# Supplementary material for: Anticancer potential of some imidazole and fused imidazole derivatives: exploring the mechanism via epidermal growth factor receptor (EGFR) inhibition
Source: Royal Society of Chemistry journal article supplement (doi:10.1039/d0md00146e), 2020-01-01
Supplement: d0md00146e1.pdf [file d0md00146e1.pdf]

### **Supplementary Material**

#### **Anticancer Potential of Some Imidazole and Fused Imidazole Derivatives: Exploring mechanism via Epidermal Growth Factor Receptor (EGFR) Inhibition**

Sourav Kalra,<sup>a</sup> Gaurav Joshi,<sup>b</sup> Manvendra Kumar,<sup>b</sup> Sahil Arora,<sup>b</sup> Harsimrat Kaur,<sup>c</sup> Sandeep Singh,<sup>a\*</sup> Anjana Munshi,<sup>a\*</sup> and Raj Kumar<sup>b\*\*</sup>

<sup>a</sup>Department of Human Genetics and Molecular Medicine, School of Health Sciences;

<sup>b</sup>Department of Pharmaceutical Sciences and Natural Products, School of Basic and Applied Sciences, Central University of Punjab, Bathinda, 151001

<sup>c</sup>Desh Bhagat Dental College and Hospital, Mandi Gobindgarh, India

\*\*E-mail: [raj.khunger@gmail.com](mailto:raj.khunger@gmail.com); [rajcps@cup.ac.in](mailto:rajcps@cup.ac.in)

Co-corresponding authors\*E-mail: [anjanadurani@yahoo.co.in](mailto:anjanadurani@yahoo.co.in); [sandeepsingh82@gmail.com](mailto:sandeepsingh82@gmail.com)

# **Spectra for representative compounds**

# Data <sup>1</sup>H, <sup>13</sup>C NMR, and HRMS

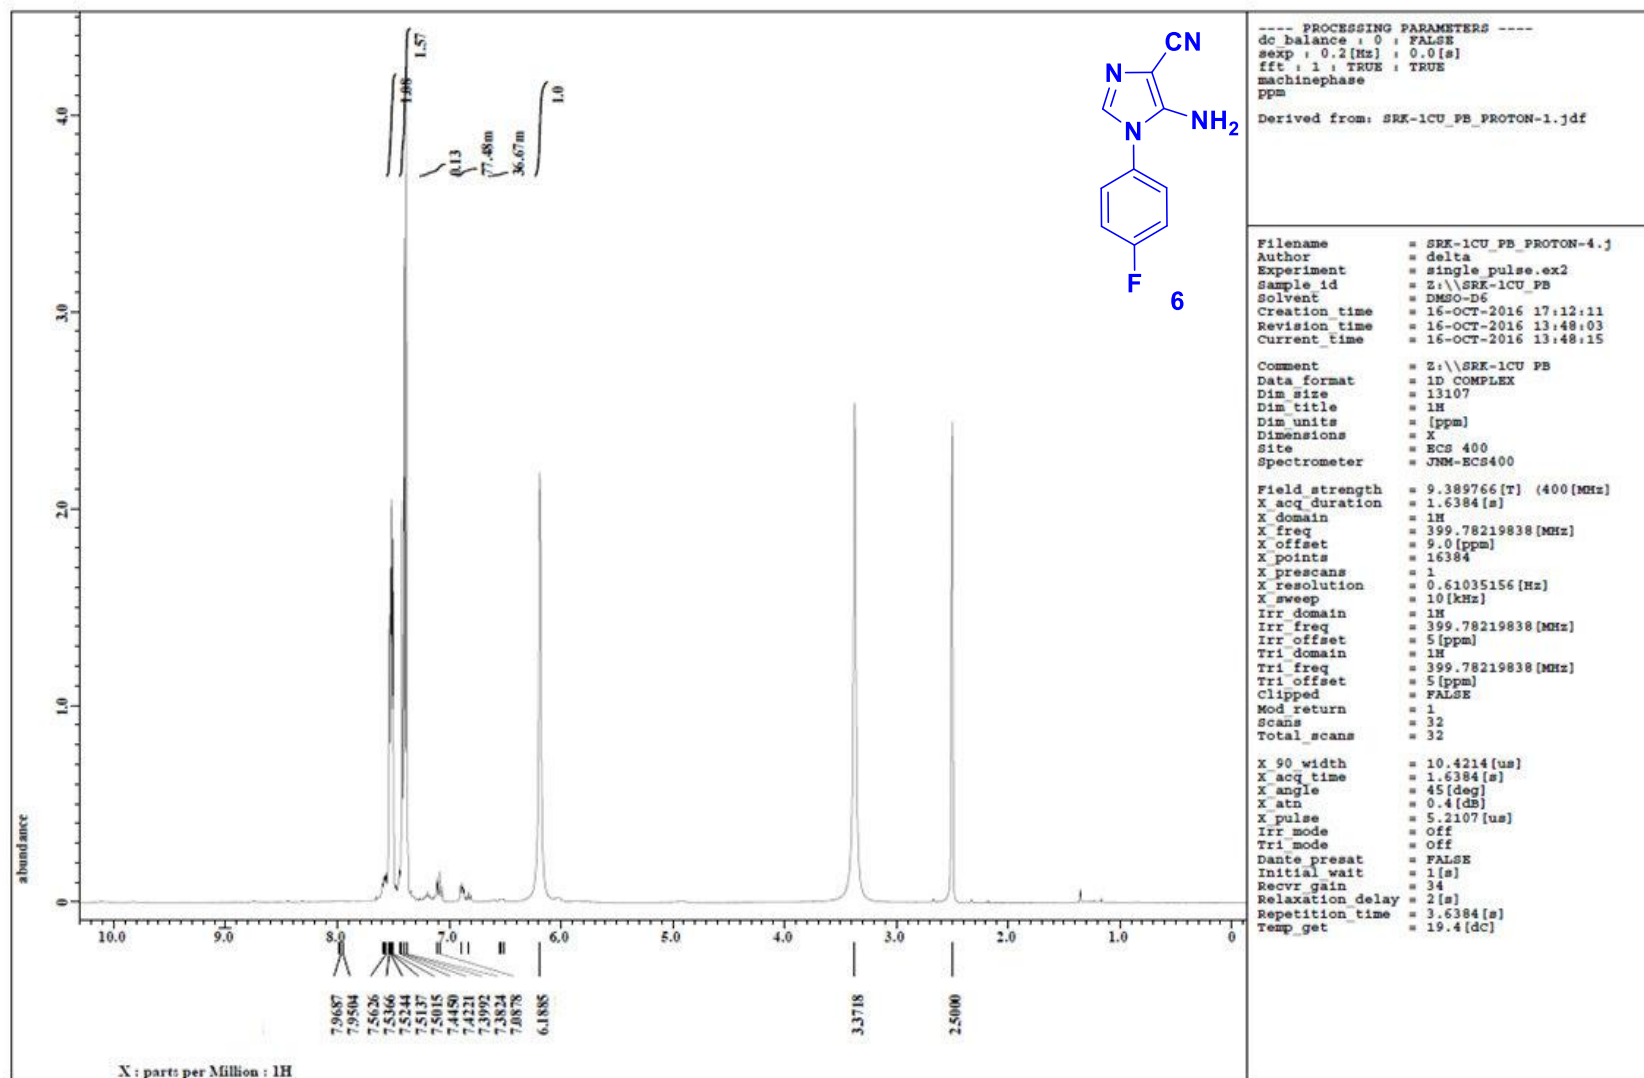

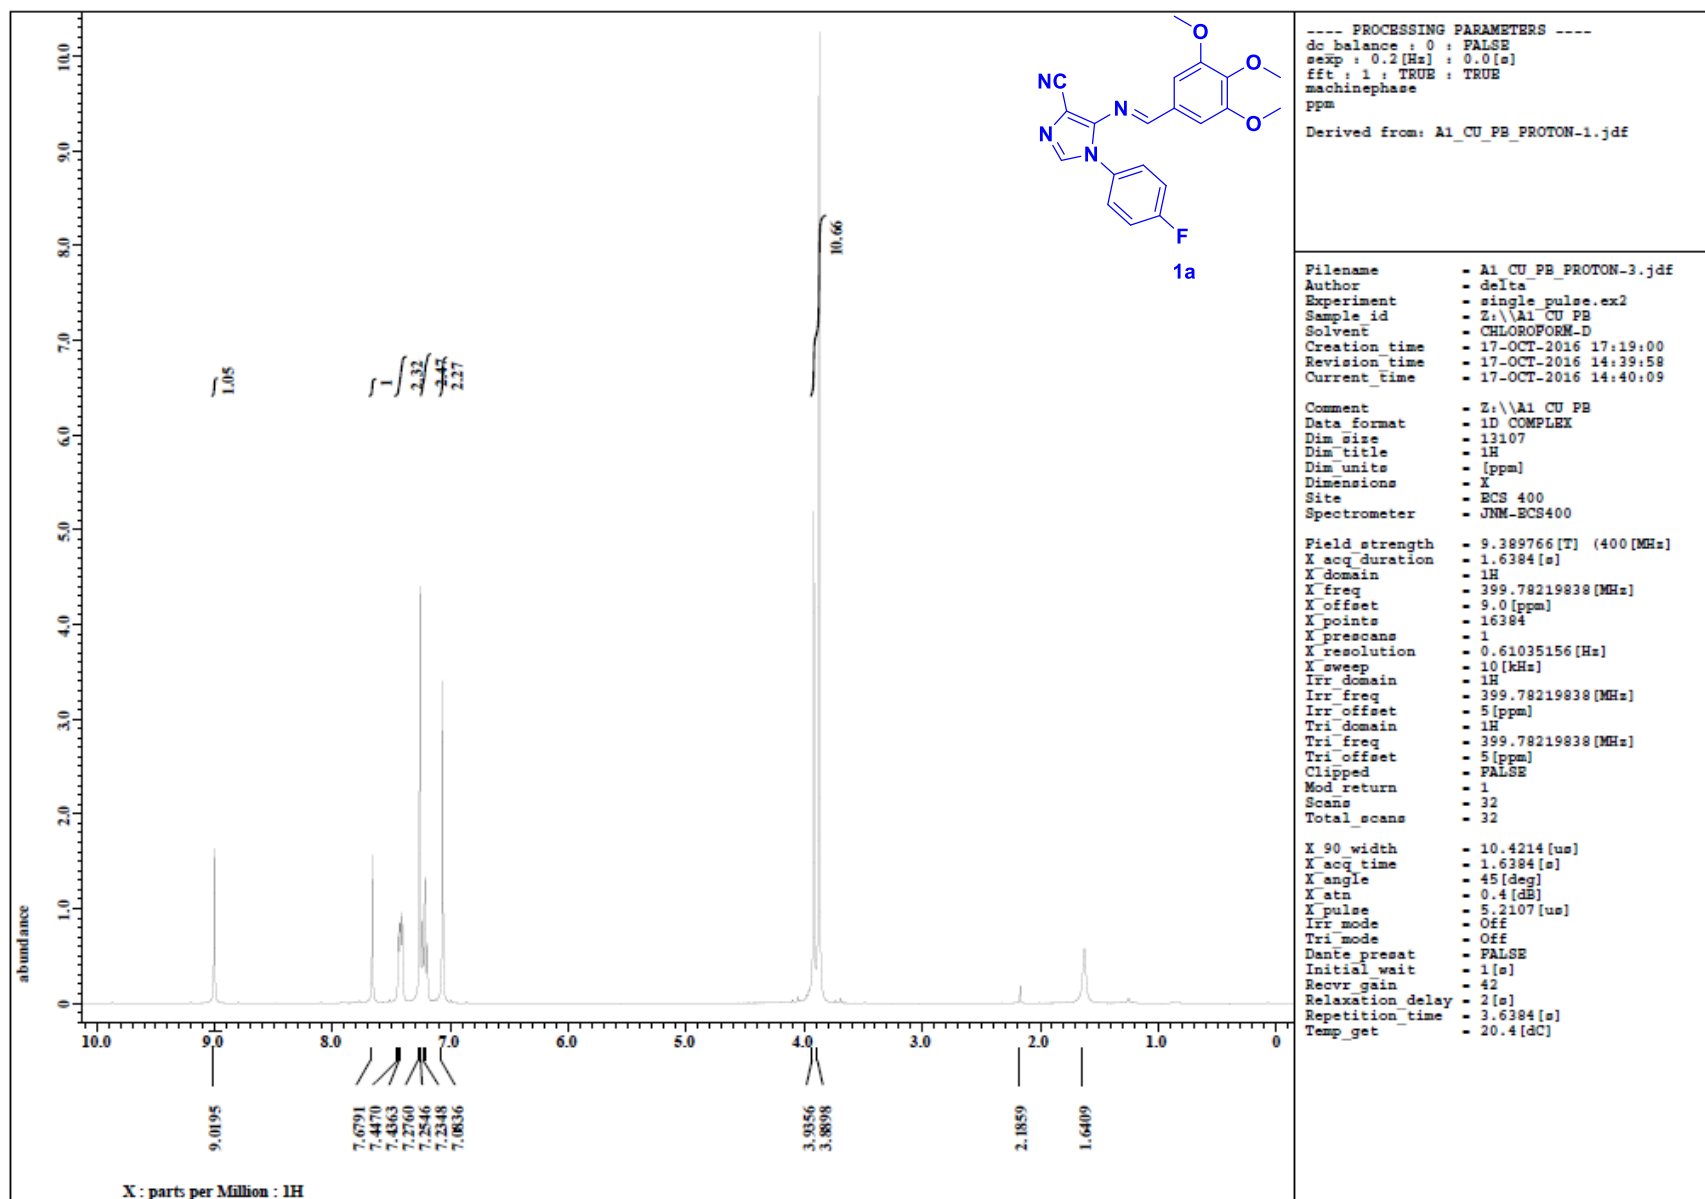

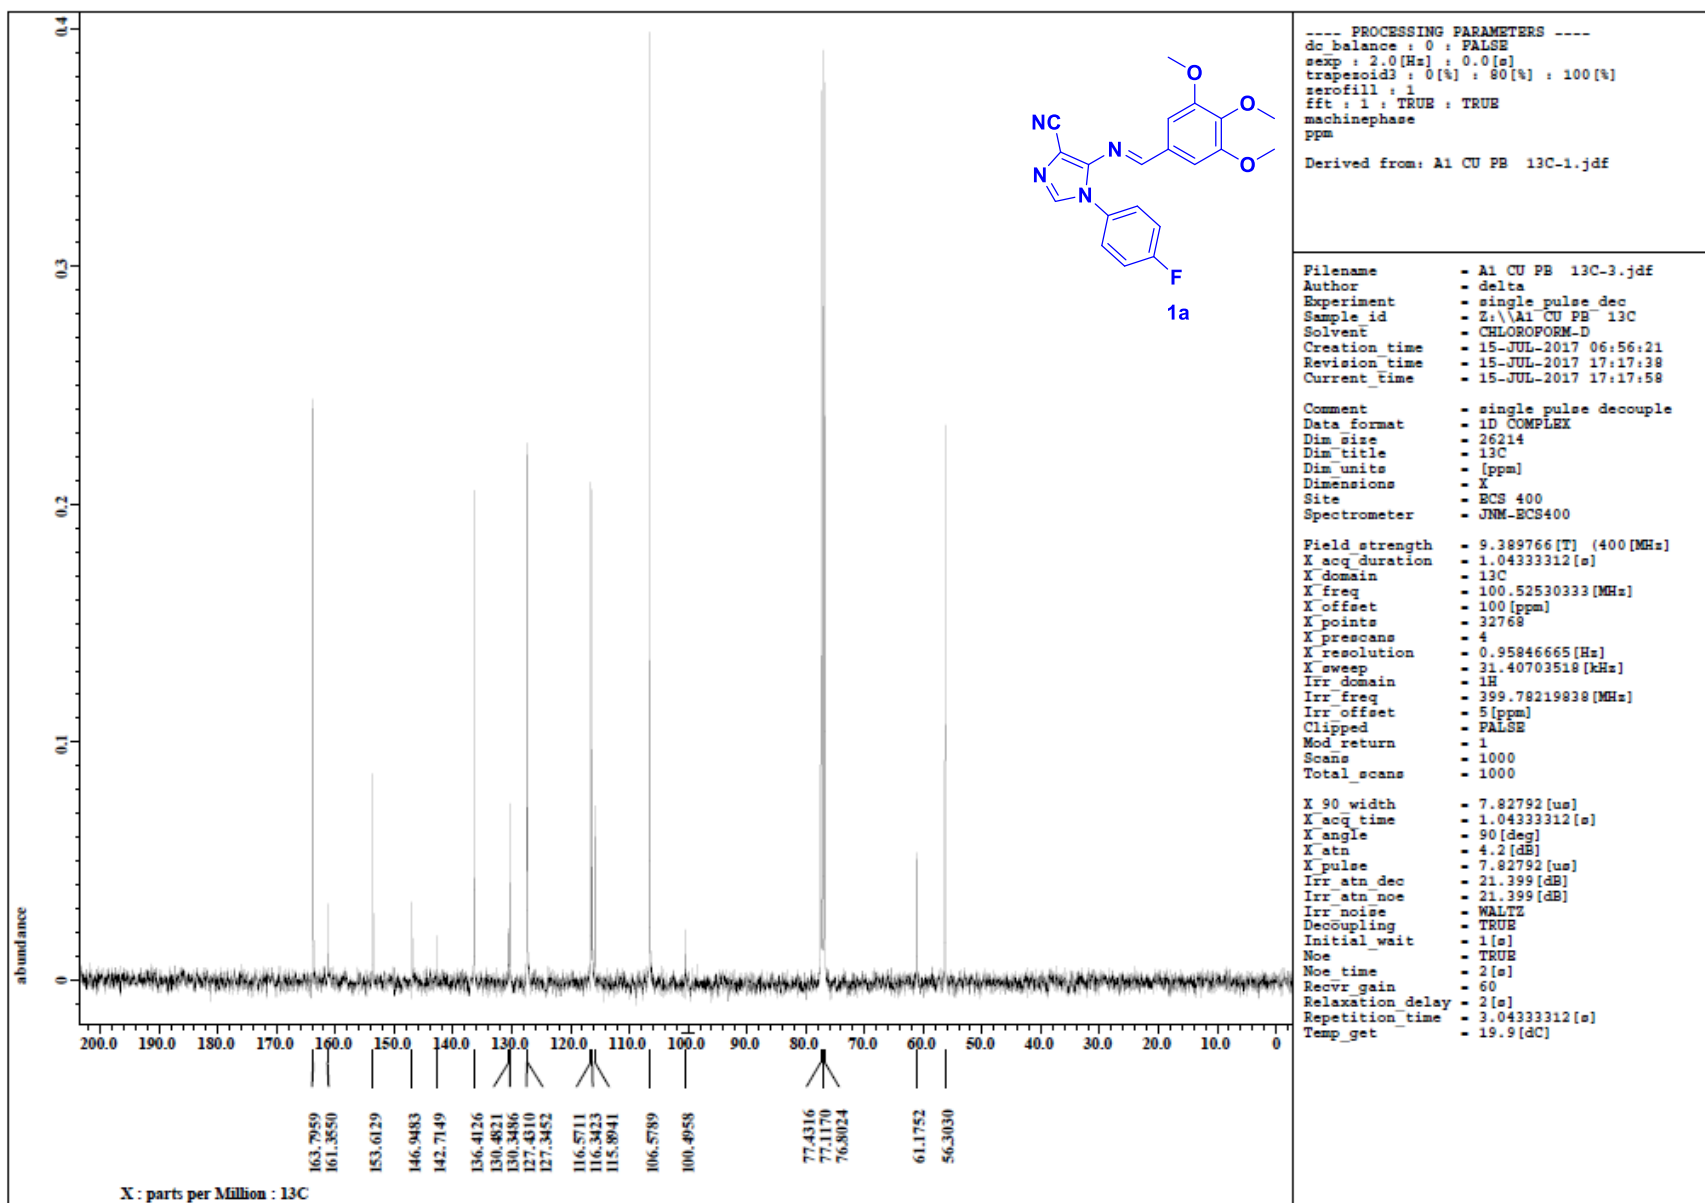

## Elemental Composition Report

Page 1

### Single Mass Analysis

Tolerance = 3.0 PPM / DBE: min = -1.5, max = 50.0

Element prediction: Off

Number of isotope peaks used for i-FIT = 5

Monoisotopic Mass, Even Electron Ions

40 formula(e) evaluated with 1 results within limits (up to 50 best isotopic matches for each mass)

Elements Used:

C: 9-25 H: 11-30 N: 0-4 O: 0-3 F: 0-1

Sample Name : A-1

Test Name : HRMS-1

160120-A-1 17 (0.174)

IITRPR

XEVO G2-XS QTOF

1: TOF MS ES+  
2.77e+007

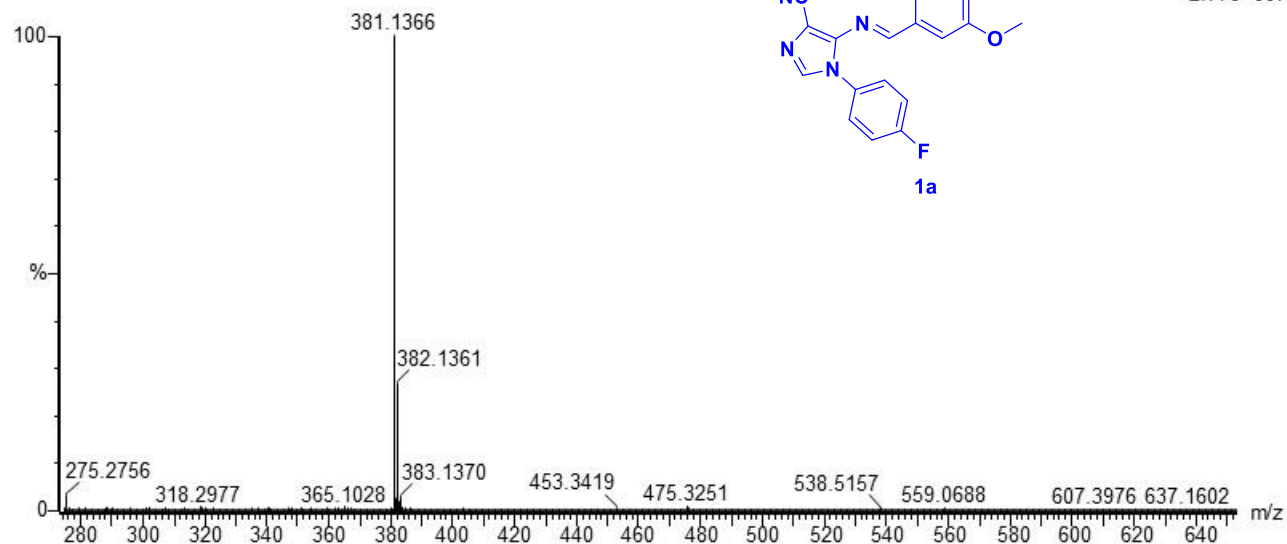

Minimum: -1.5  
Maximum: 5.0 3.0 50.0

| Mass     | Calc. Mass | mDa | PPM | DBE  | i-FIT  | Norm | Conf(%) | Formula                                                         |
|----------|------------|-----|-----|------|--------|------|---------|-----------------------------------------------------------------|
| 381.1366 | 381.1363   | 0.3 | 0.8 | 13.5 | 1449.5 | n/a  | n/a     | C <sub>20</sub> H <sub>18</sub> N <sub>4</sub> O <sub>3</sub> F |

Line#:1 R.Time:4.860(Scan#:673)  
MassPeaks:541  
RawMode:Averaged 4.855-4.865(672-674) BasePeak:380(492565)  
BG Mode:Calc. from Peak Group 1 - Event 1  
intensity

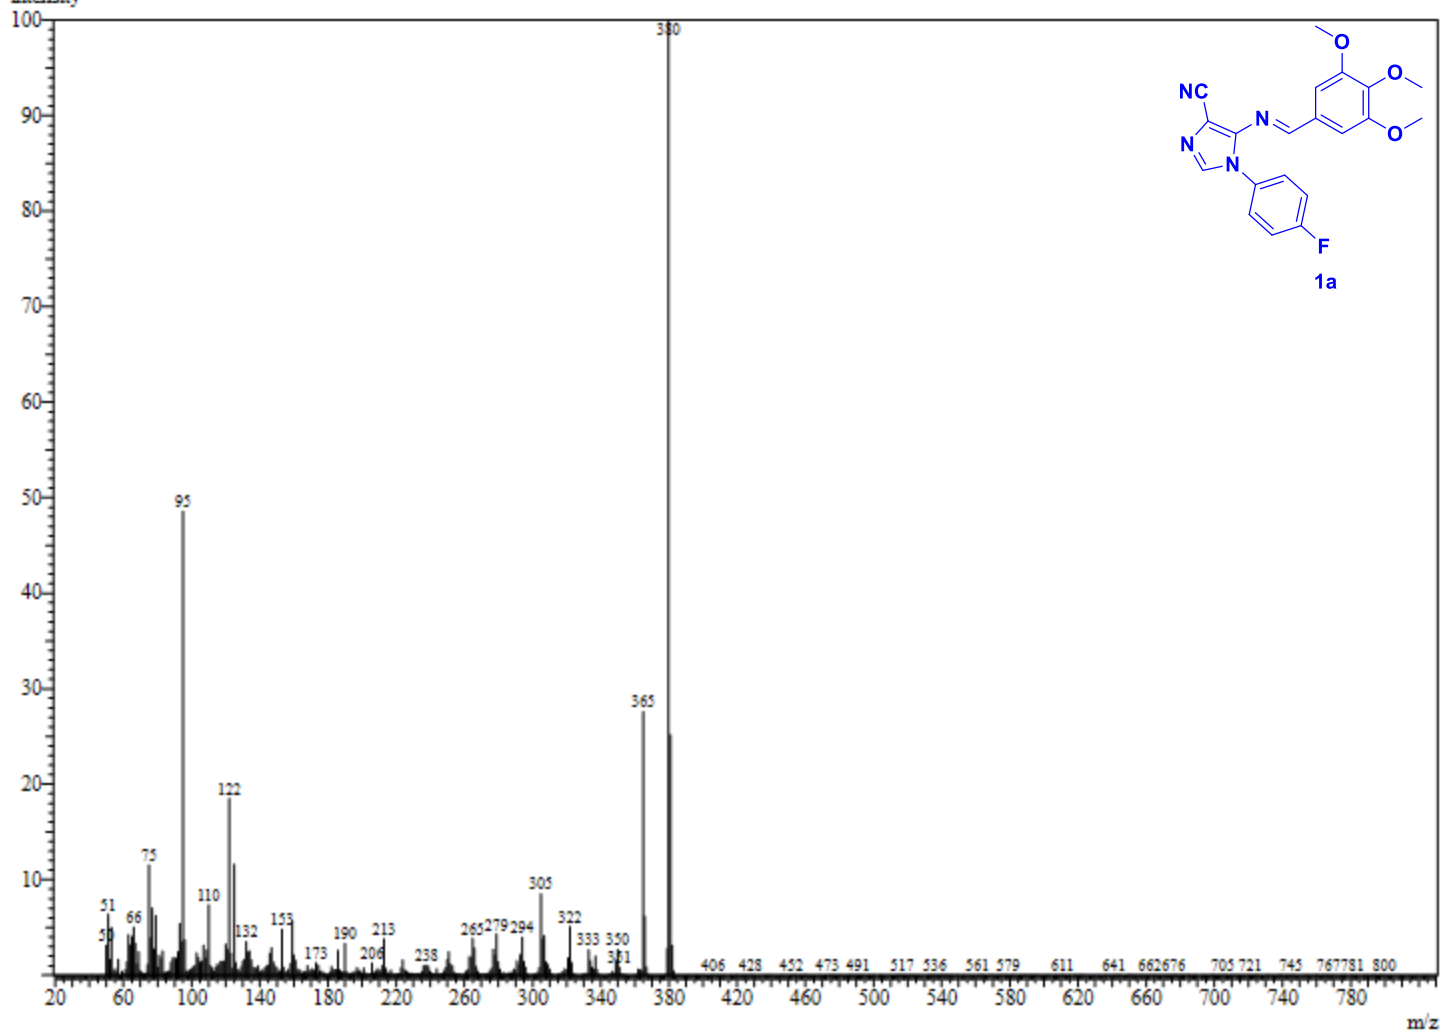

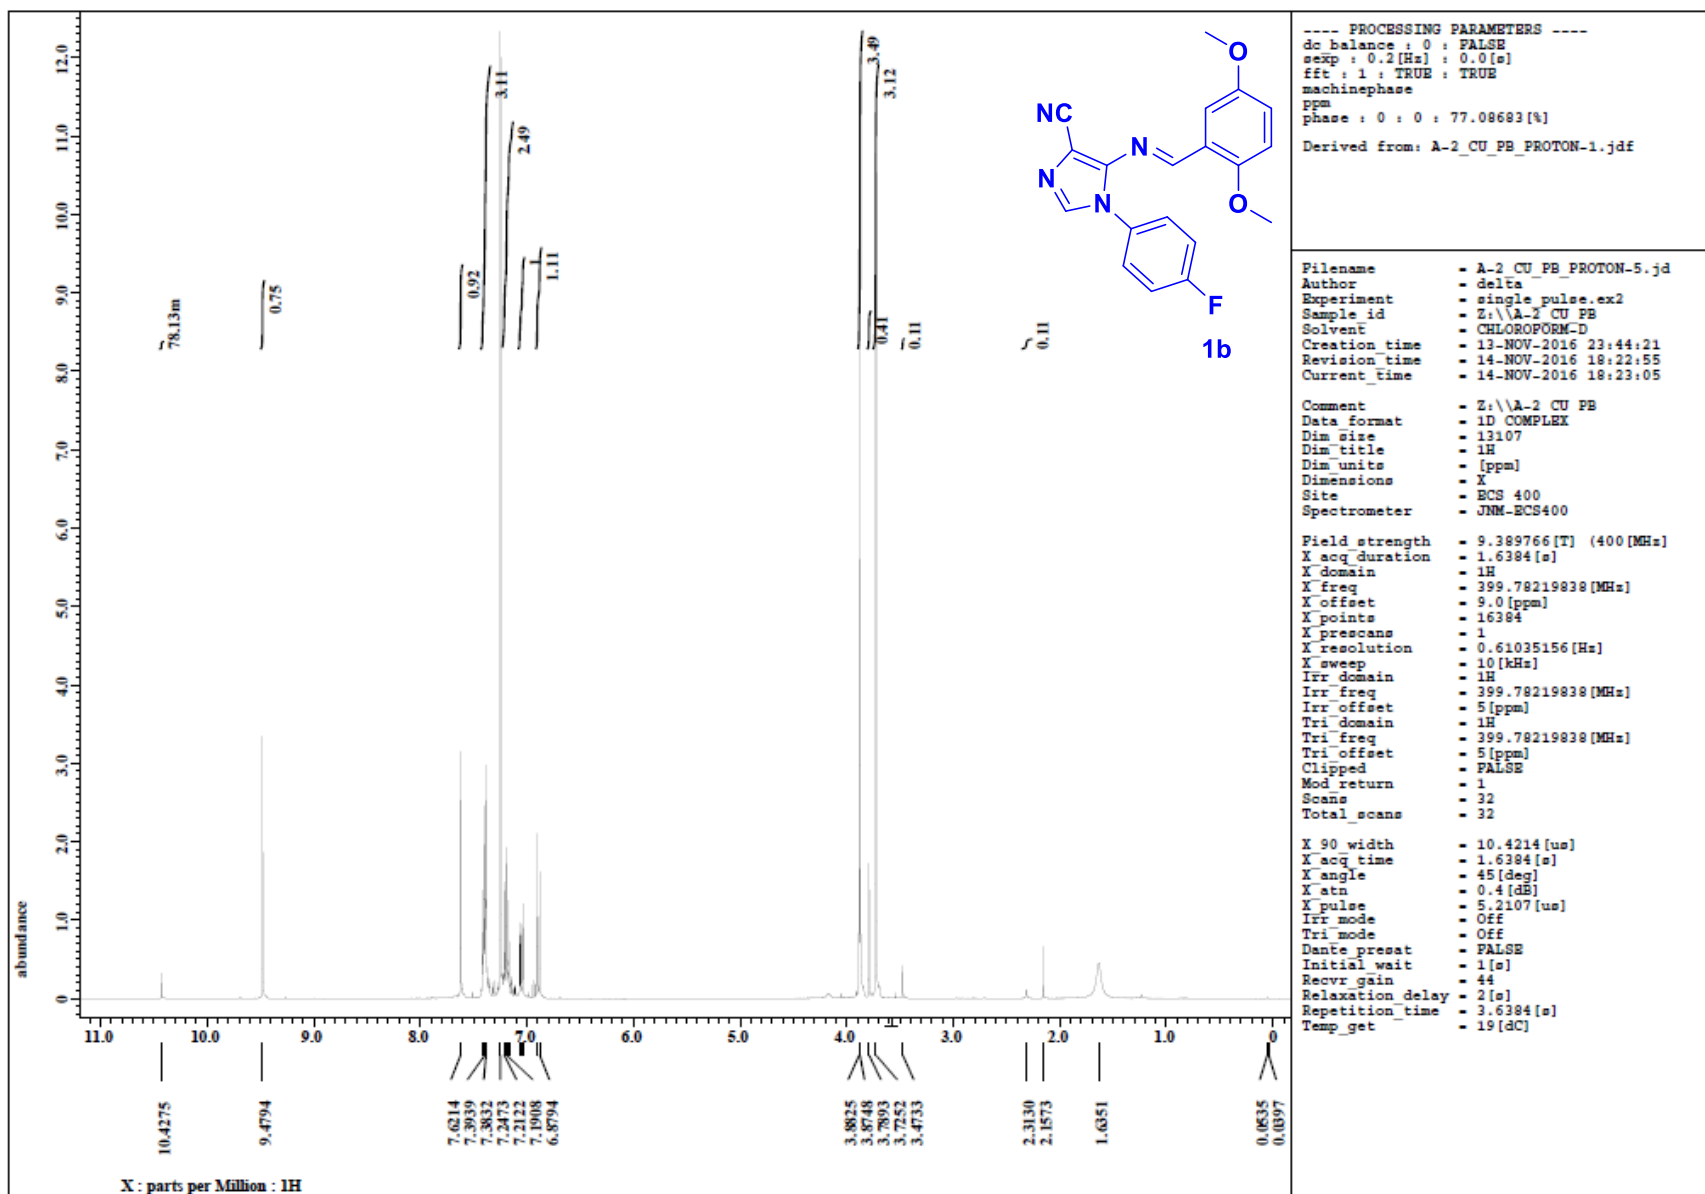

A-2 C13

single pulse decoupled gated NOE

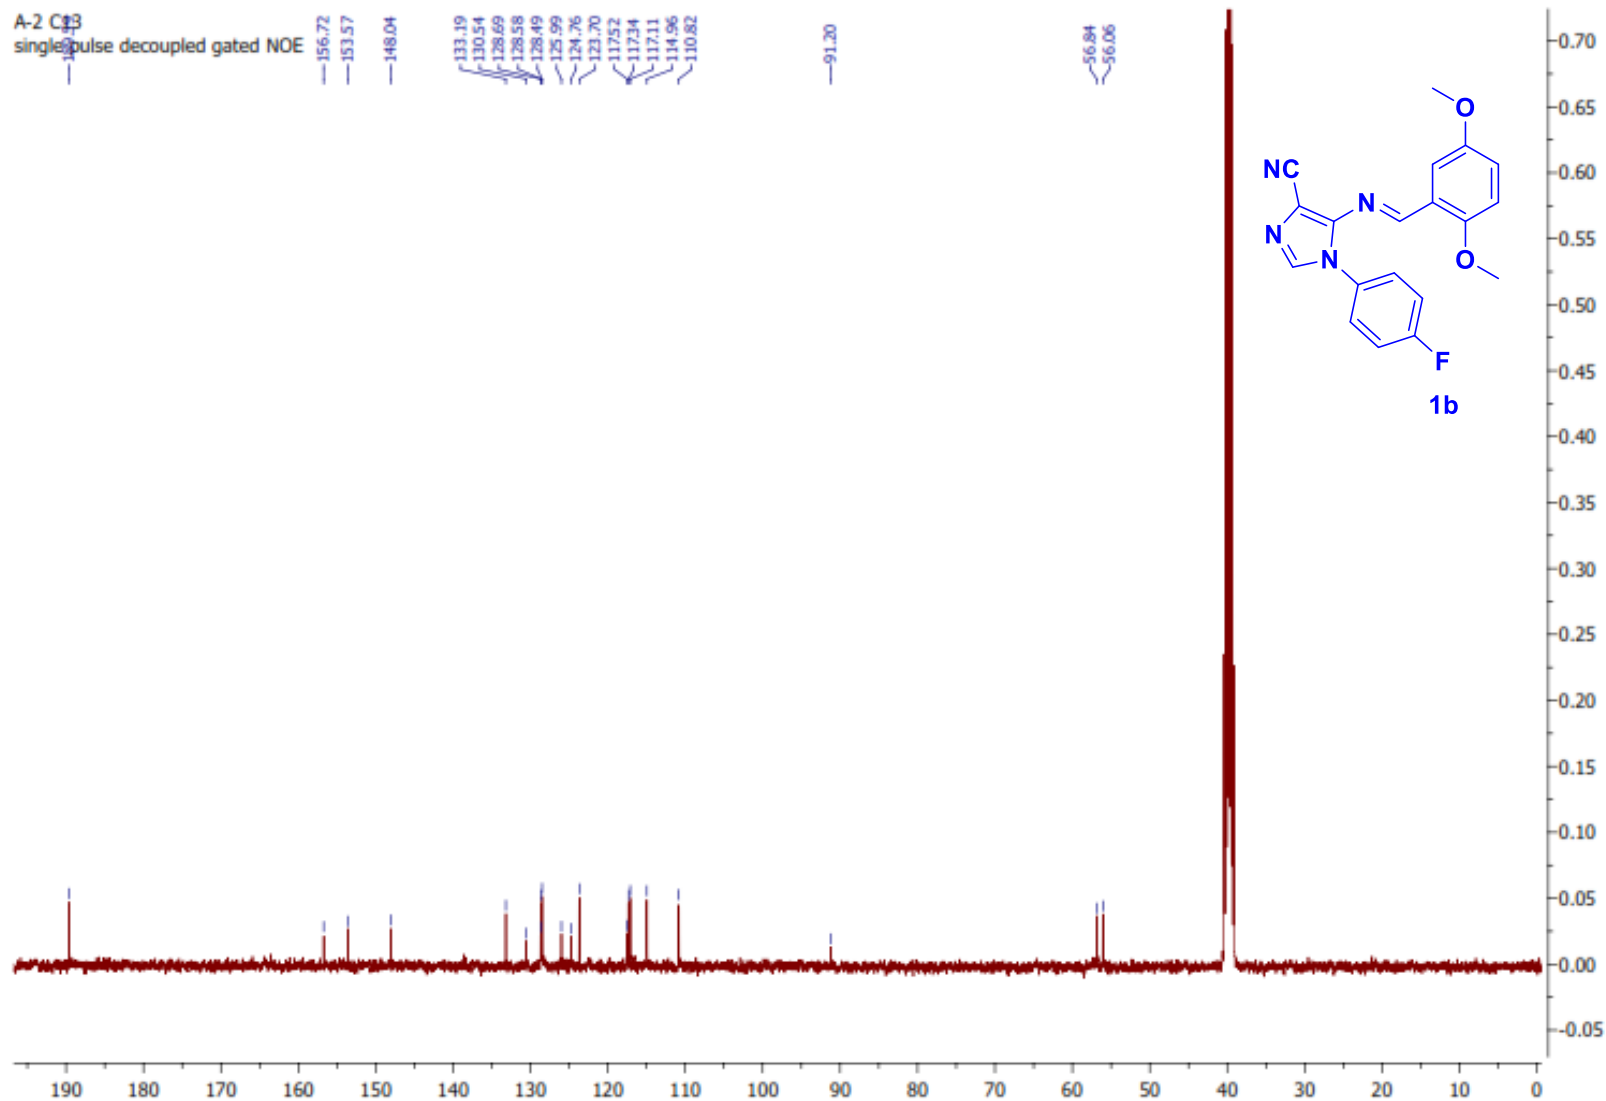

## Elemental Composition Report

Page 1

### Single Mass Analysis

Tolerance = 5.0 PPM / DBE: min = -1.5, max = 50.0

Element prediction: Off

Number of isotope peaks used for i-FIT = 5

Monoisotopic Mass, Even Electron Ions

39 formula(e) evaluated with 1 results within limits (up to 50 best isotopic matches for each mass)

Elements Used:

C: 9-21 H: 8-25 N: 0-5 O: 0-3 F: 0-1

Sample Name : A-2

IITRPR

XEVO G2-XS QTOF

Test Name : HRMS-1

160120-A-2- 16 (0.165)

1: TOF MS ES+  
4.44e+007

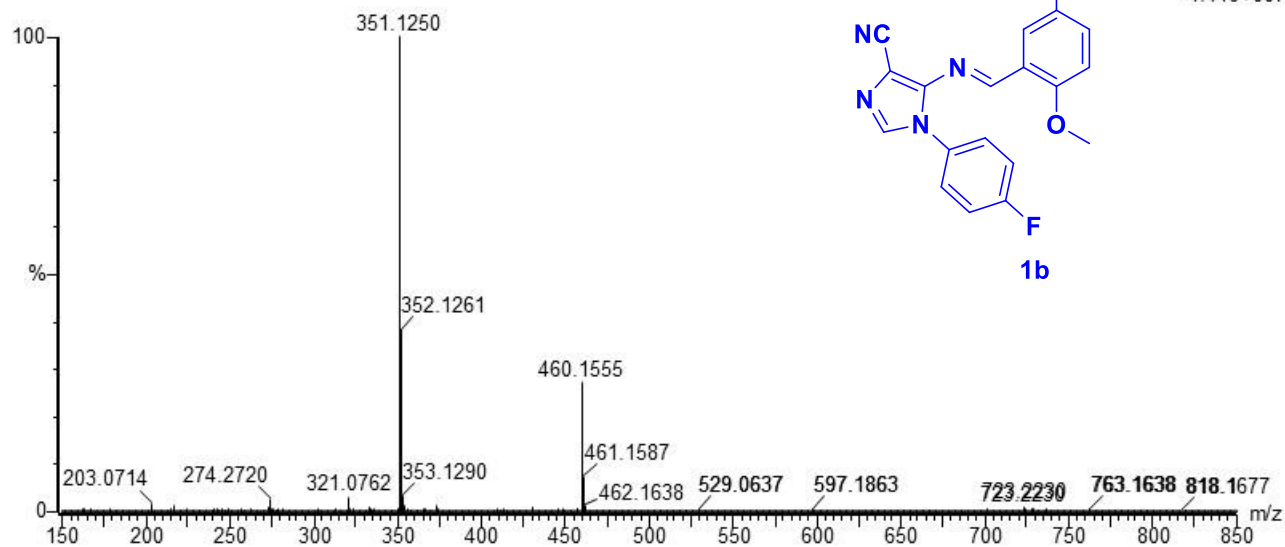

Minimum: -1.5  
Maximum: 5.0 5.0 50.0

| Mass     | Calc. Mass | mDa  | PPM  | DBE  | i-FIT  | Norm | Conf(%) | Formula                                                         |
|----------|------------|------|------|------|--------|------|---------|-----------------------------------------------------------------|
| 351.1250 | 351.1257   | -0.7 | -2.0 | 13.5 | 1726.8 | n/a  | n/a     | C <sub>19</sub> H <sub>16</sub> N <sub>4</sub> O <sub>2</sub> F |

Line#1 R.Time:4.000(Scan#:501)

MassPeaks:336

RawMode:Averaged 4.000-4.005(501-502) BasePeak:166(3373)

BG Mode:Calc. from Peak Group 1 - Event 1

intensity

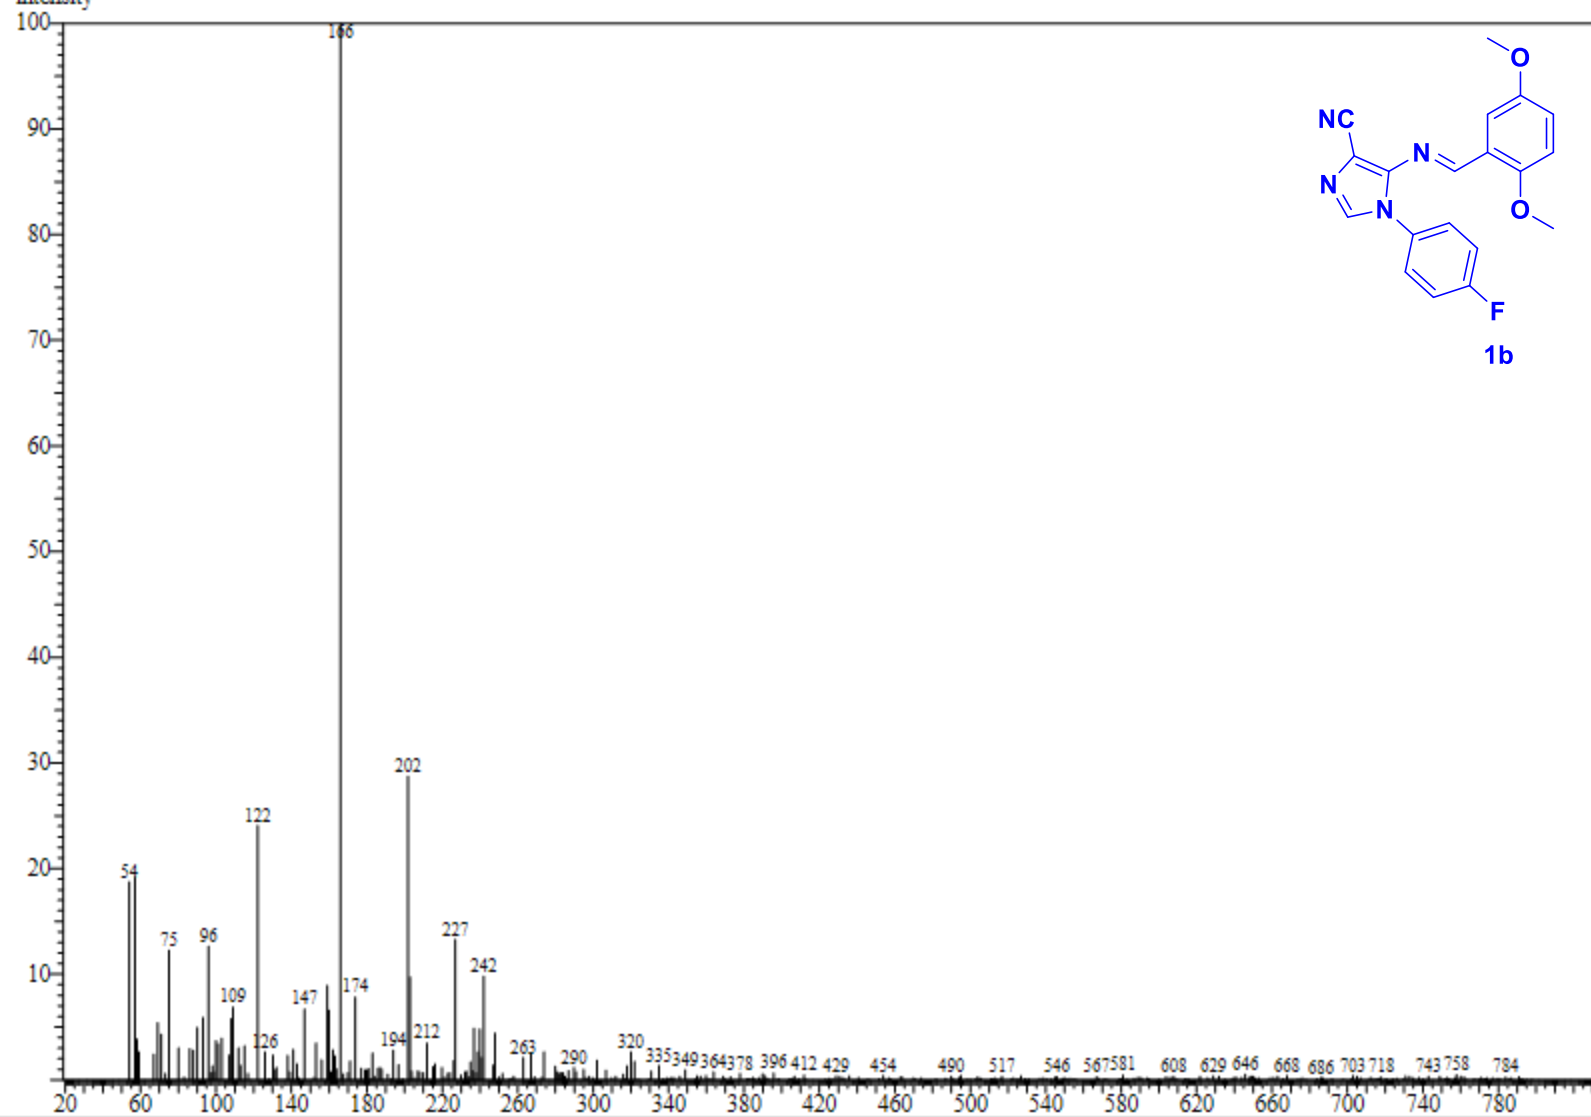

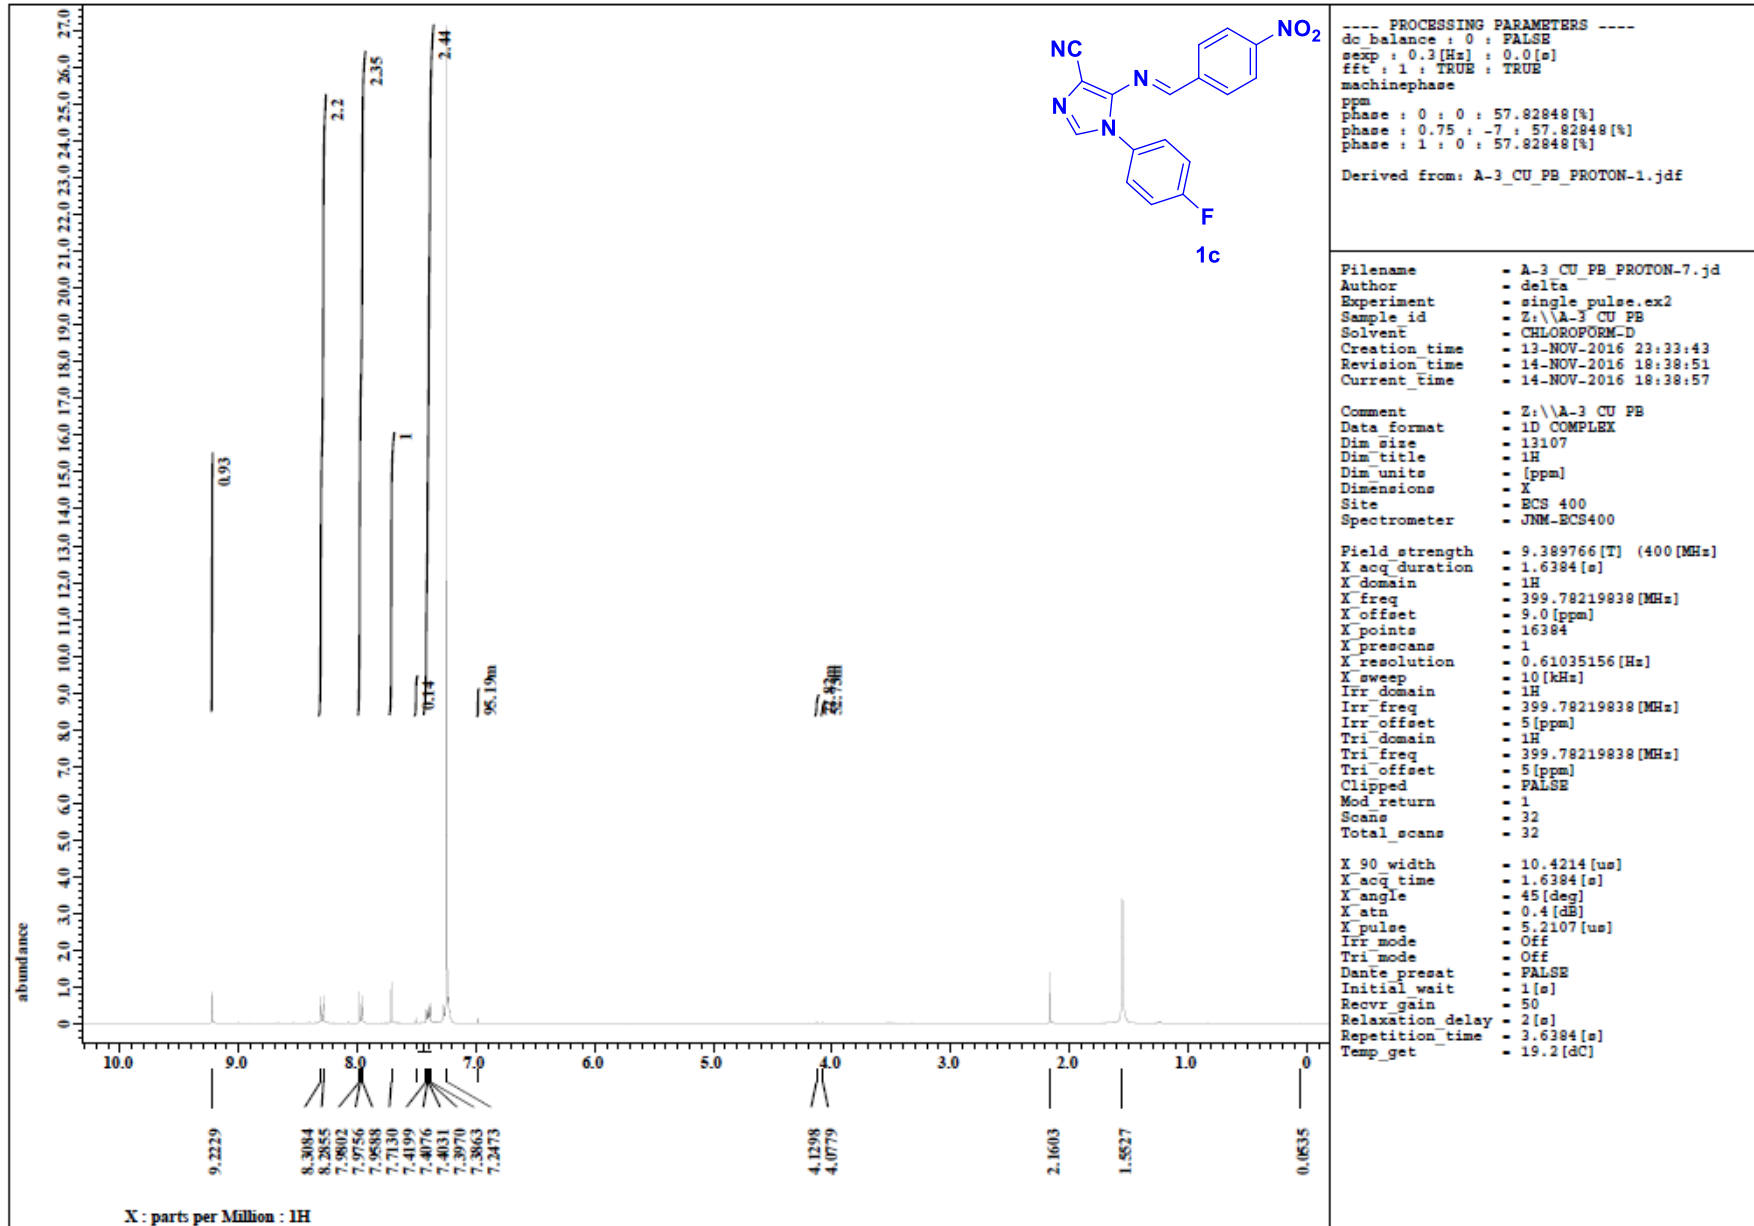

## Elemental Composition Report

Page 1

### Single Mass Analysis

Tolerance = 5.0 PPM / DBE: min = -1.5, max = 50.0

Element prediction: Off

Number of isotope peaks used for i-FIT = 5

Monoisotopic Mass, Even Electron Ions

52 formula(e) evaluated with 1 results within limits (up to 50 best isotopic matches for each mass)

Elements Used:

C: 9-21 H: 11-30 N: 0-5 O: 0-3 F: 0-1

Sample Name : A-3

IITRPR

XEVO G2-XS QTOF

Test Name : HRMS-1

160120-A-3 14 (0.148)

1: TOF MS ES+

4.81e+007

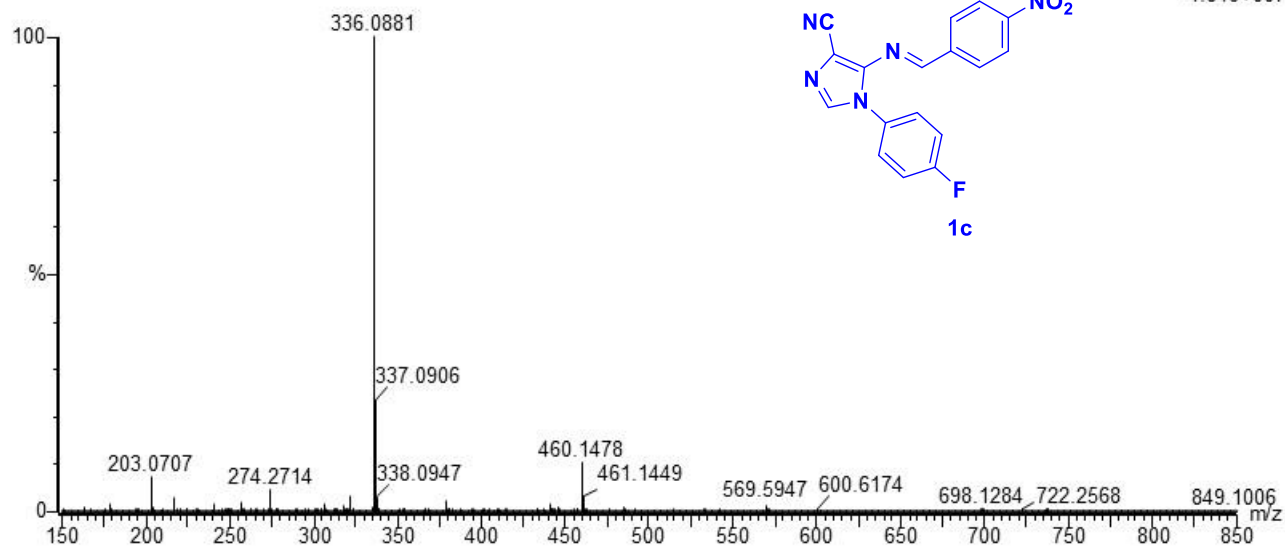

Minimum: -1.5  
Maximum: 5.0 5.0 50.0

| Mass     | Calc. Mass | mDa  | PPM  | DBE  | i-FIT  | Norm | Conf(%) | Formula         |
|----------|------------|------|------|------|--------|------|---------|-----------------|
| 336.0881 | 336.0897   | -1.6 | -4.8 | 14.5 | 1585.4 | n/a  | n/a     | C17 H11 N5 O2 F |

x

Line#:1 R.Time:3.420(Scan#:385)

MassPeaks:365

RawMode:Averaged 3.415-3.425(384-386) BasePeak:202(290256)

BG Mode:Calc. from Peak Group 1 - Event 1

intensity

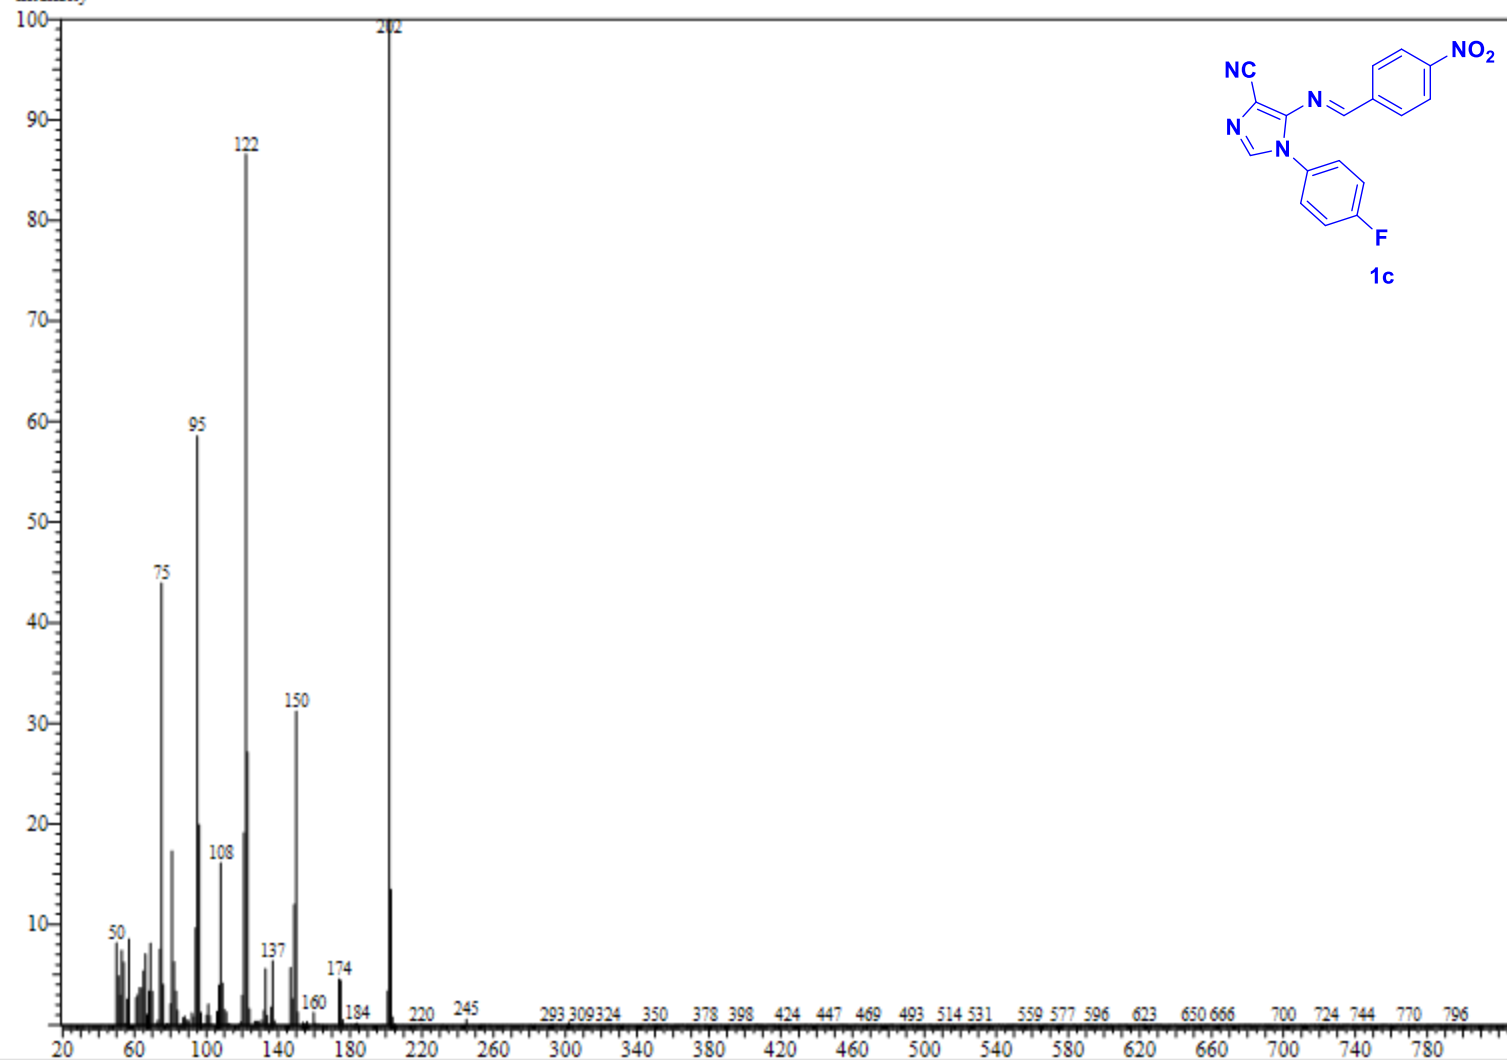

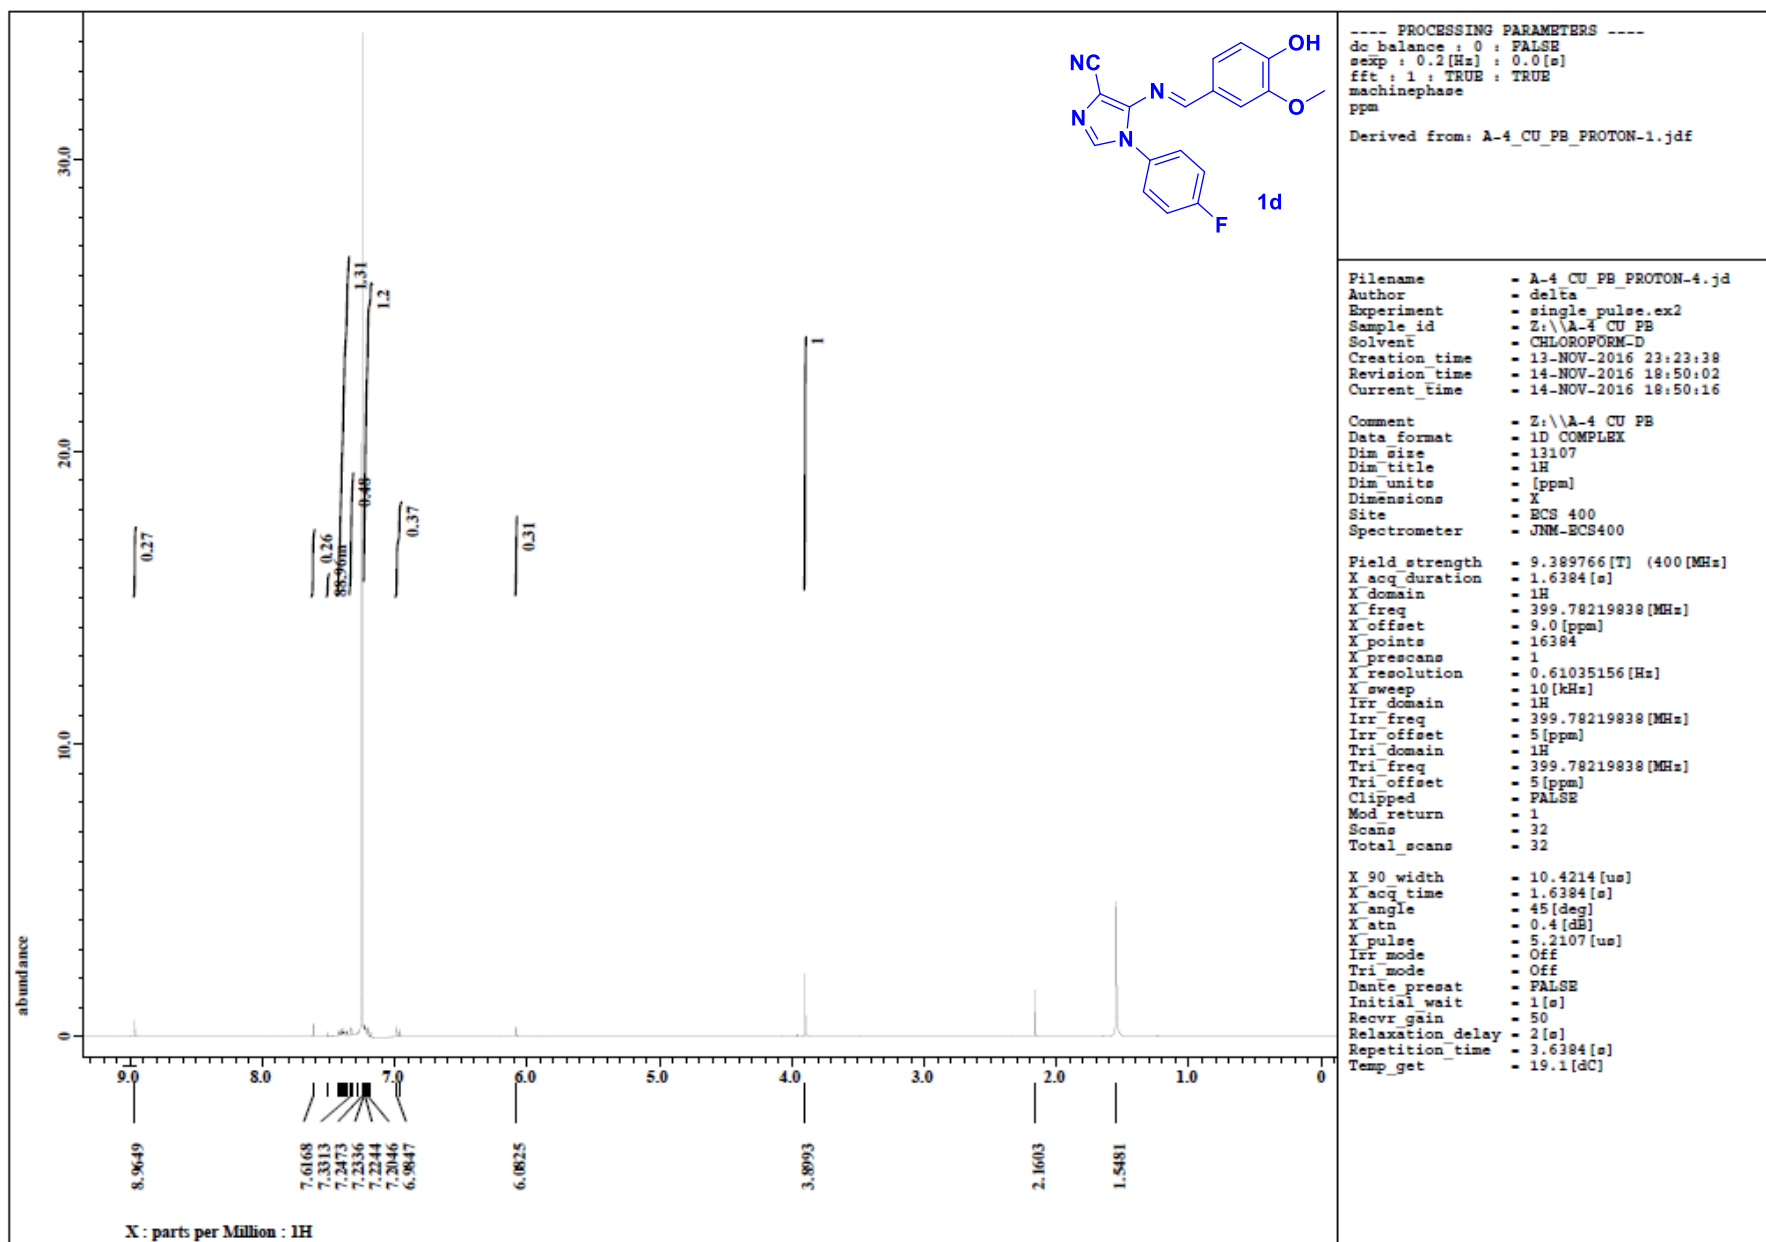

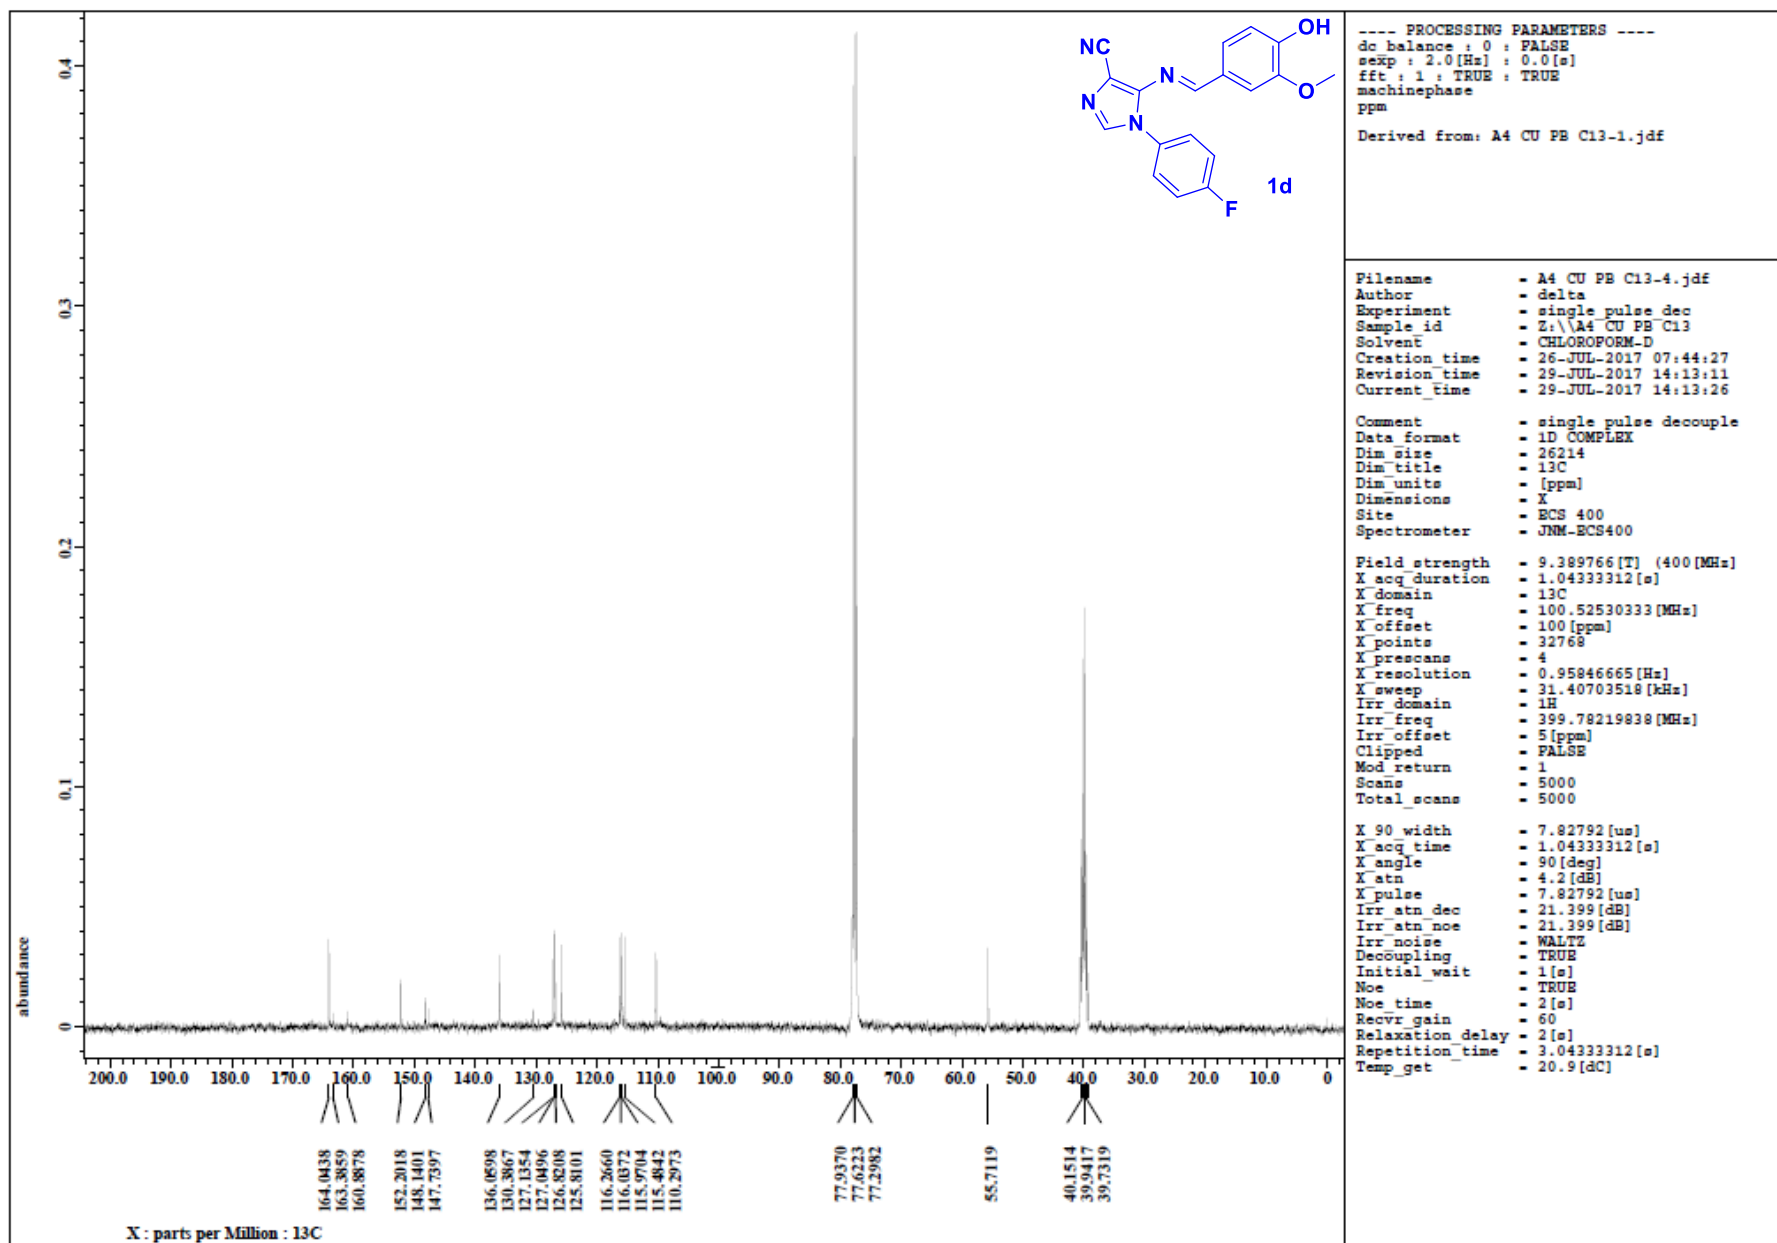

# Elemental Composition Report

Page 1

## Single Mass Analysis

Tolerance = 6.0 PPM / DBE: min = -1.5, max = 50.0

Element prediction: Off

Number of isotope peaks used for i-FIT = 5

Monoisotopic Mass, Odd and Even Electron Ions

46 formula(e) evaluated with 1 results within limits (up to 50 best isotopic matches for each mass)

Elements Used:

C: 9-20 H: 11-30 N: 0-5 O: 0-3 F: 0-1

Sample Name : A-4

IITRPR

XEVO G2-XS QTOF

Test Name : HRMS-1

160120-A-4 16 (0.165)

1: TOF MS ES+

1.57e+005

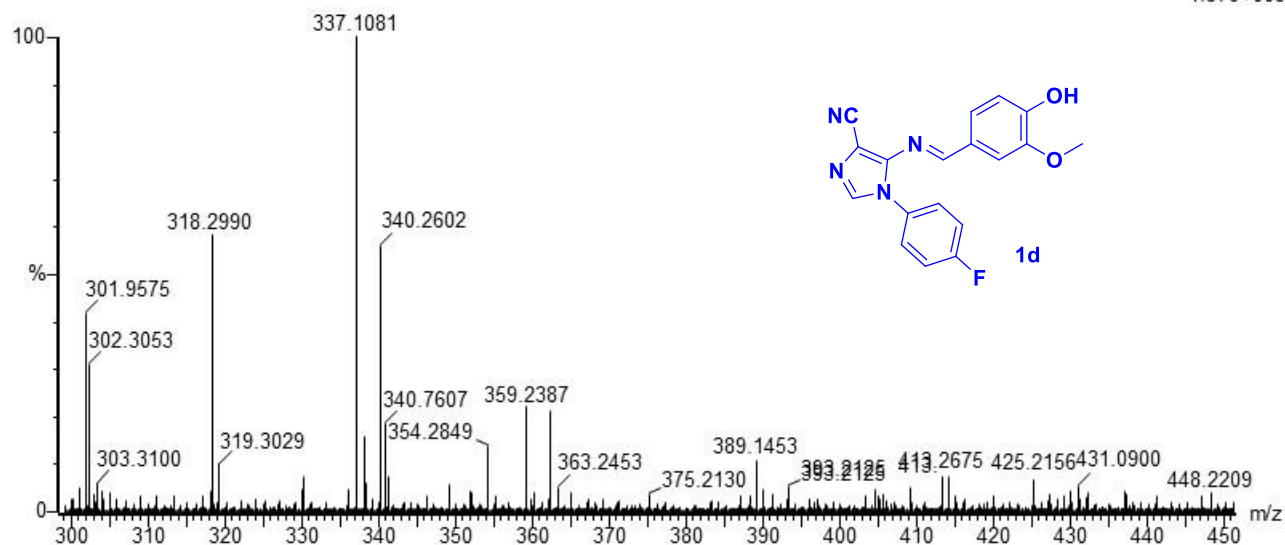

Minimum: -1.5  
Maximum: 5.0 6.0 50.0

| Mass     | Calc. Mass | mDa  | PPM  | DBE  | i-FIT  | Norm | Conf(%) | Formula         |
|----------|------------|------|------|------|--------|------|---------|-----------------|
| 337.1081 | 337.1101   | -2.0 | -5.9 | 13.5 | 1087.3 | n/a  | n/a     | C18 H14 N4 O2 F |

# Spectrum

Line#:1 R.Time:6.470(Scan#:995)

MassPeaks:582

RawMode:Averaged 6.465-6.475(994-996) BasePeak:336(1955400)

BG Mode:Calc. from Peak Group 1 - Event 1

intensity

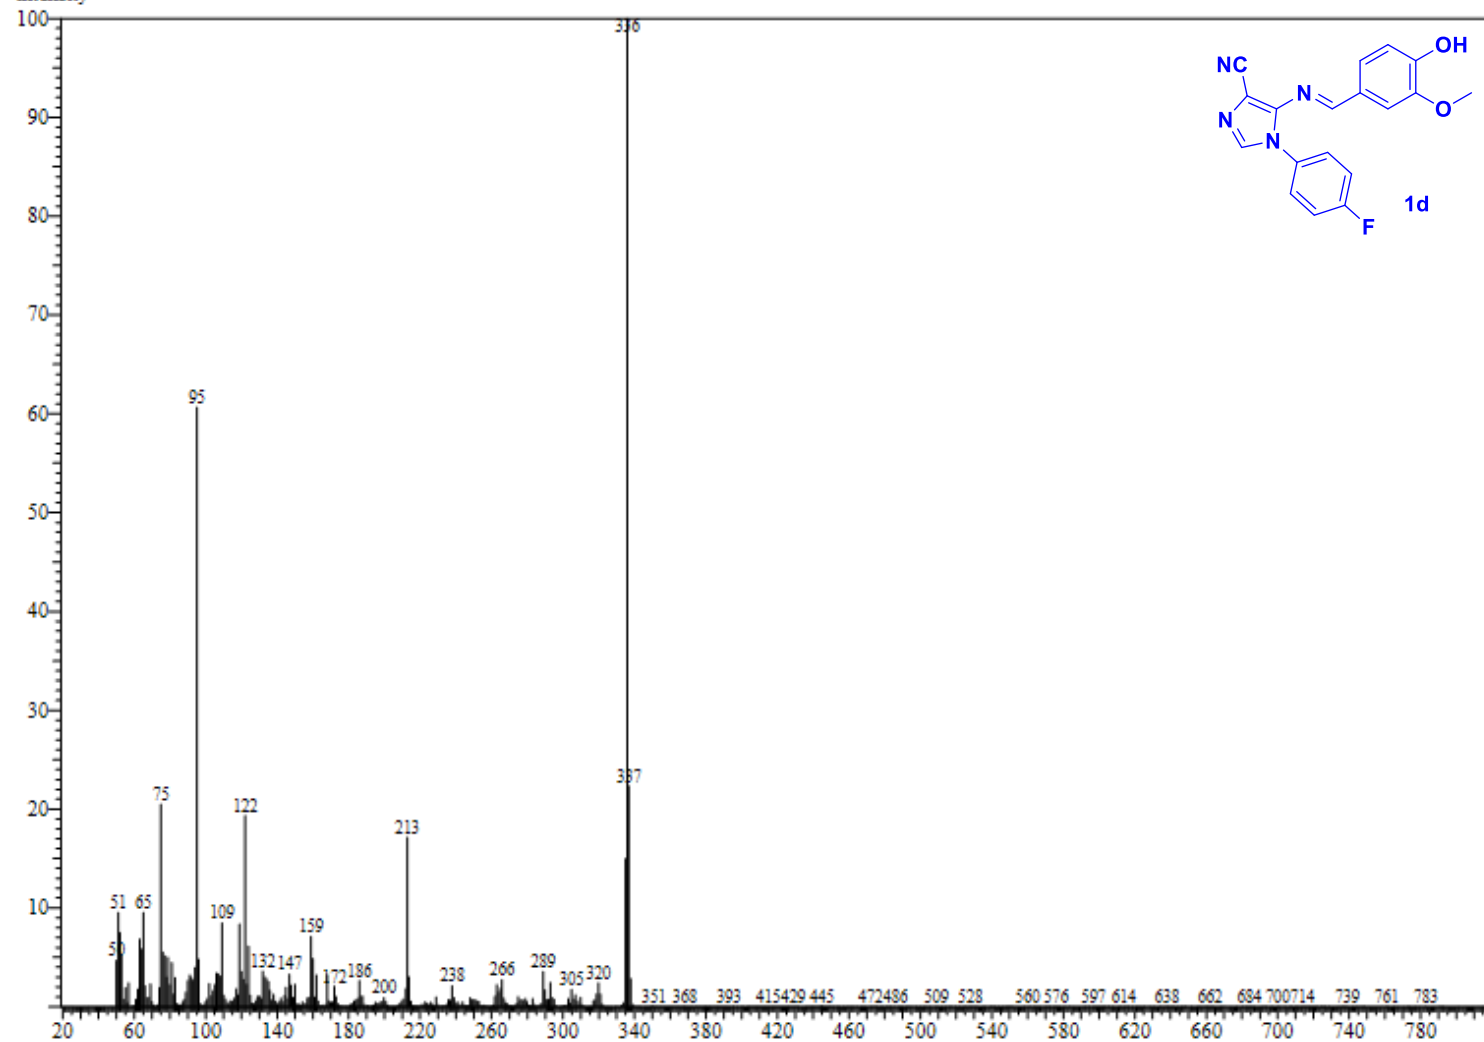

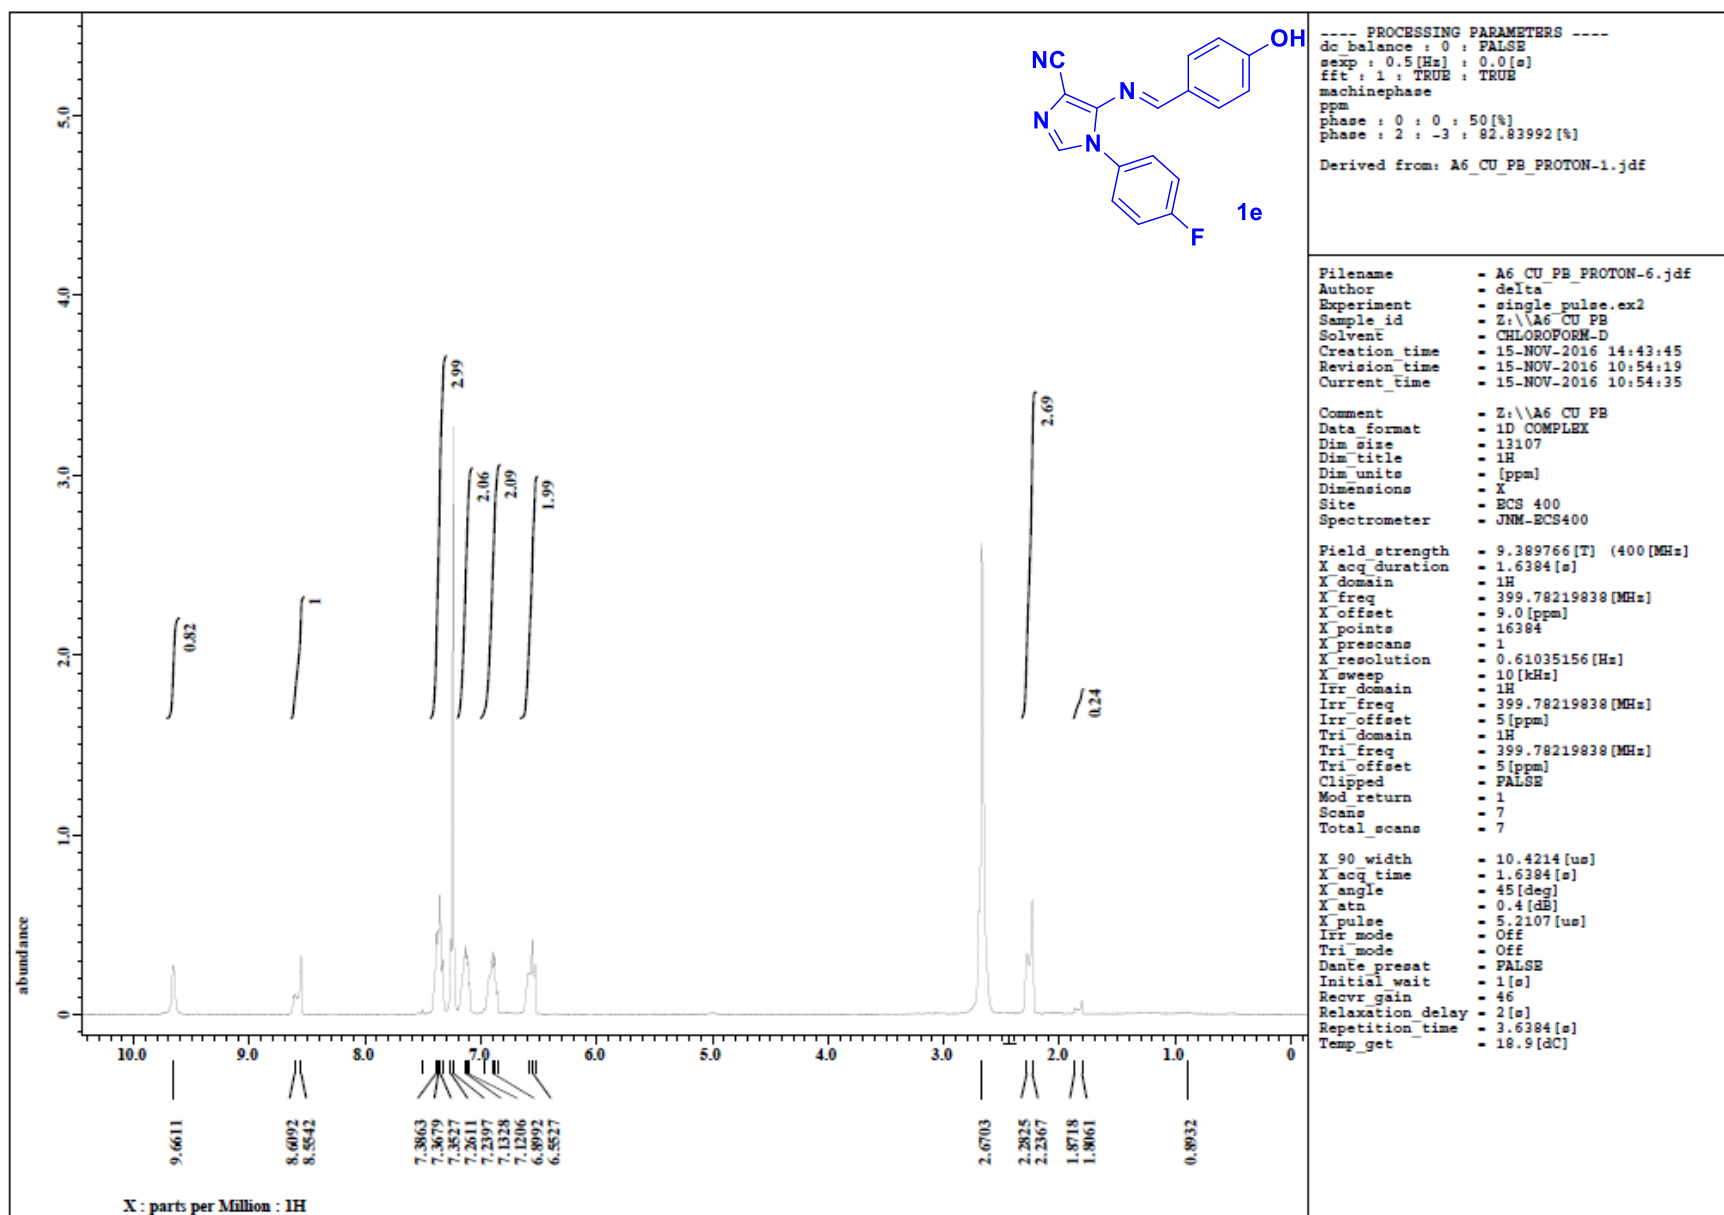

## Elemental Composition Report

Page 1

### Single Mass Analysis

Tolerance = 6.0 PPM / DBE: min = -1.5, max = 50.0

Element prediction: Off

Number of isotope peaks used for i-FIT = 5

Monoisotopic Mass, Even Electron Ions

59 formula(e) evaluated with 1 results within limits (up to 50 best isotopic matches for each mass)

Elements Used:

C: 9-19 H: 11-30 N: 0-5 O: 0-3 F: 0-1

Sample Name : A-6

IITRPR

XEVO G2-XS QTOF

Test Name : HRMS-1

160120-A-6 15 (0.157)

1: TOF MS ES+

5.89e+007

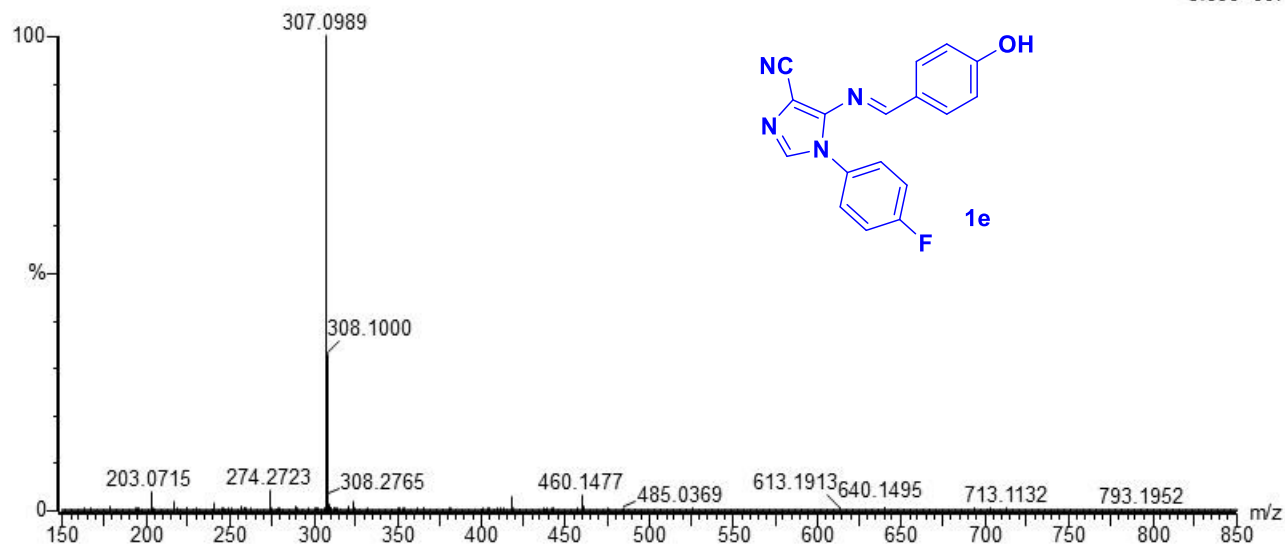

Minimum:

-1.5

Maximum:

5.0 6.0 50.0

| Mass | Calc. Mass | mDa | PPM | DBE | i-FIT | Norm | Conf(%) | Formula |
|------|------------|-----|-----|-----|-------|------|---------|---------|
|------|------------|-----|-----|-----|-------|------|---------|---------|

|          |          |      |      |      |        |     |     |                |
|----------|----------|------|------|------|--------|-----|-----|----------------|
| 307.0989 | 307.0995 | -0.6 | -2.0 | 13.5 | 1777.2 | n/a | n/a | C17 H12 N4 O F |
|----------|----------|------|------|------|--------|-----|-----|----------------|

# Spectrum

Line#:1 R.Time:6.270(Scan#:955)

MassPeaks:557

RawMode:Averaged 6.265-6.275(954-956) BasePeak:306(2138462)

BG Mode:Calc. from Peak Group 1 - Event 1

intensity

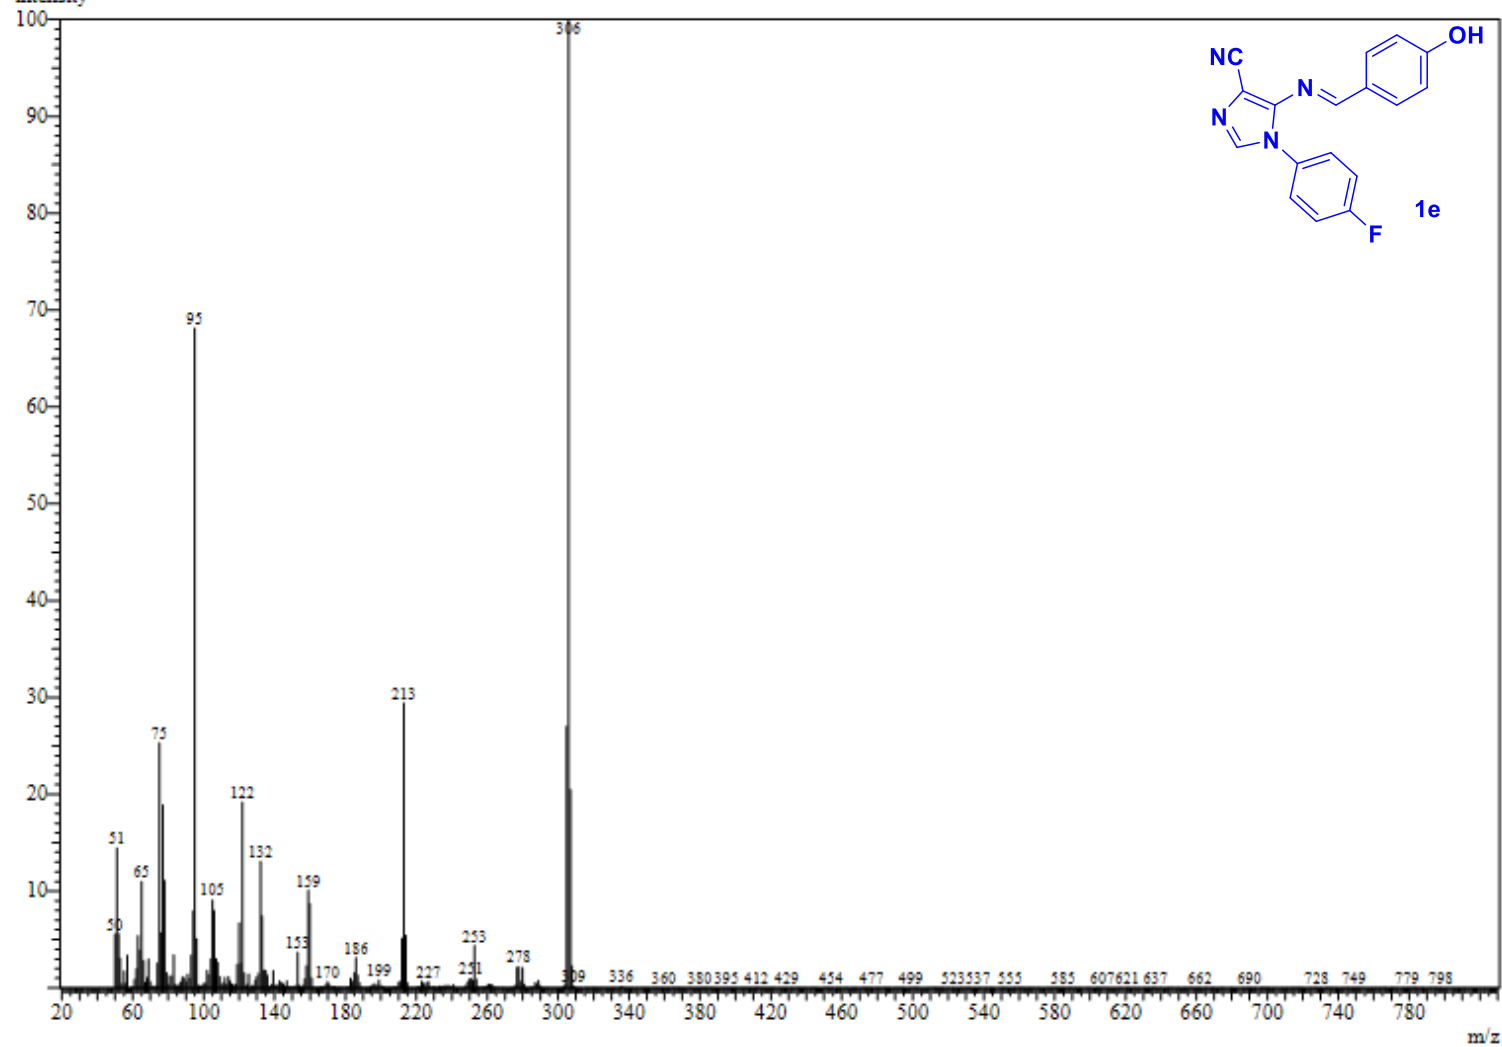

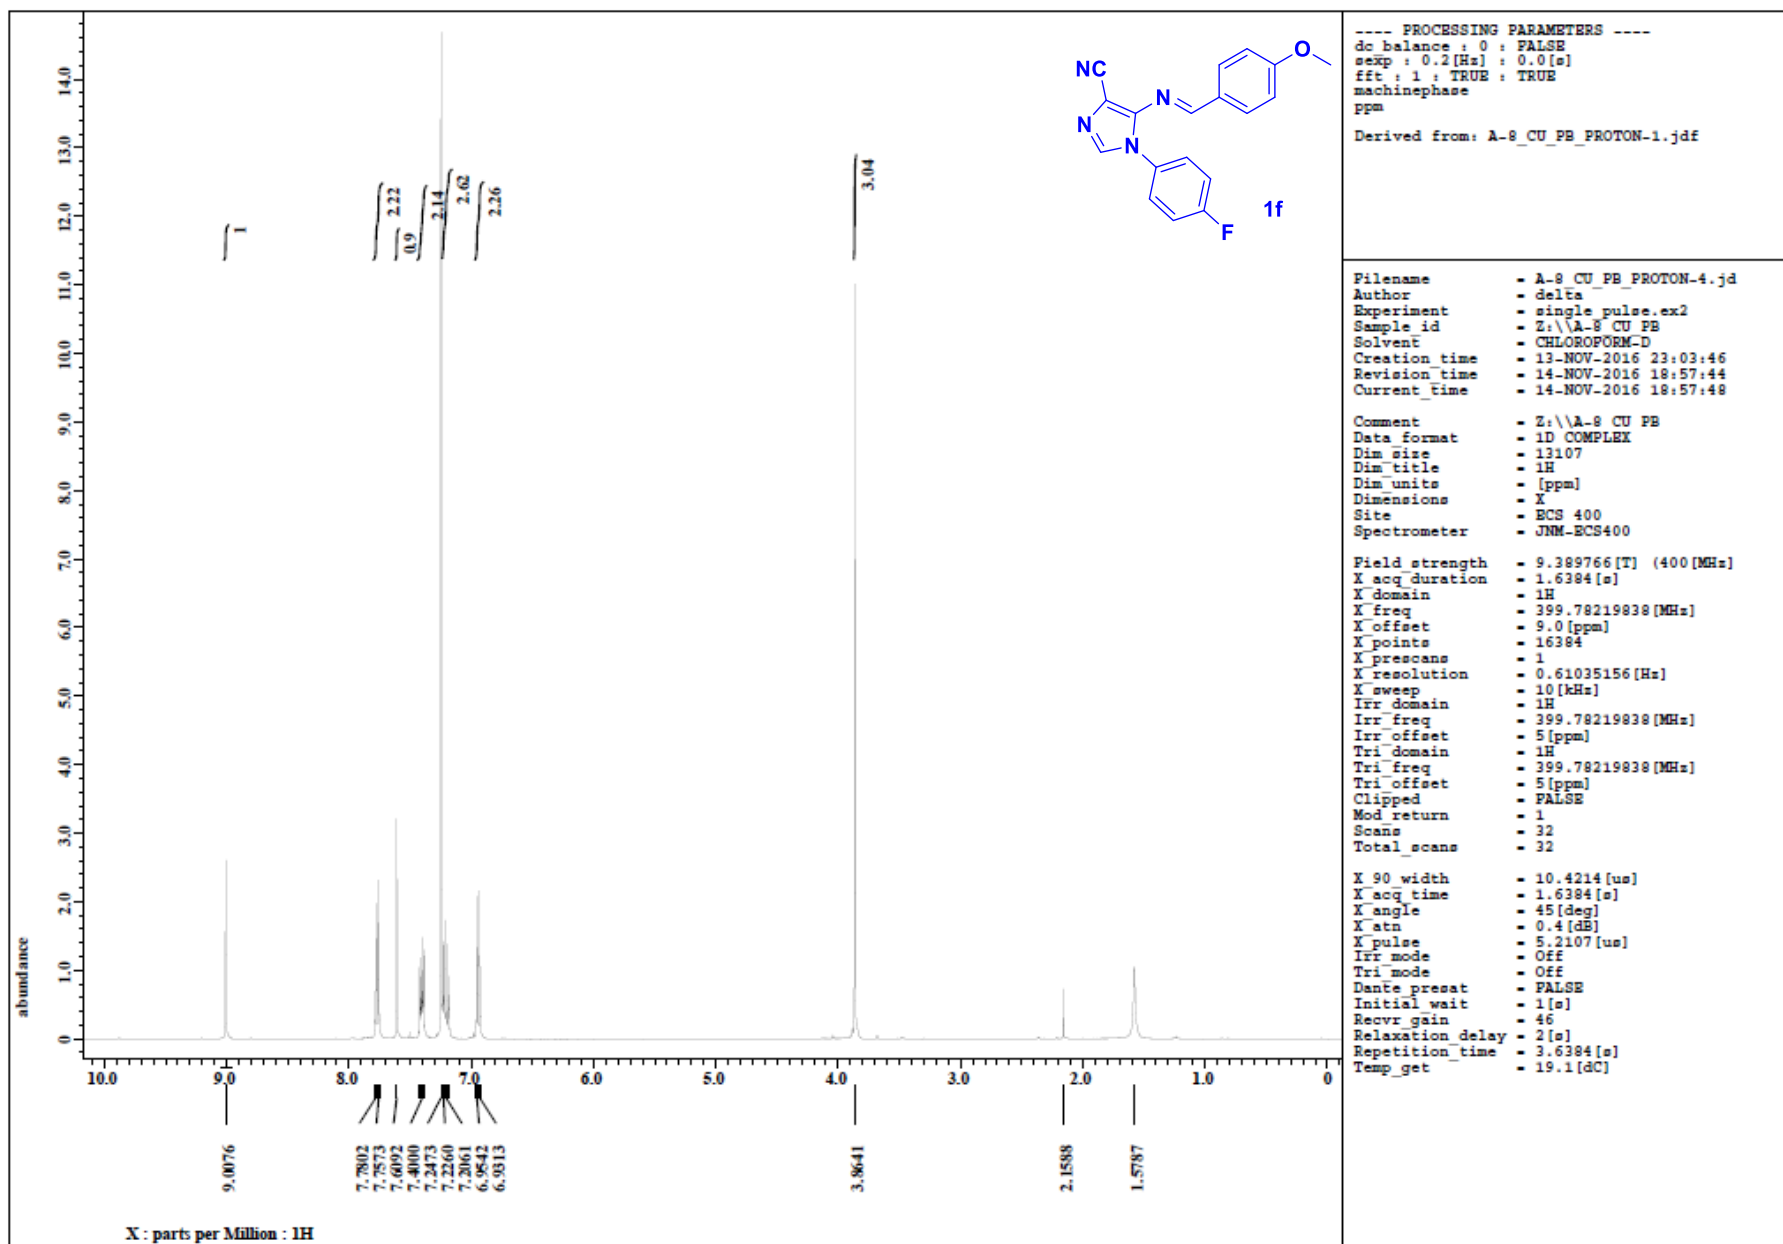

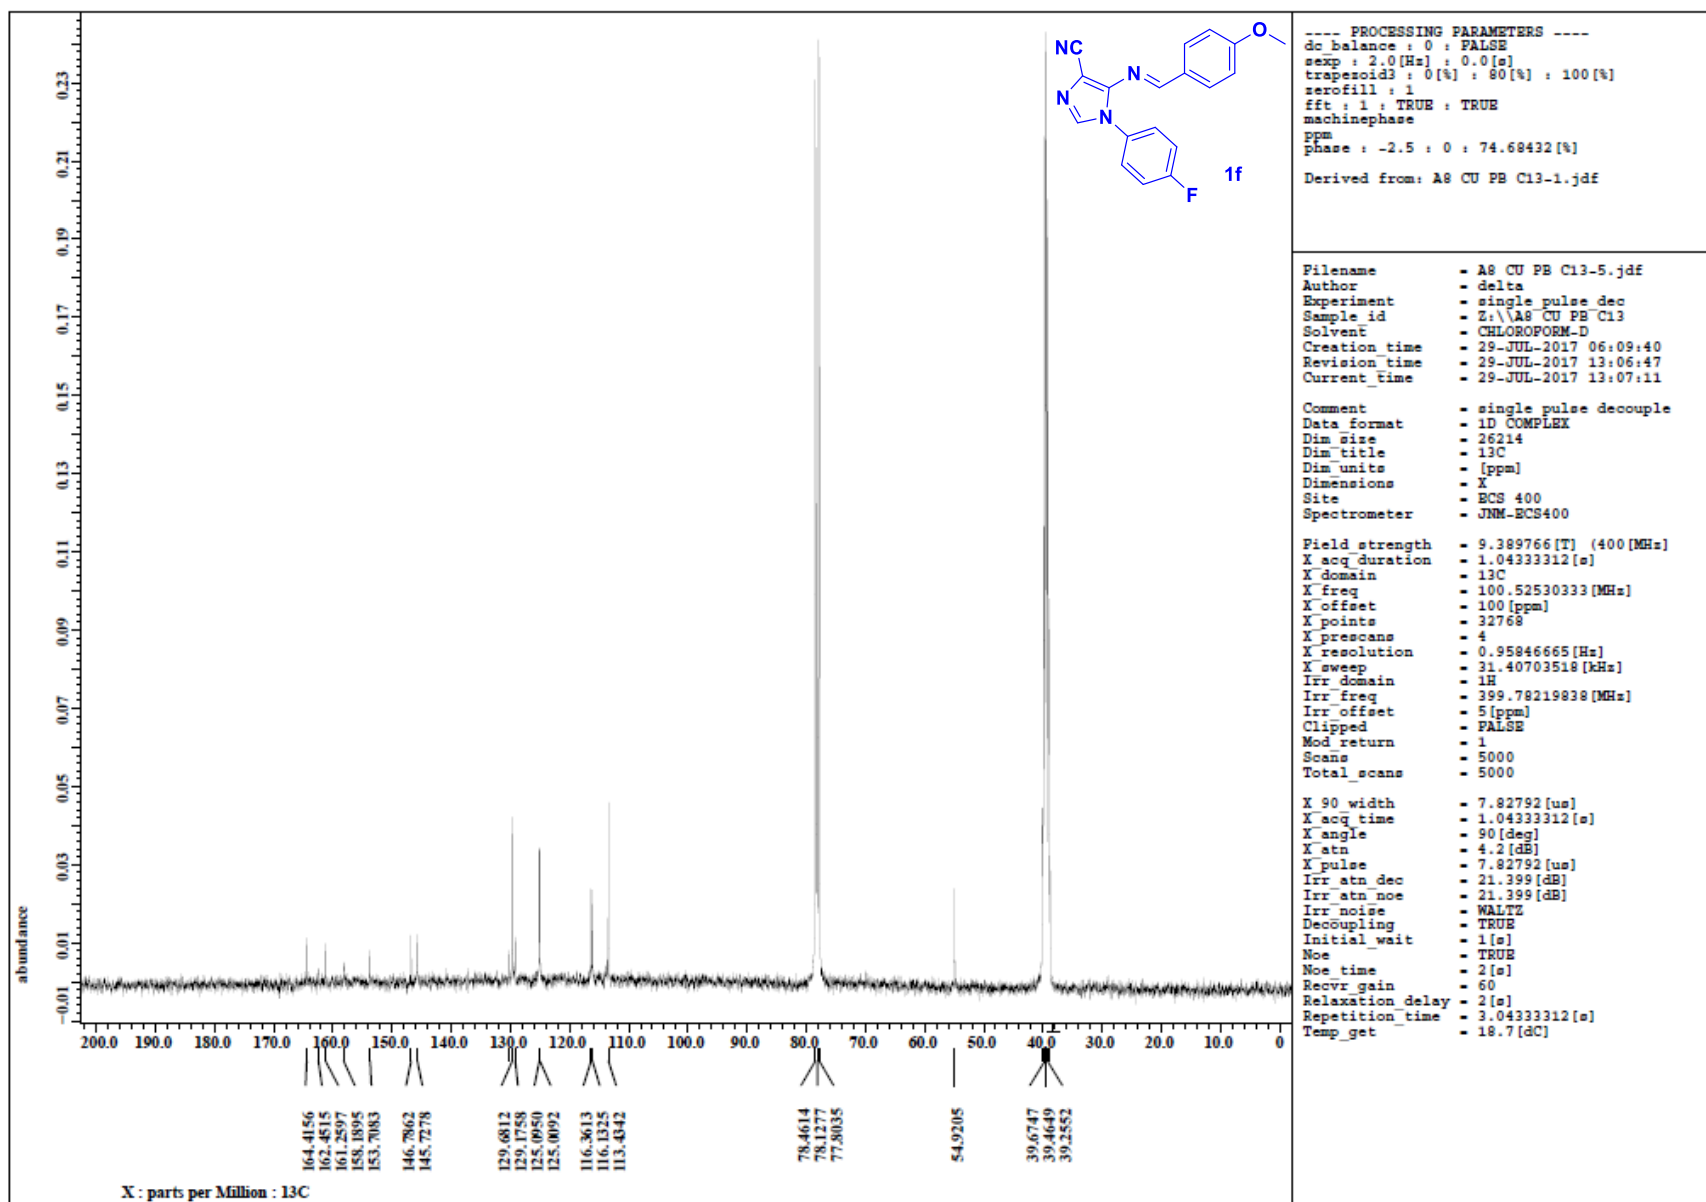

# Spectrum

Line#:1 R.Time:7.815(Scan#:1264)

MassPeaks:479

RawMode:Averaged 7.810-7.820(1263-1265) BasePeak:363(347447)

BG Mode:Calc. from Peak Group 1 - Event 1

intensity

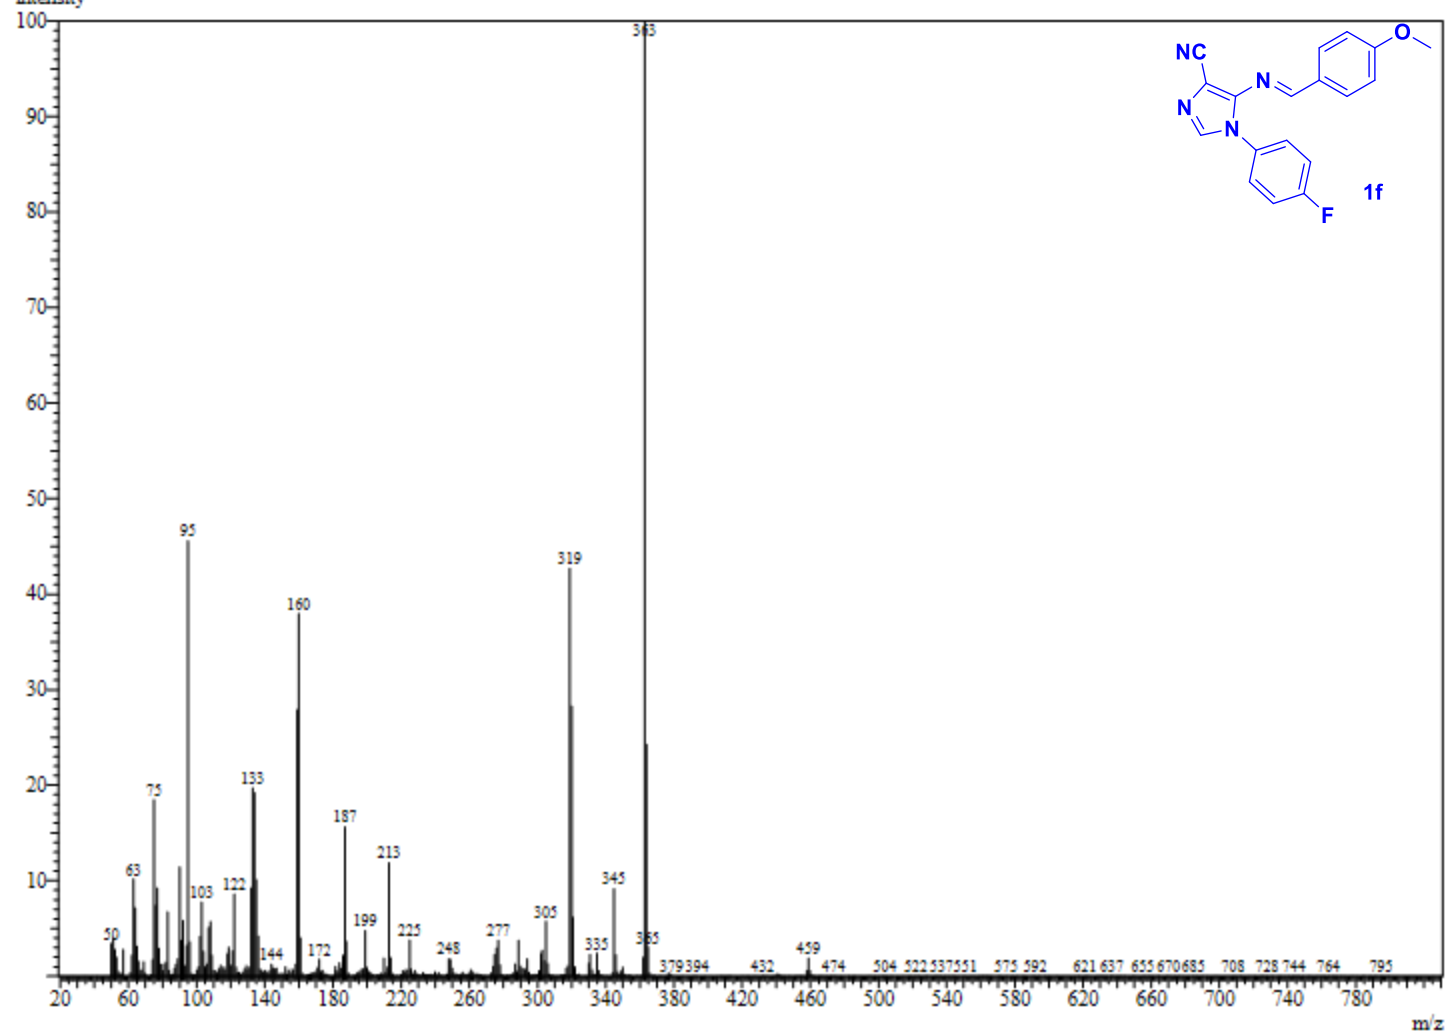

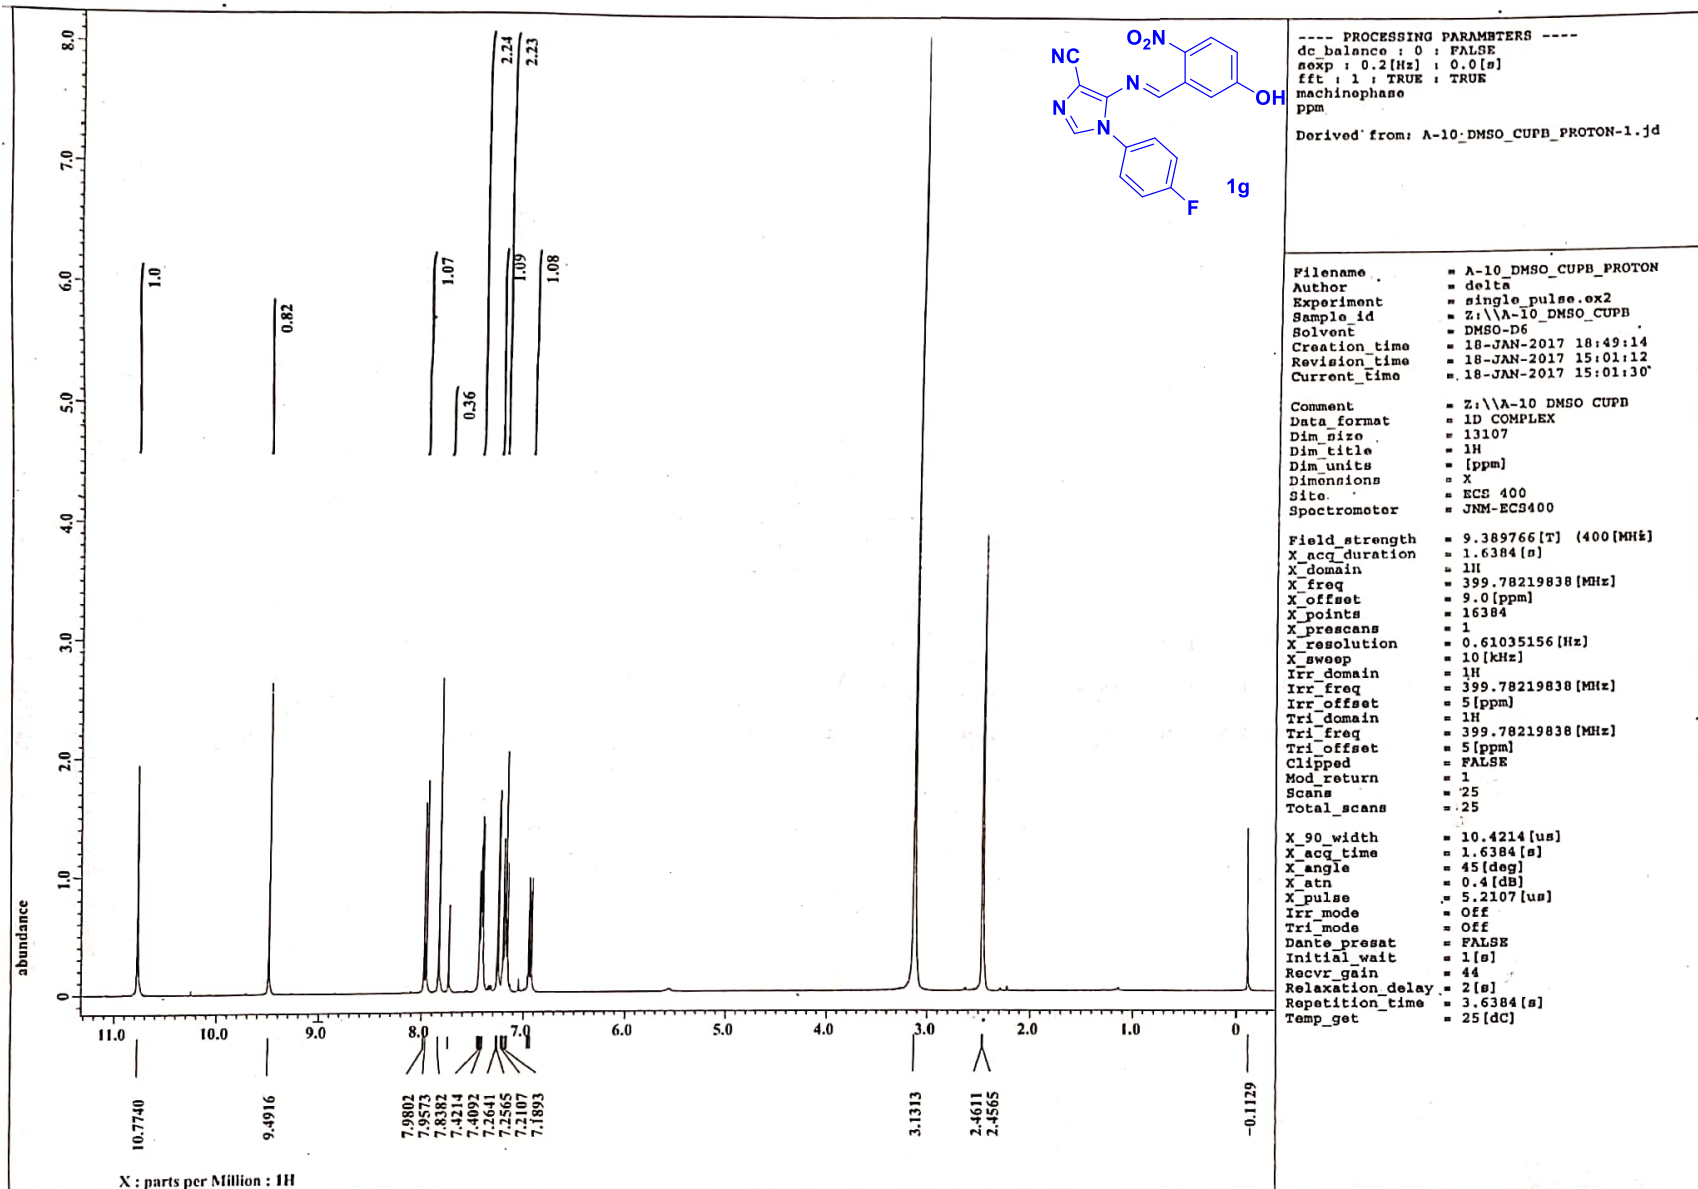

## Elemental Composition Report

Page 1

### Single Mass Analysis

Tolerance = 6.0 PPM / DBE: min = -1.5, max = 50.0

Element prediction: Off

Number of isotope peaks used for i-FIT = 5

Monoisotopic Mass, Even Electron Ions

40 formula(e) evaluated with 1 results within limits (up to 50 best isotopic matches for each mass)

Elements Used:

C: 9-19 H: 11-30 N: 0-5 O: 0-3 F: 0-1

Sample Name : A-10

IITRPR

XEVO G2-XS QTOF

Test Name : HRMS-1

160120-A-10 17 (0.174)

1: TOF MS ES+  
3.04e+007

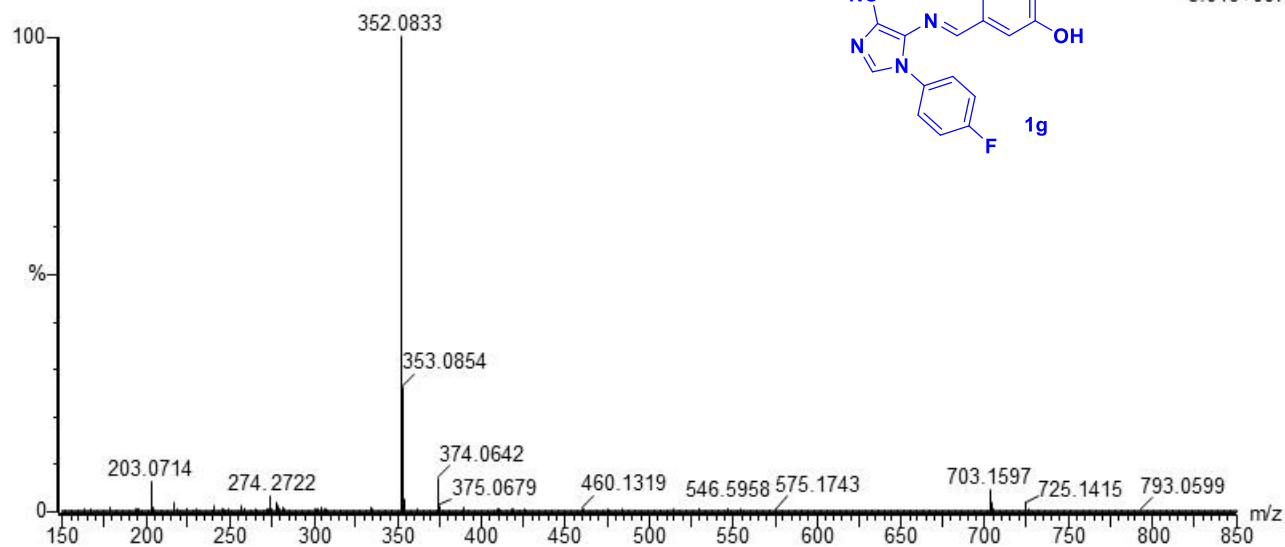

Minimum: -1.5  
Maximum: 5.0 6.0 50.0

| Mass     | Calc. Mass | mDa  | PPM  | DBE  | i-FIT  | Norm | Conf(%) | Formula         |
|----------|------------|------|------|------|--------|------|---------|-----------------|
| 352.0833 | 352.0846   | -1.3 | -3.7 | 14.5 | 1530.9 | n/a  | n/a     | C17 H11 N5 O3 F |

# Spectrum

Line#:1 R.Time:2.155(Scan#:132)

MassPeaks:430

RawMode:Averaged 2.150-2.160(131-133) BasePeak:127(43367)

BGMode:Calc. from Peak Group 1 - Event 1

intensity

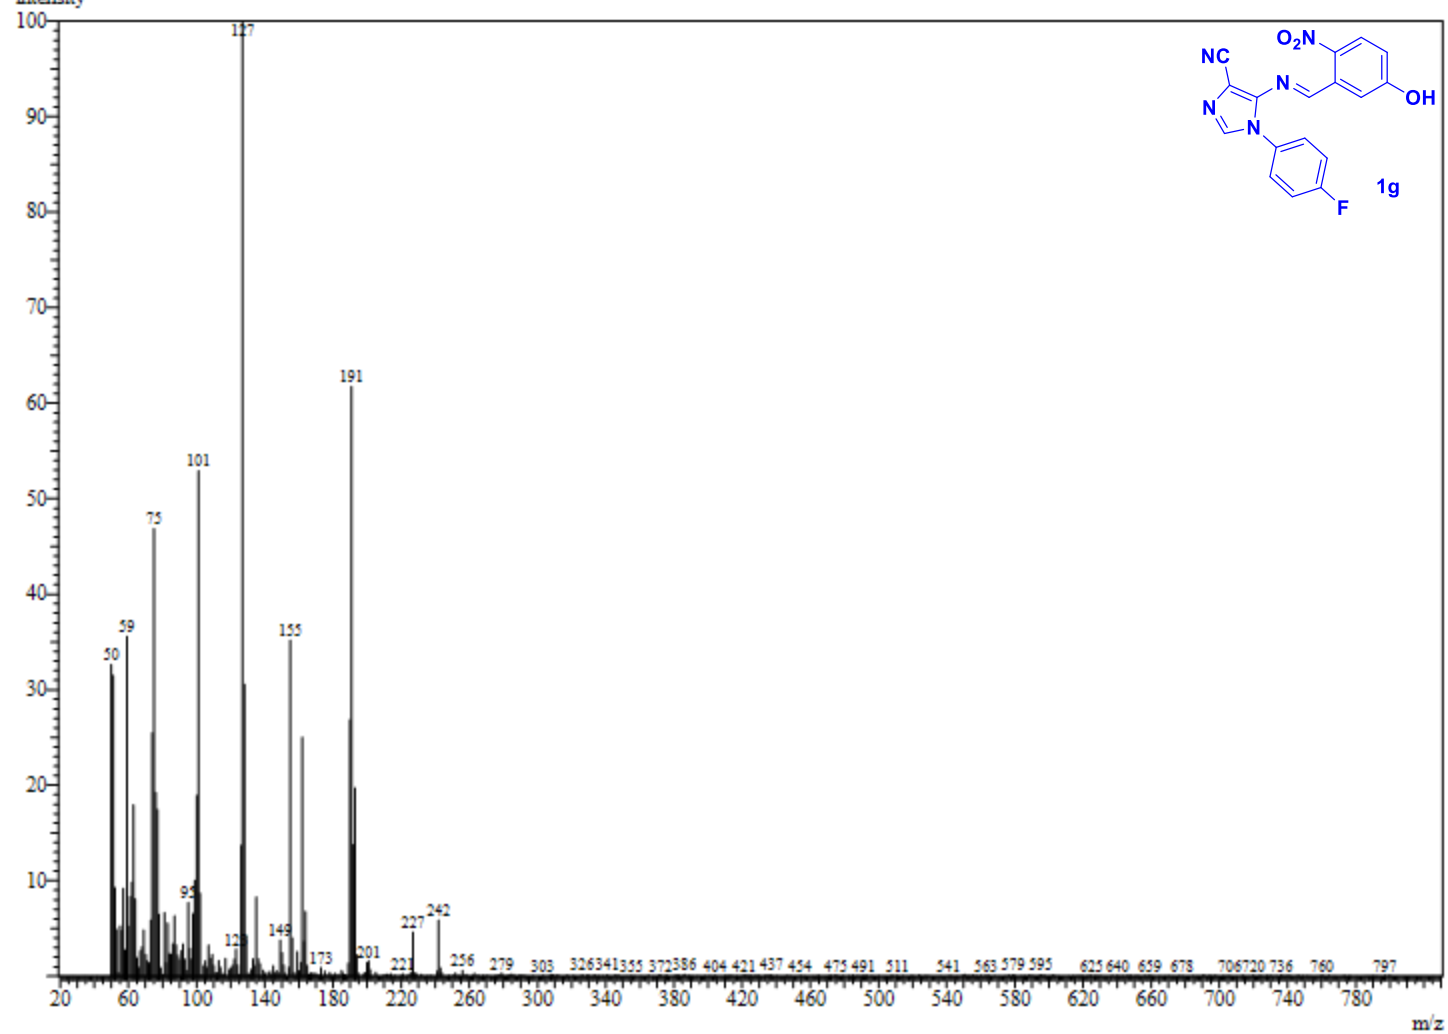

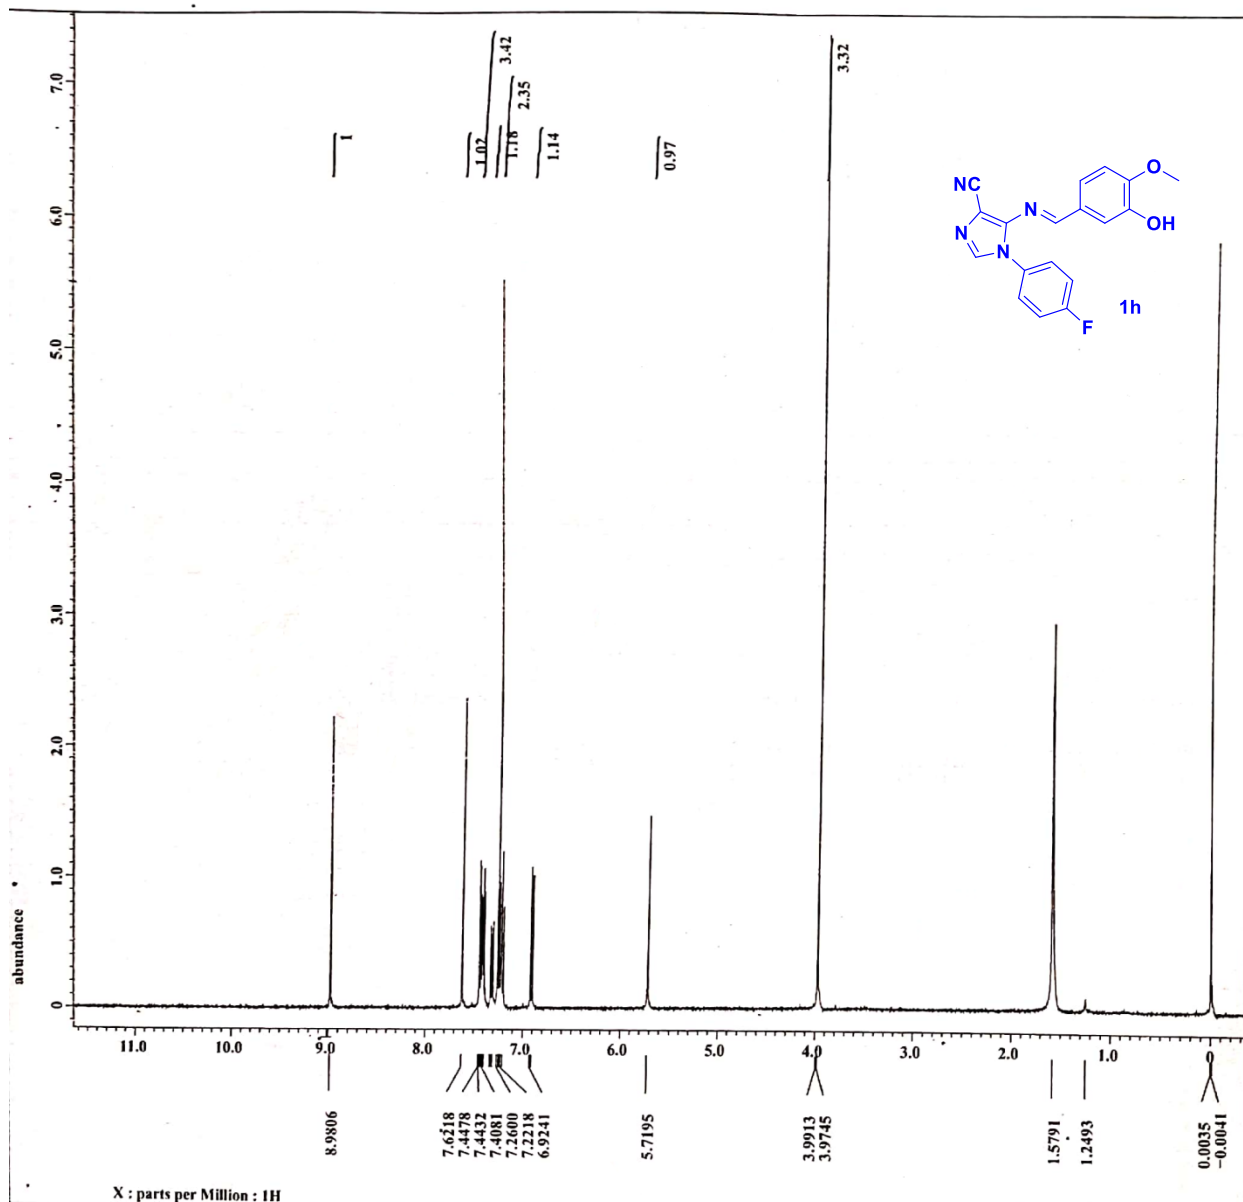

----- PROCESSING PARAMETERS -----  
 dc\_balance : 0 : FALSE  
 sexp : 0.2 [Hz] : 0.0 [s]  
 fft : 1 : TRUE : TRUE  
 machinephase  
 ppm  
 Derived from: A-11\_CUPB\_PROTON-1.jdf

Filename = A-11\_CUPB\_PROTON-4.jd  
 Author = delta  
 Experiment = single\_pulse.ex2  
 Sample\_id = Z:\\A-11\_CUPB  
 Solvent = CHLOROFORM-D  
 Creation\_time = 18-JAN-2017 17:19:05  
 Revision\_time = 18-JAN-2017 14:09:44  
 Current\_time = 18-JAN-2017 14:09:52

Comment = Z:\\A-11\_CUPB  
 Data\_format = 1D\_COMPLEX  
 Dim\_size = 13107  
 Dim\_title = 1H  
 Dim\_units = [ppm]  
 Dimensions = X  
 Site = ECS 400  
 Spectrometer = JNM-ECS400

Field\_strength = 9.389766 [T] (400 [MHz])  
 X\_acq\_duration = 1.6384 [s]  
 X\_domain = 1H  
 X\_freq = 399.78219838 [MHz]  
 X\_offset = 9.0 [ppm]  
 X\_points = 16384  
 X\_prescans = 1  
 X\_resolution = 0.61035156 [Hz]  
 X\_sweep = 10 [kHz]  
 Irr\_domain = 1H  
 Irr\_freq = 399.78219838 [MHz]  
 Irr\_offset = 5 [ppm]  
 Tri\_domain = 1H  
 Tri\_freq = 399.78219838 [MHz]  
 Tri\_offset = 5 [ppm]  
 Clipped = FALSE  
 Mod\_return = 1  
 Scans = 3  
 Total\_scans = 3

X\_90\_width = 10.4214 [us]  
 X\_acq\_time = 1.6384 [s]  
 X\_angle = 45 [deg]  
 X\_atn = 0.4 [dB]  
 X\_pulse = 5.2107 [us]  
 Irr\_mode = Off  
 Tri\_mode = Off  
 Dante\_preset = FALSE  
 Initial\_wait = 1 [s]  
 Recvr\_gain = 50  
 Relaxation\_delay = 2 [s]  
 Repetition\_time = 3.6384 [s]  
 Temp\_get = 18.1 [dC]

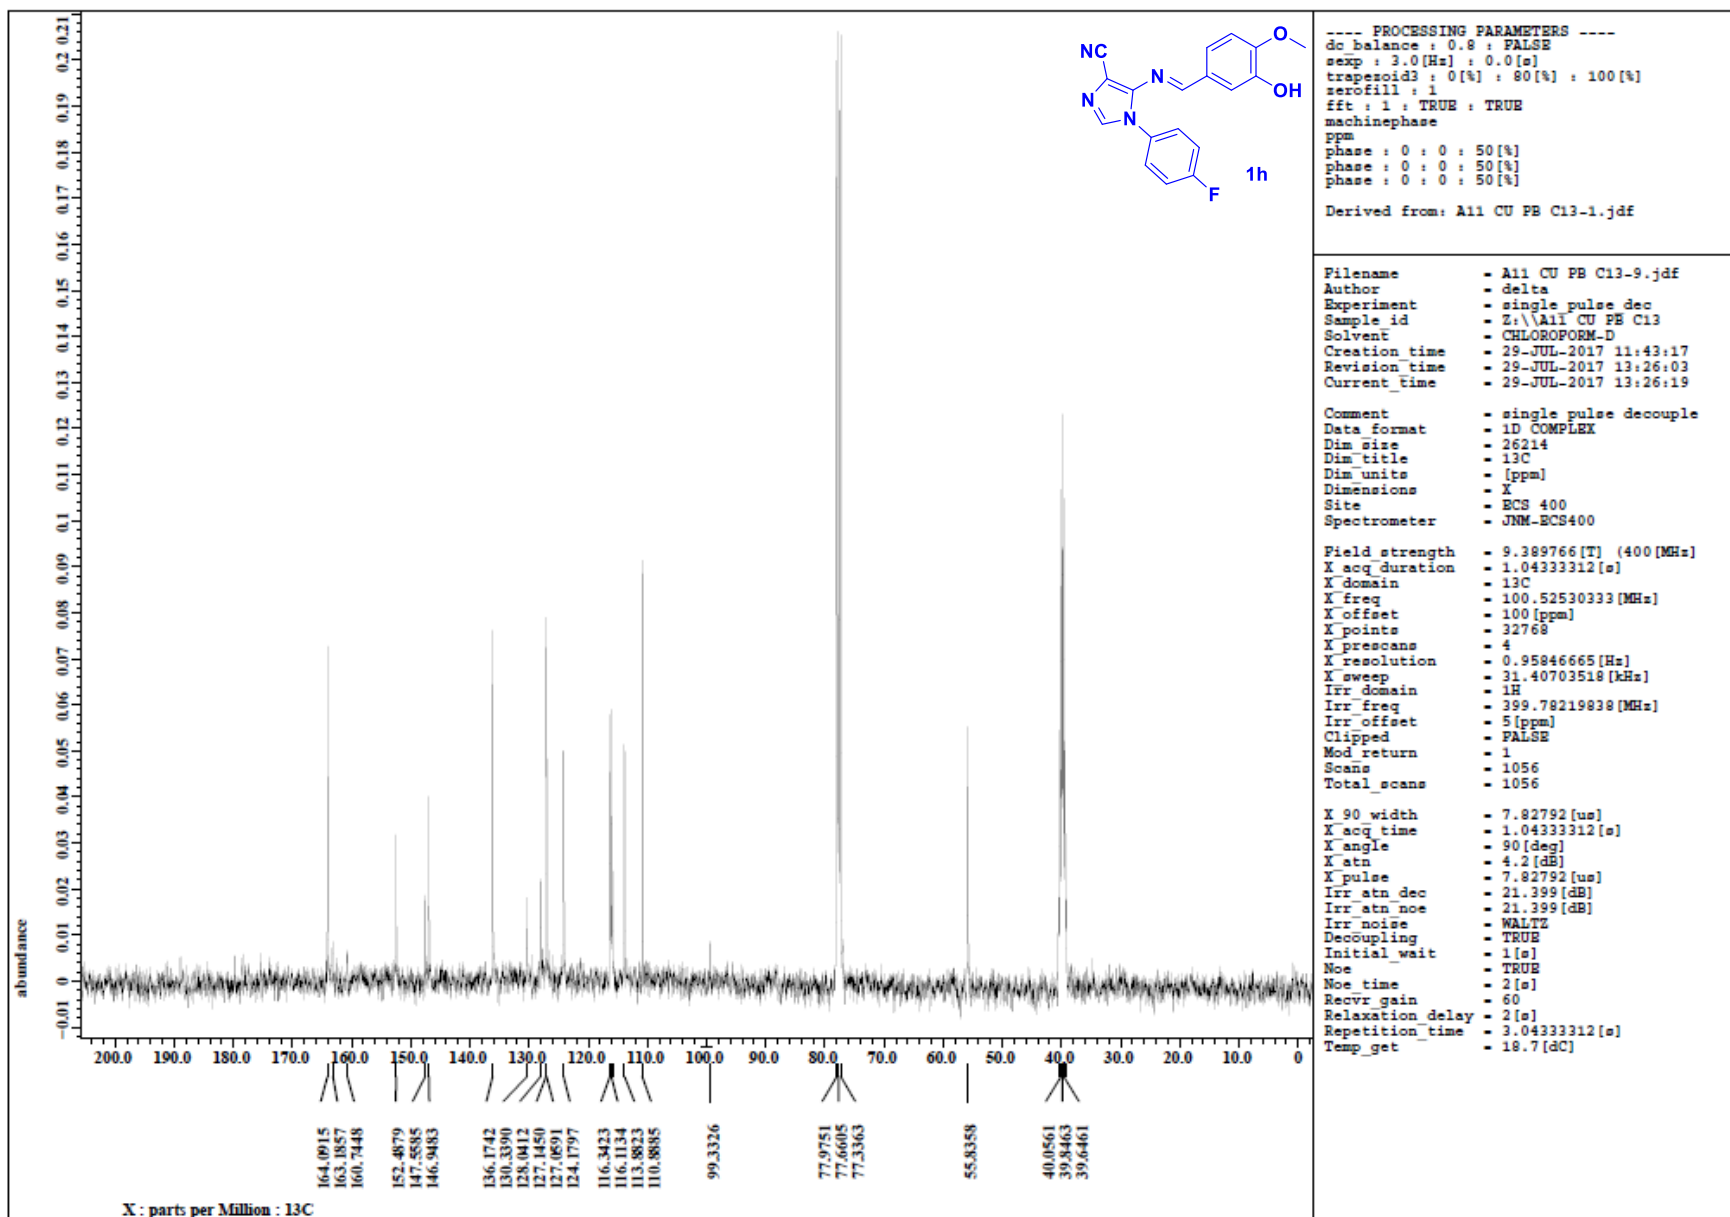

## Elemental Composition Report

Page 1

### Single Mass Analysis

Tolerance = 6.0 PPM / DBE: min = -1.5, max = 50.0

Element prediction: Off

Number of isotope peaks used for i-FIT = 5

Monoisotopic Mass, Even Electron Ions

43 formula(e) evaluated with 1 results within limits (up to 50 best isotopic matches for each mass)

Elements Used:

C: 9-19 H: 11-30 N: 0-5 O: 0-3 F: 0-1

Sample Name : A-11

IITRPR

XEVO G2-XS QTOF

Test Name : HRMS-1

160120-A-11 17 (0.174)

1: TOF MS ES+

3.46e+007

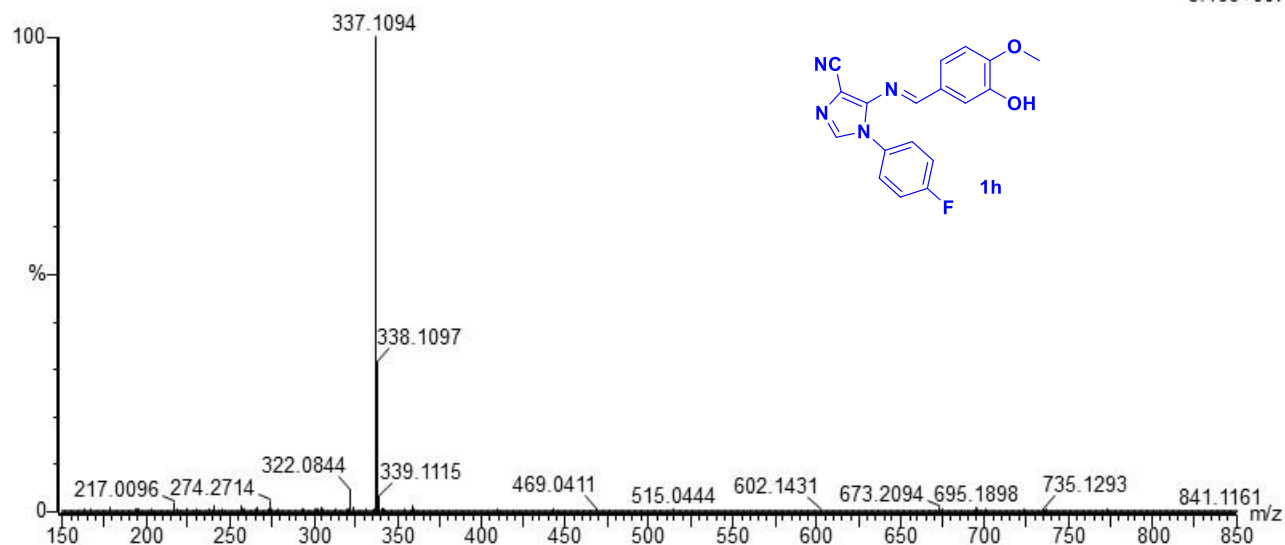

Minimum:

-1.5

Maximum:

5.0 6.0 50.0

| Mass | Calc. Mass | mDa | PPM | DBE | i-FIT | Norm | Conf(%) | Formula |
|------|------------|-----|-----|-----|-------|------|---------|---------|
|------|------------|-----|-----|-----|-------|------|---------|---------|

|          |          |      |      |      |        |     |     |                 |
|----------|----------|------|------|------|--------|-----|-----|-----------------|
| 337.1094 | 337.1101 | -0.7 | -2.1 | 13.5 | 2165.1 | n/a | n/a | C18 H14 N4 O2 F |
|----------|----------|------|------|------|--------|-----|-----|-----------------|

# Spectrum

Line#:1 R.Time:6.180(Scan#:937)

MassPeaks:522

RawMode:Averaged 6.175-6.185(936-938) BasePeak:336(307885)

BG Mode:Calc. from Peak Group 1 - Event 1

intensity

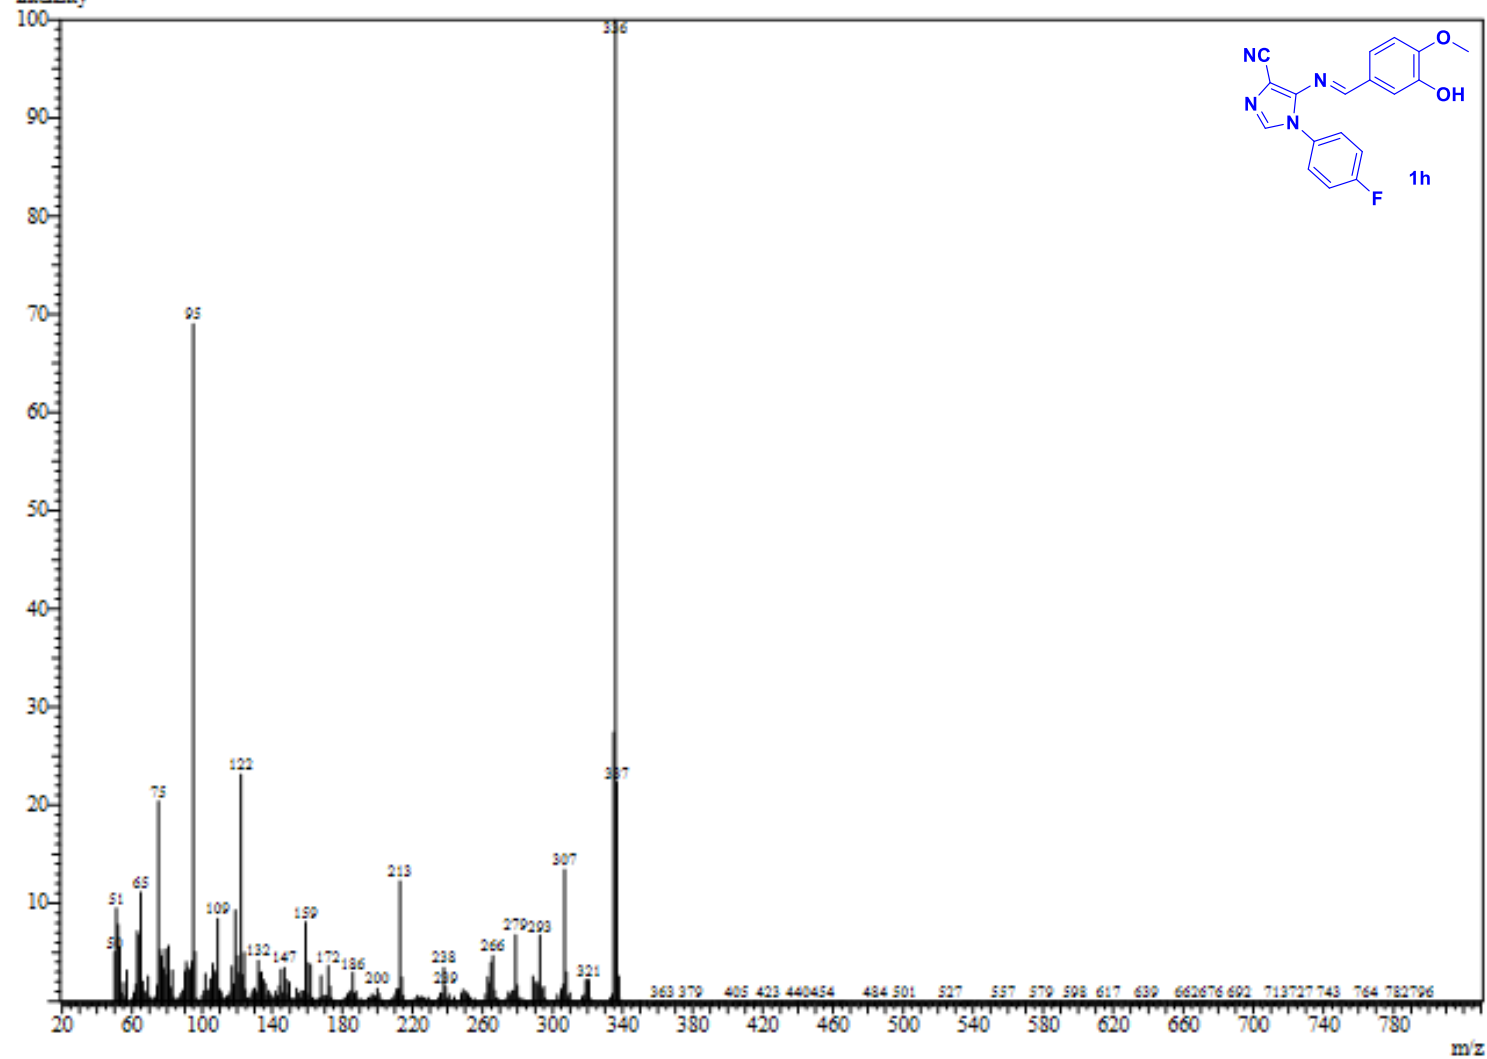

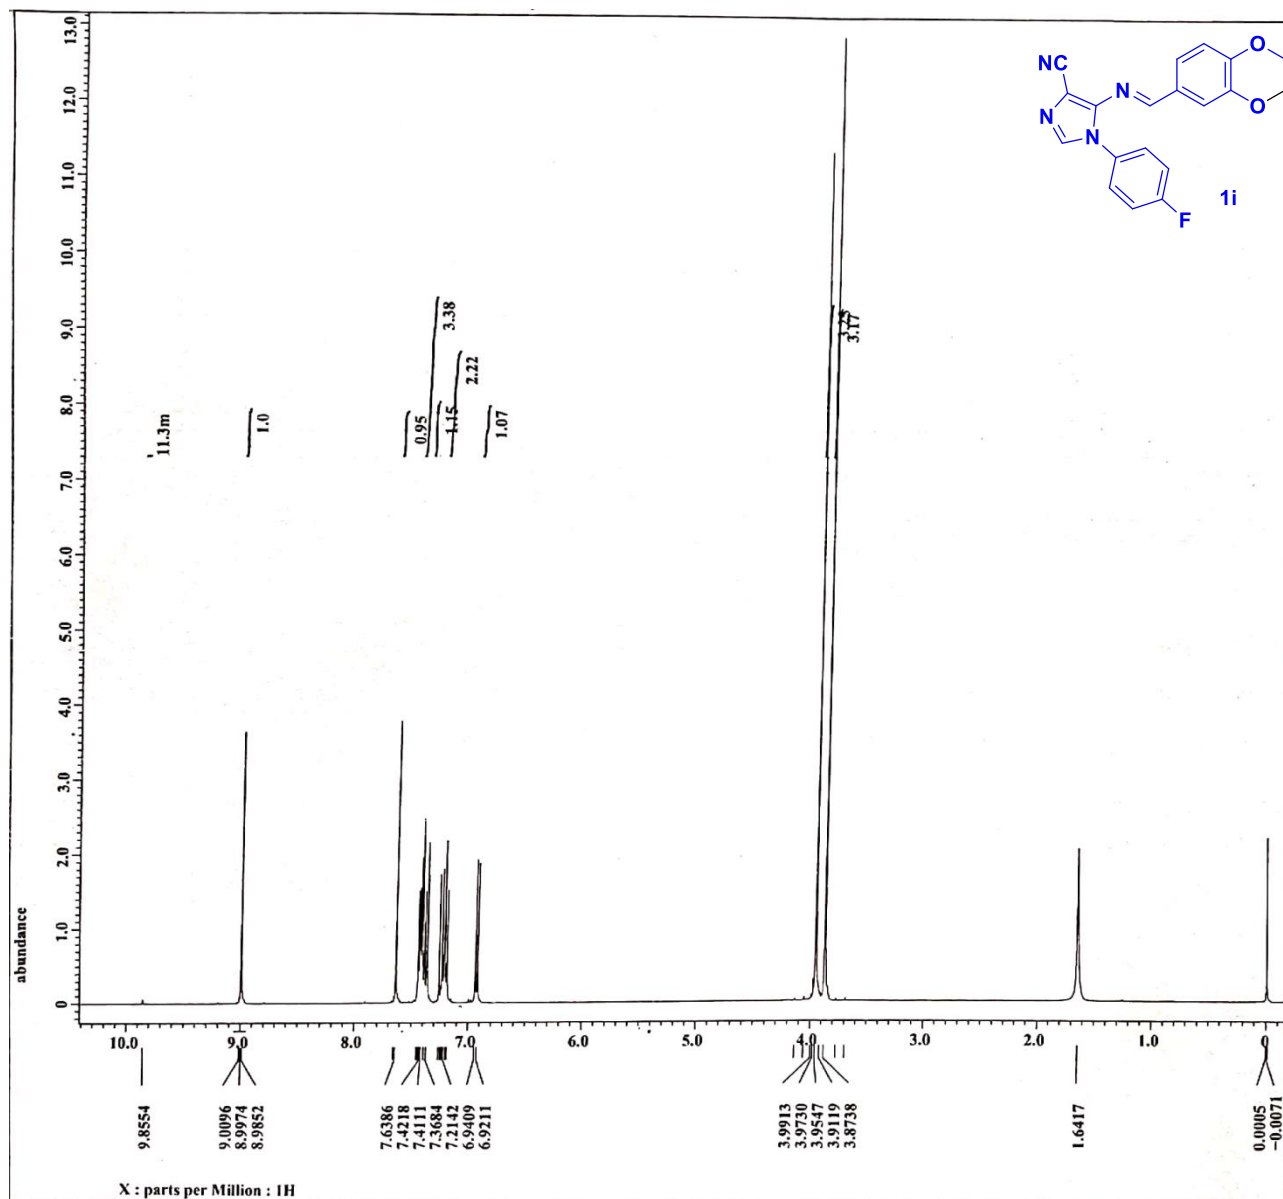

----- PROCESSING PARAMETERS -----  
 dc\_balance : 0 : FALSE  
 secp : 0.2[Hz] : 0.0[s]  
 fft : 1 : TRUE : TRUE  
 machinephase  
 ppm  
 Derived from: A-12\_CU\_PB\_PROTON-1.jdf

Filename = A-12\_CU\_PB\_PROTON-4.j  
 Author = delta  
 Experiment = single\_pulse.ex2  
 Sample\_id = Z:\A-12\_CU\_PB  
 Solvent = CHLOROFORM-D  
 Creation\_time = 17-JAN-2017 21:30:56  
 Revision\_time = 17-JAN-2017 19:00:11  
 Current\_time = 17-JAN-2017 19:00:21

Comment = Z:\A-12\_CU\_PB  
 Data\_format = 1D\_COMPLEX  
 Dim\_size = 13107  
 Dim\_title = 1H  
 Dim\_units = [ppm]  
 Dimensions = X  
 Site = ECS 400  
 Spectrometer = JNM-ECS400

Field\_strength = 9.389766[T] (400[MHz])  
 X\_acq\_duration = 1.6384[s]  
 X\_domain = 1H  
 X\_freq = 399.78219838[MHz]  
 X\_offset = 9.0[ppm]  
 X\_points = 16384  
 X\_prescans = 1  
 X\_resolution = 0.61035156[Hz]  
 X\_sweep = 10[kHz]  
 X\_domain = 1H  
 Irr\_freq = 399.78219838[MHz]  
 Irr\_offset = 5[ppm]  
 Tri\_domain = 1H  
 Tri\_freq = 399.78219838[MHz]  
 Tri\_offset = 5[ppm]  
 Clipped = FALSE  
 Mod\_return = 1  
 Scans = 32  
 Total\_scans = 32

X\_90\_width = 10.4214[us]  
 X\_acq\_time = 1.6384[s]  
 X\_angle = 45[deg]  
 X\_atn = 0.4[dB]  
 X\_pulse = 5.2107[us]  
 Irr\_mode = Off  
 Tri\_mode = Off  
 Dante\_presat = FALSE  
 Initial\_wait = 1[s]  
 Recvr\_gain = 44  
 Relaxation\_delay = 2[s]  
 Repetition\_time = 3.6384[s]  
 Temp\_get = 18.5[dc]

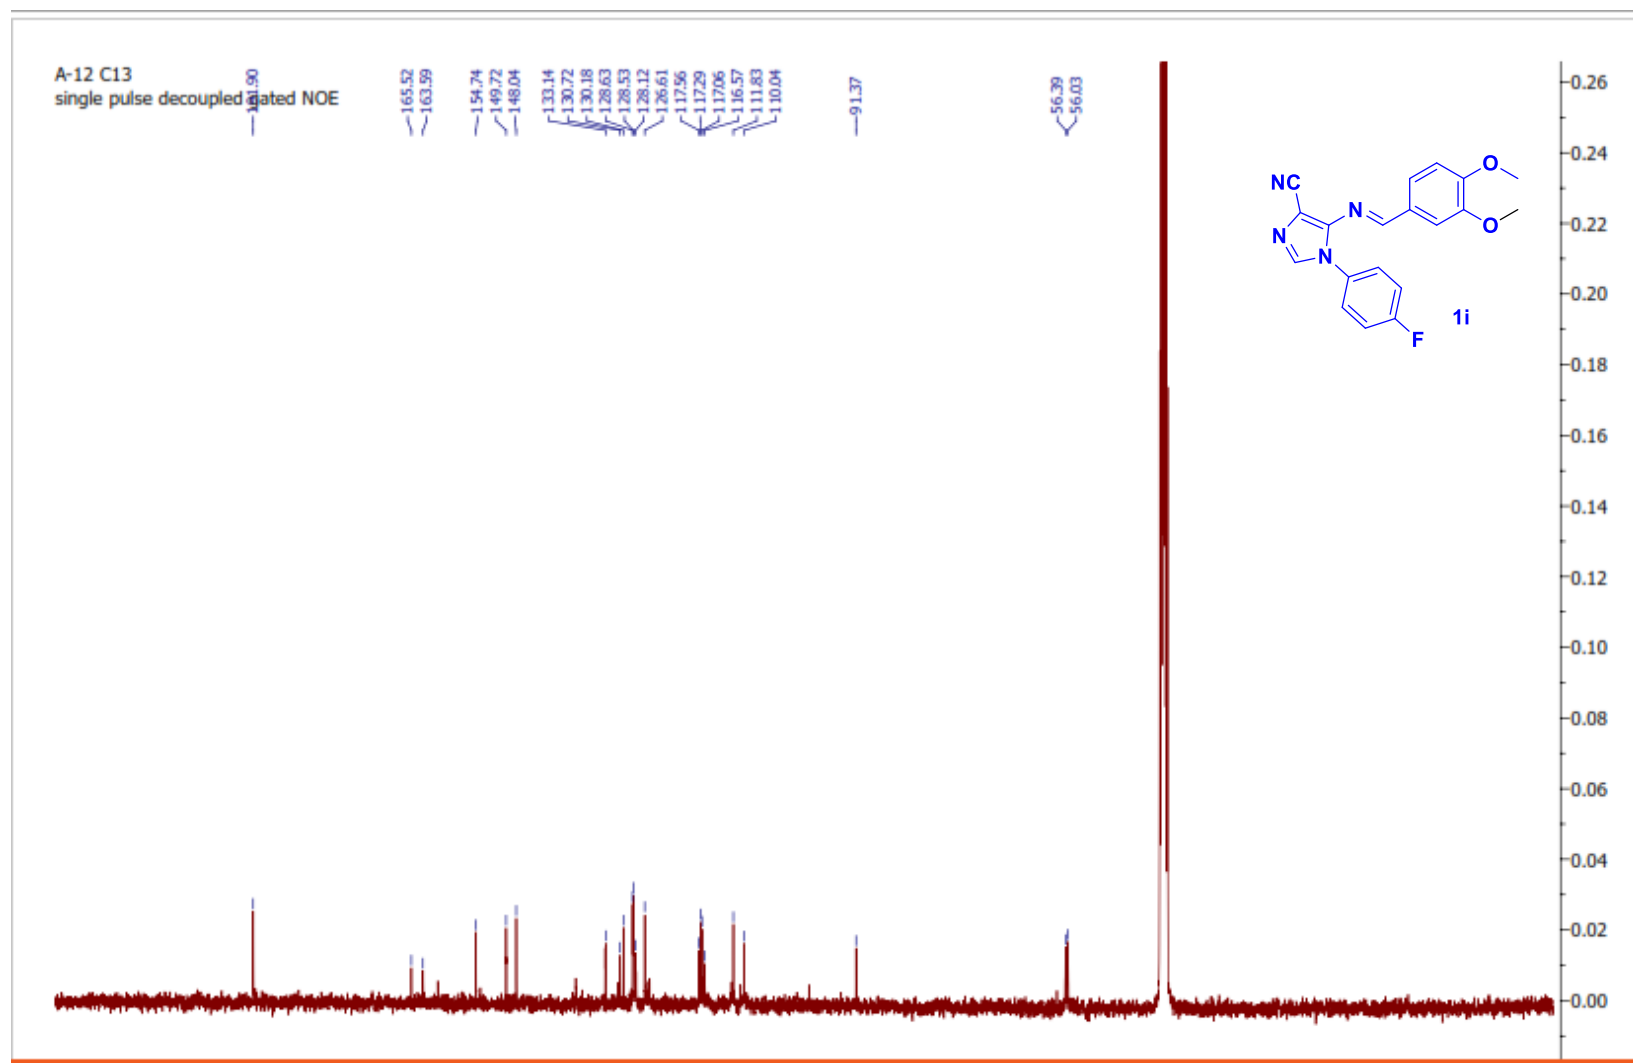

# Elemental Composition Report

Page 1

## Single Mass Analysis

Tolerance = 6.0 PPM / DBE: min = -1.5, max = 50.0

Element prediction: Off

Number of isotope peaks used for i-FIT = 5

Monoisotopic Mass, Even Electron Ions

40 formula(e) evaluated with 1 results within limits (up to 50 best isotopic matches for each mass)

Elements Used:

C: 9-19 H: 11-30 N: 0-5 O: 0-3 F: 0-1

Sample Name : A-12

IITRPR

XEVO G2-XS QTOF

Test Name : HRMS-1

160120-A-12 17 (0.174)

1: TOF MS ES+

4.64e+007

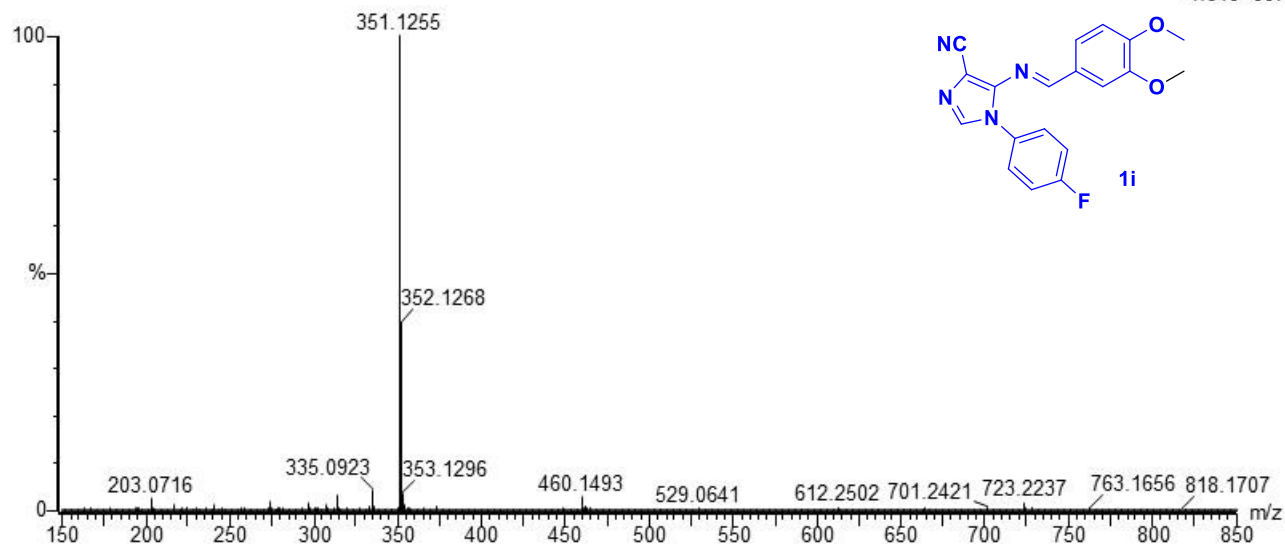

Minimum: -1.5  
Maximum: 5.0 6.0 50.0

| Mass     | Calc. Mass | mDa  | PPM  | DBE  | i-FIT  | Norm | Conf(%) | Formula                                                         |
|----------|------------|------|------|------|--------|------|---------|-----------------------------------------------------------------|
| 351.1255 | 351.1257   | -0.2 | -0.6 | 13.5 | 1738.3 | n/a  | n/a     | C <sub>19</sub> H <sub>16</sub> N <sub>4</sub> O <sub>2</sub> F |

Sample Name : A-12  
Test Name : HRMS-1

INDIAN INSTITUTE OF TECHNOLOGY  
ROPAR

XEVO G2-XS QTOF

1: TOF MS ES+  
8.57e7

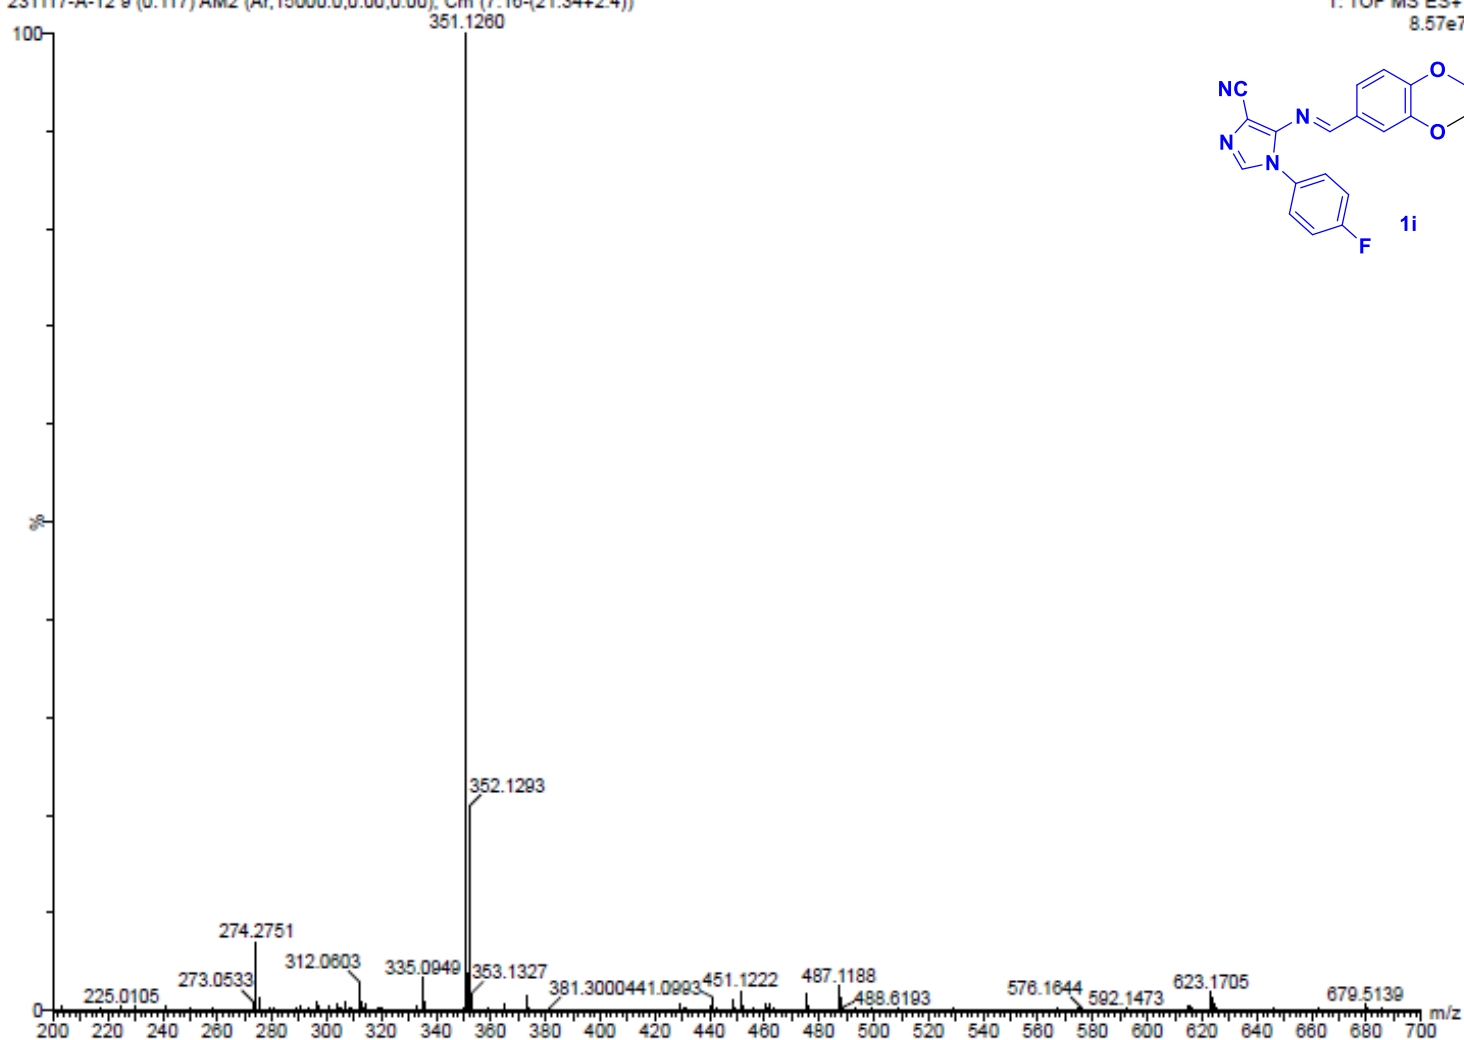

# Spectrum

Line#:1 R.Time:7.425(Scan#:1186)

MassPeaks:583

RawMode:Averaged 7.420-7.430(1185-1187) BasePeak:380(6661844)

BG Mode:Calc. from Peak Group 1 - Event 1

intensity

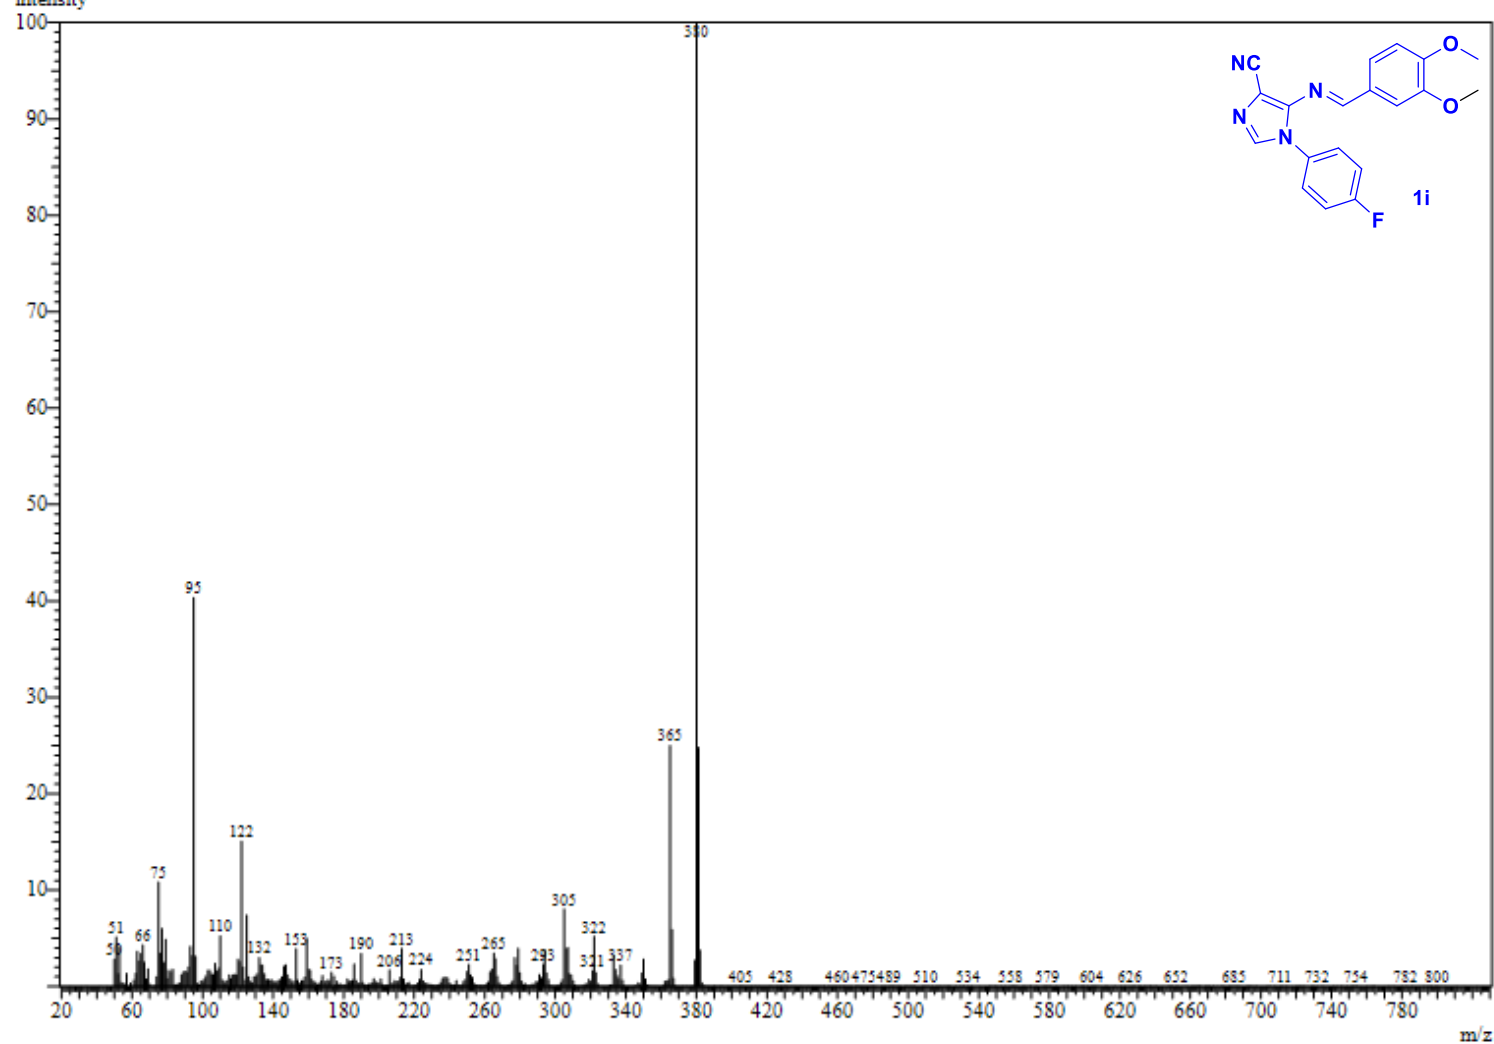

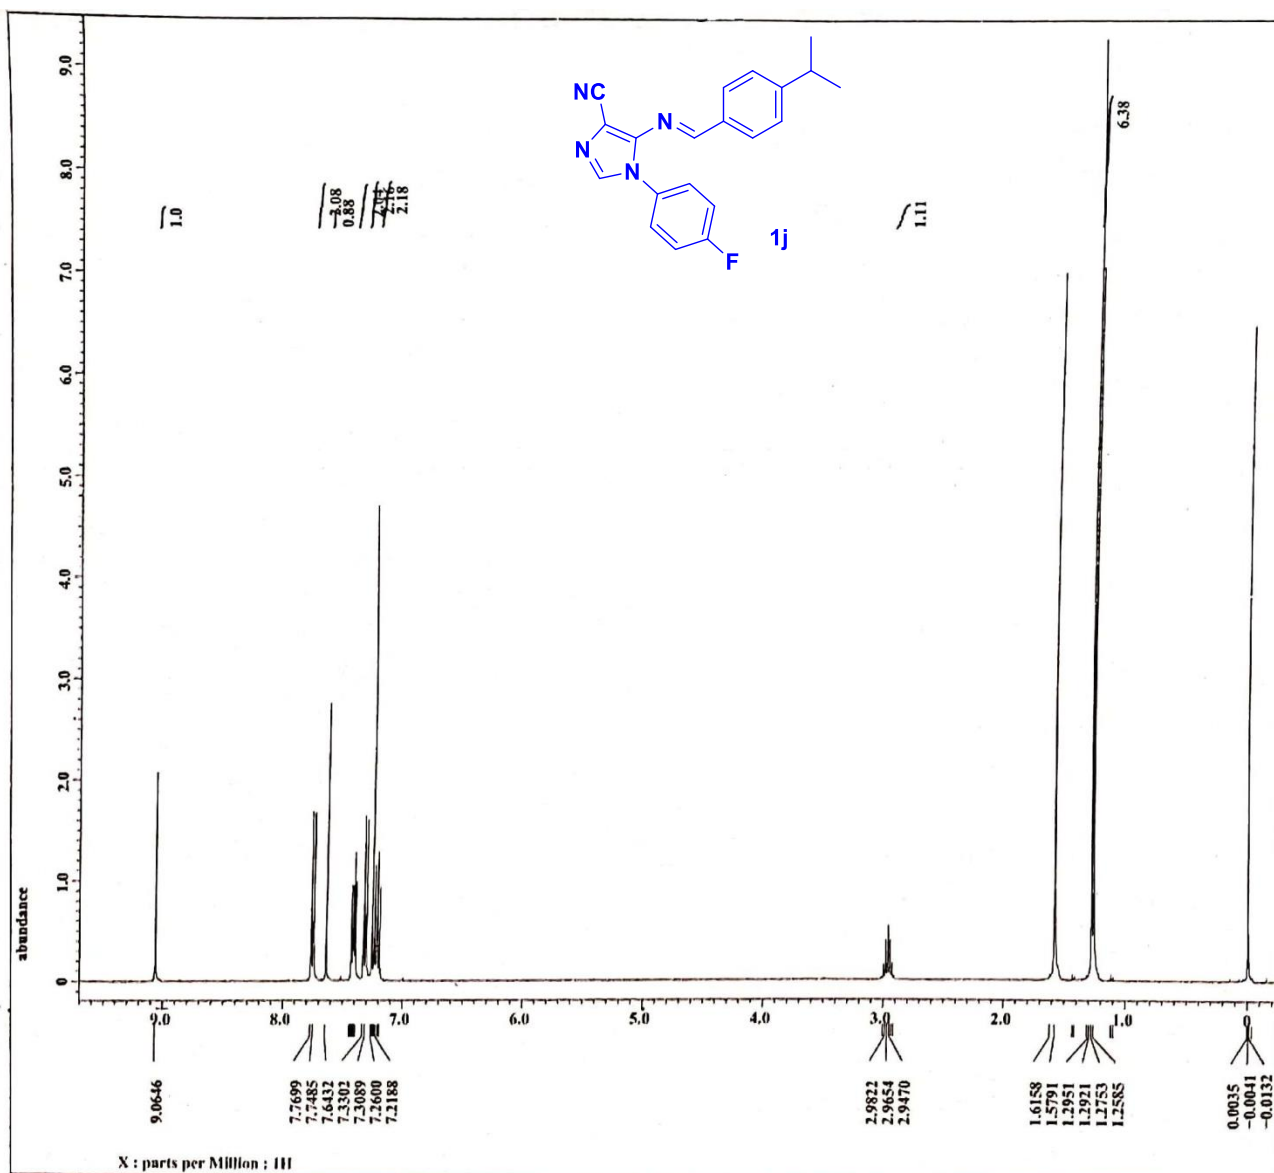

----- PROCESSING PARAMETERS -----  
 dc balance : 0 : FALSE  
 sexp : 0.2[Hz] : 0.0[s]  
 fft : 1 : TRUE : TRUE  
 machinephase  
 ppm  
 Derived from: A-14\_CU\_PB\_PROTON-1.jdf

Filename = A-14\_CU\_PB\_PROTON-4.j  
 Author = delta  
 Experiment = single\_pulse.ex2  
 Sample\_id = Z:\A-14\_CU\_PB  
 Solvent = CHLOROFORM-D  
 Creation\_time = 17-JAN-2017 21:41:16  
 Revision\_time = 17-JAN-2017 19:02:15  
 Current\_time = 17-JAN-2017 19:02:24

Comment = Z:\A-14\_CU\_PB  
 Data format = 1D COMPLEX  
 Dim\_size = 13107  
 Dim\_title = 1H  
 Dim\_units = [ppm]  
 Dimensions = X  
 Site = ECS 400  
 Spectrometer = JNM-ECS400

Field\_strength = 9.389766[T] (400[MHz])  
 X\_acq\_duration = 1.6384[s]  
 X\_domain = 1H  
 X\_freq = 399.78219838[MHz]  
 X\_offset = 9.0[ppm]  
 X\_points = 16384  
 X\_prescans = 1  
 X\_resolution = 0.61035156[Hz]  
 X\_sweep = 10[kHz]  
 Irr\_domain = 1H  
 Irr\_freq = 399.78219838[MHz]  
 Irr\_offset = 5[ppm]  
 Tri\_domain = 1H  
 Tri\_freq = 399.78219838[MHz]  
 Tri\_offset = 5[ppm]  
 Clipped = FALSE  
 Mod\_return = 1  
 Scans = 32  
 Total\_scans = 32

X\_90\_width = 10.4214[us]  
 X\_acq\_time = 1.6384[s]  
 X\_angle = 45[deg]  
 X\_atn = 0.4[db]  
 X\_pulse = 5.2107[us]  
 Irr\_mode = Off  
 Tri\_mode = Off  
 Dante\_preset = FALSE  
 Initial\_wait = 1[s]  
 Recvr\_gain = 50  
 Relaxation\_delay = 2[s]  
 Repetition\_time = 3.6384[s]  
 Temp\_get = 18[dc]

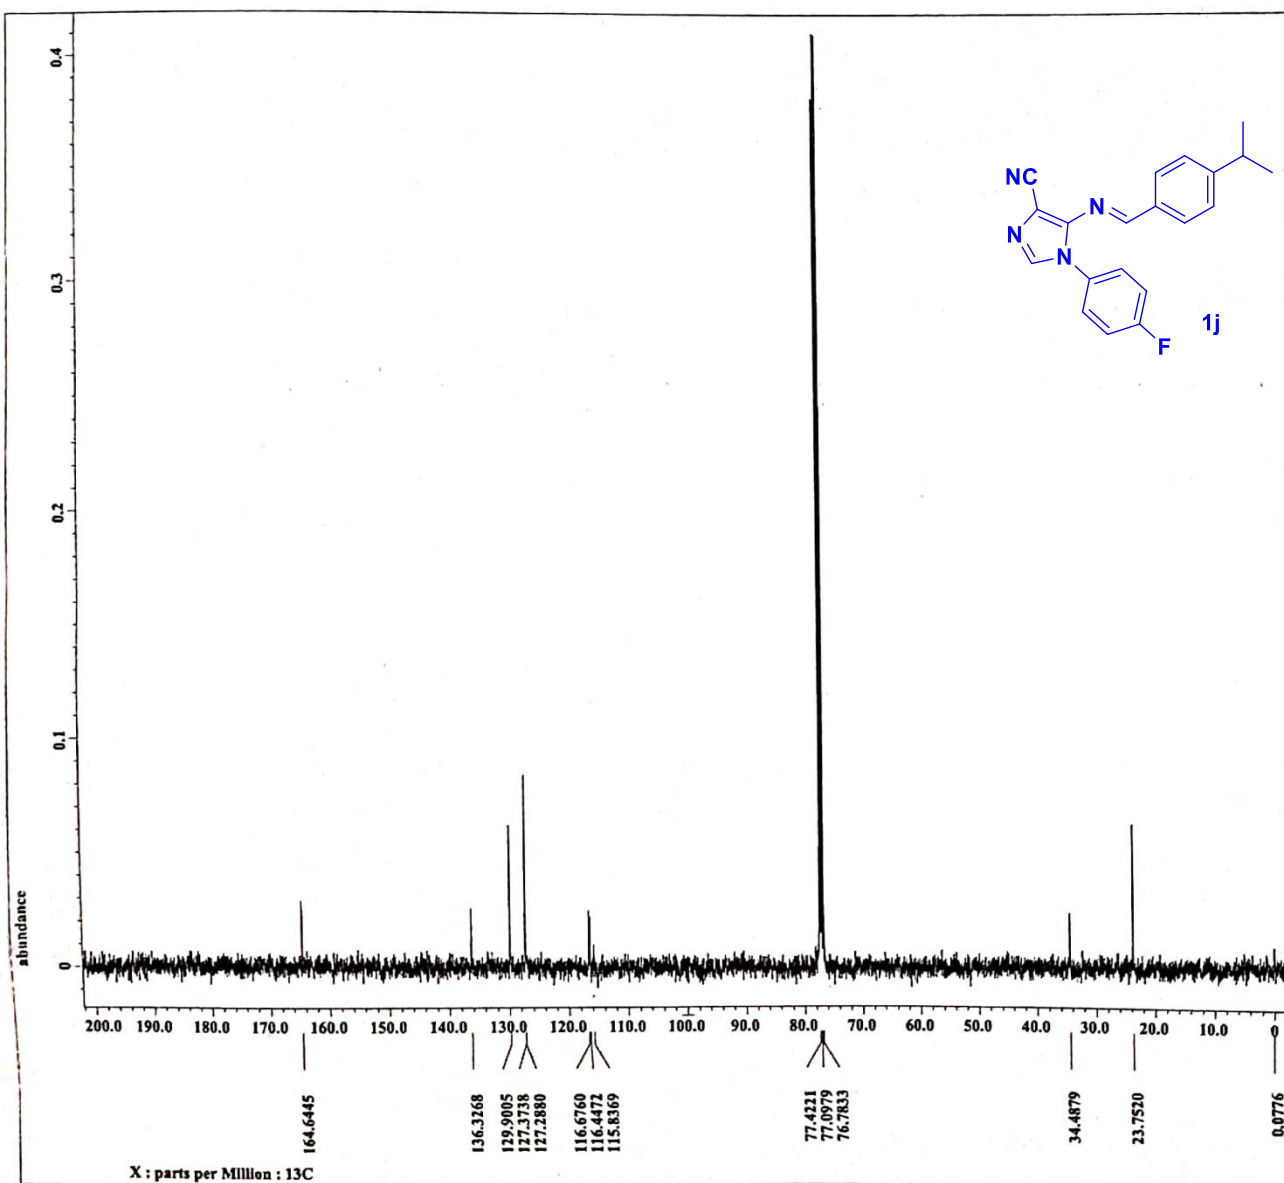

----- PROCESSING PARAMETERS -----  
 dc\_balance : 0 : FALSE  
 sexp : 2.0[Hz] : 0.0[s]  
 trapexoid3 : 0[%] : 80[%] : 100[%]  
 zerofill : 1  
 fft : 1 : TRUE : TRUE  
 machinephase  
 ppm  
 Derived from: A-14 CU PB 13C-1.jdf

Filename = A-14 CU PB 13C-4.jdf  
 Author = delta  
 Experiment = single\_pulse\_dec  
 Sample\_id = Z:\A-14 CU PB 13C  
 Solvent = CHLOROFORM-D  
 Creation\_time = 15-JUL-2017 05:56:56  
 Revision\_time = 15-JUL-2017 17:16:33  
 Current\_time = 15-JUL-2017 17:16:45

Comment = single pulse decouple  
 Data format = 1D COMPLEX  
 Dim\_size = 26214  
 Dim\_title = 13C  
 Dim\_units = [ppm]  
 Dimensions = X  
 Site = ECS 400  
 Spectrometer = JNM-ECS400

Field\_strength = 9.389766[T] (400[MHz])  
 X\_acq\_duration = 1.04333312[s]  
 X\_domain = 13C  
 X\_freq = 100.52530333[MHz]  
 X\_offset = 100[ppm]  
 X\_points = 32768  
 X\_prescans = 4  
 X\_resolution = 0.95846665[Hz]  
 X\_sweep = 31.40703518[kHz]  
 Irr\_domain = 1H  
 Irr\_freq = 399.78219838[MHz]  
 Irr\_offset = 5[ppm]  
 Clipped = FALSE  
 Mod\_return = 1  
 Scans = 1000  
 Total\_scans = 1000

X\_90\_width = 7.82792[us]  
 X\_acq\_time = 1.04333312[s]  
 X\_angle = 90[deg]  
 X\_atn = 4.2[dB]  
 X\_pulse = 7.82792[us]  
 Irr\_atn\_dec = 21.399[dB]  
 Irr\_atn\_noe = 21.399[dB]  
 Irr\_noise = WALTZ  
 Decoupling = TRUE  
 Initial\_wait = 1[s]  
 Noe = TRUE  
 Noe\_time = 2[s]  
 Recvr\_gain = 60  
 Relaxation\_delay = 2[s]  
 Repetition\_time = 3.04333312[s]  
 Temp\_get = 19.9[dC]

# Spectrum

Line#:1 R.Time:4.880(Scan#:677)

MassPeaks:519

RawMode:Averaged 4.875-4.885(676-678) BasePeak:332(535382)

BG Mode:Calc. from Peak Group 1 - Event 1

intensity

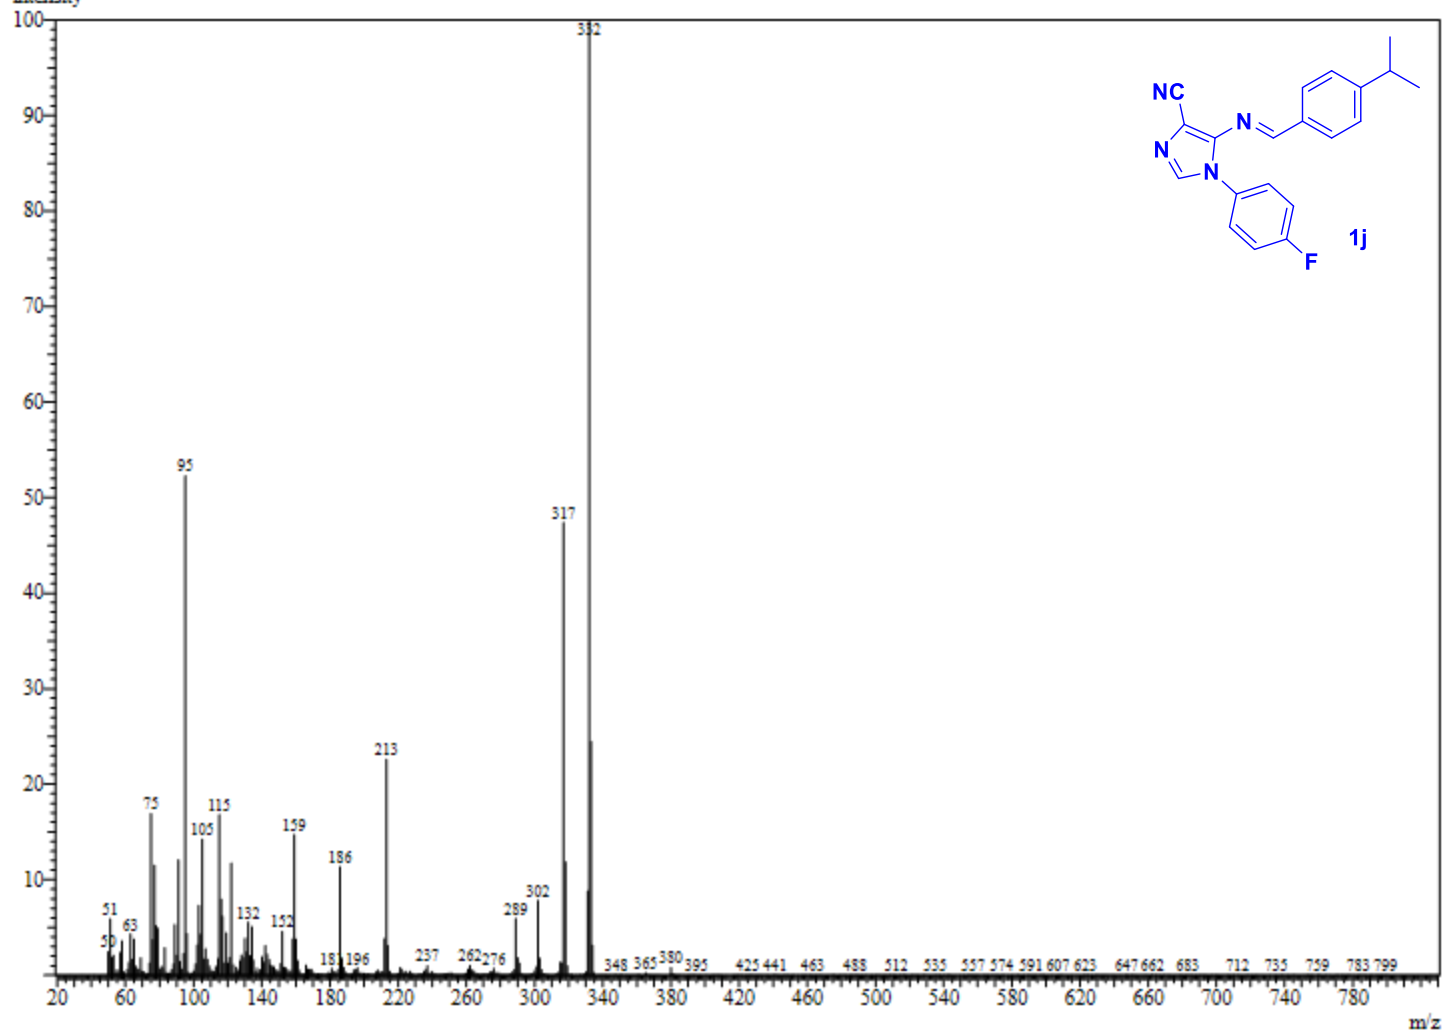

SRK-2 CRYSTALLIZED

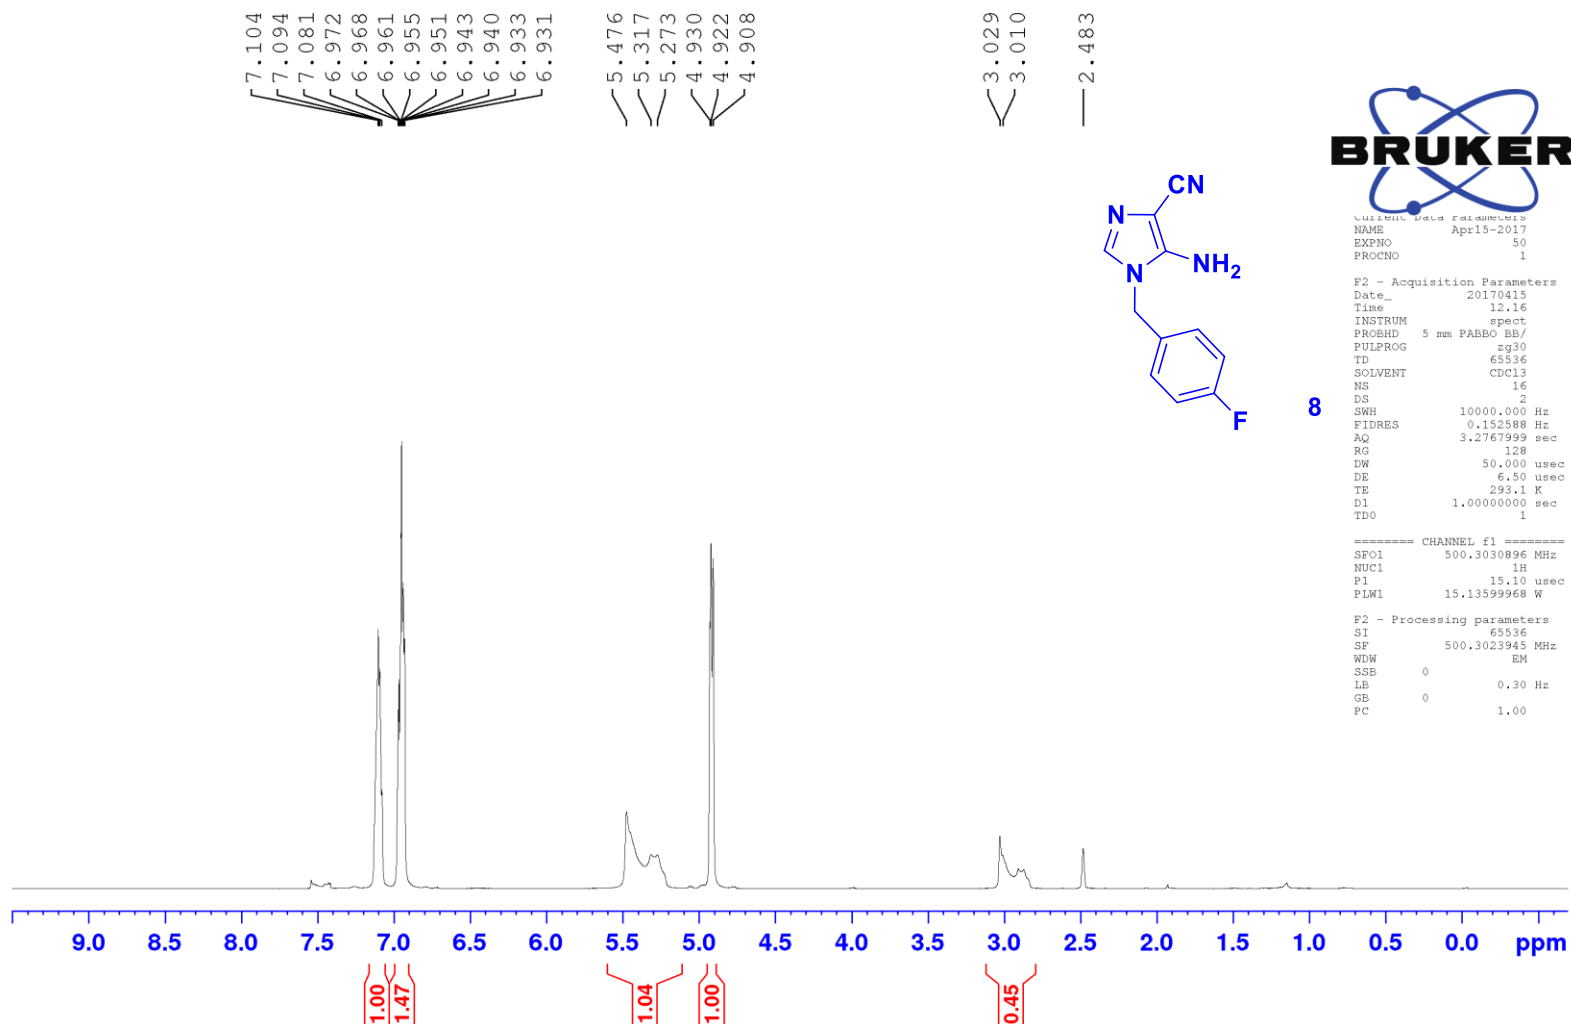

SRK-2 CRYSTALLIZED

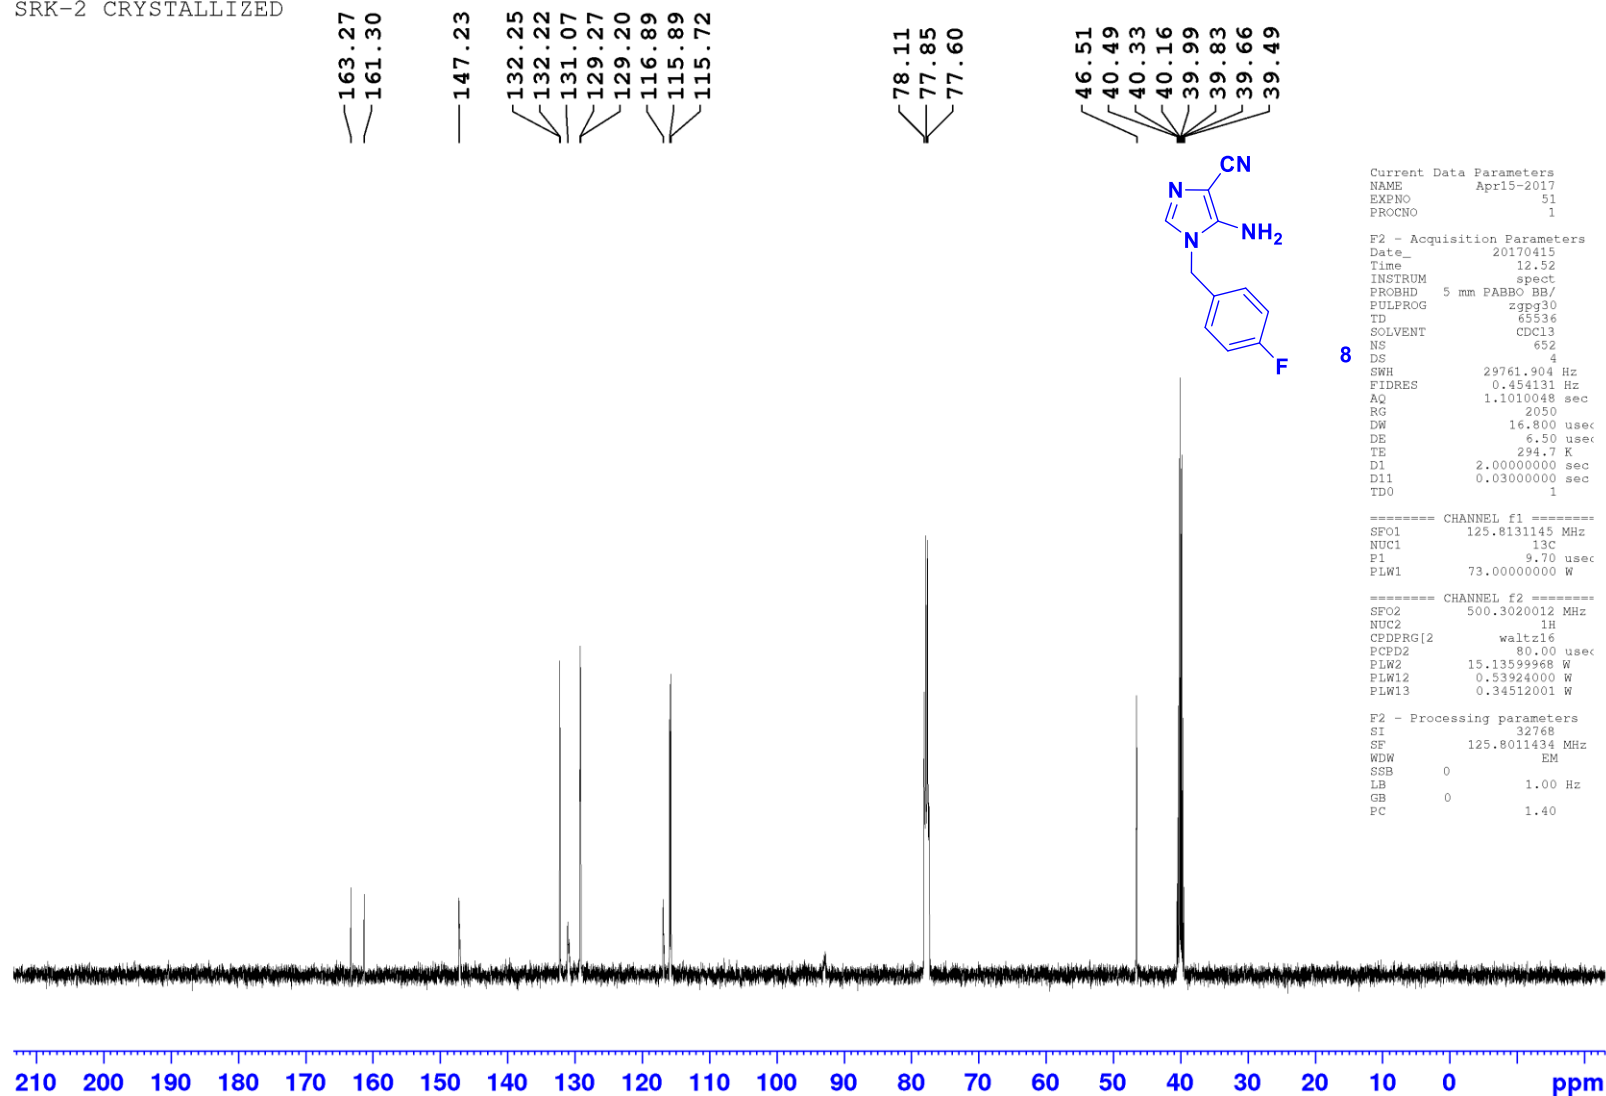

# Spectrum

Line#:1 R.Time:6.290(Scan#:959)

MassPeaks:642

RawMode:Averaged 6.285-6.295(958-960) BasePeak:109(7591332)

BG Mode:Calc. from Peak Group 1 - Event 1

intensity

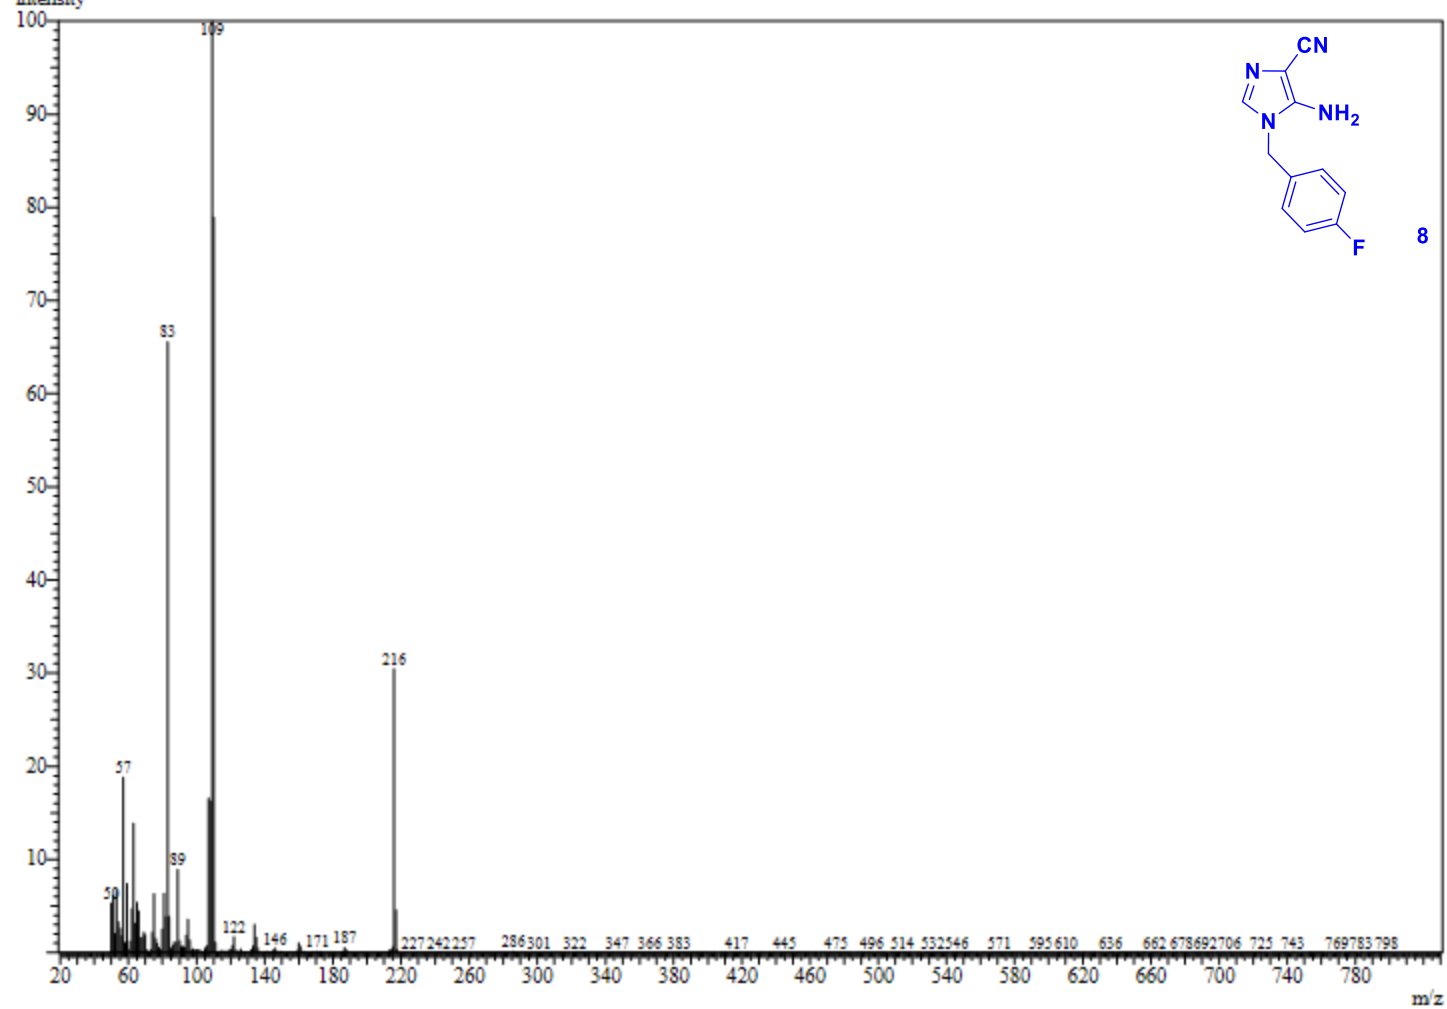

SA-1

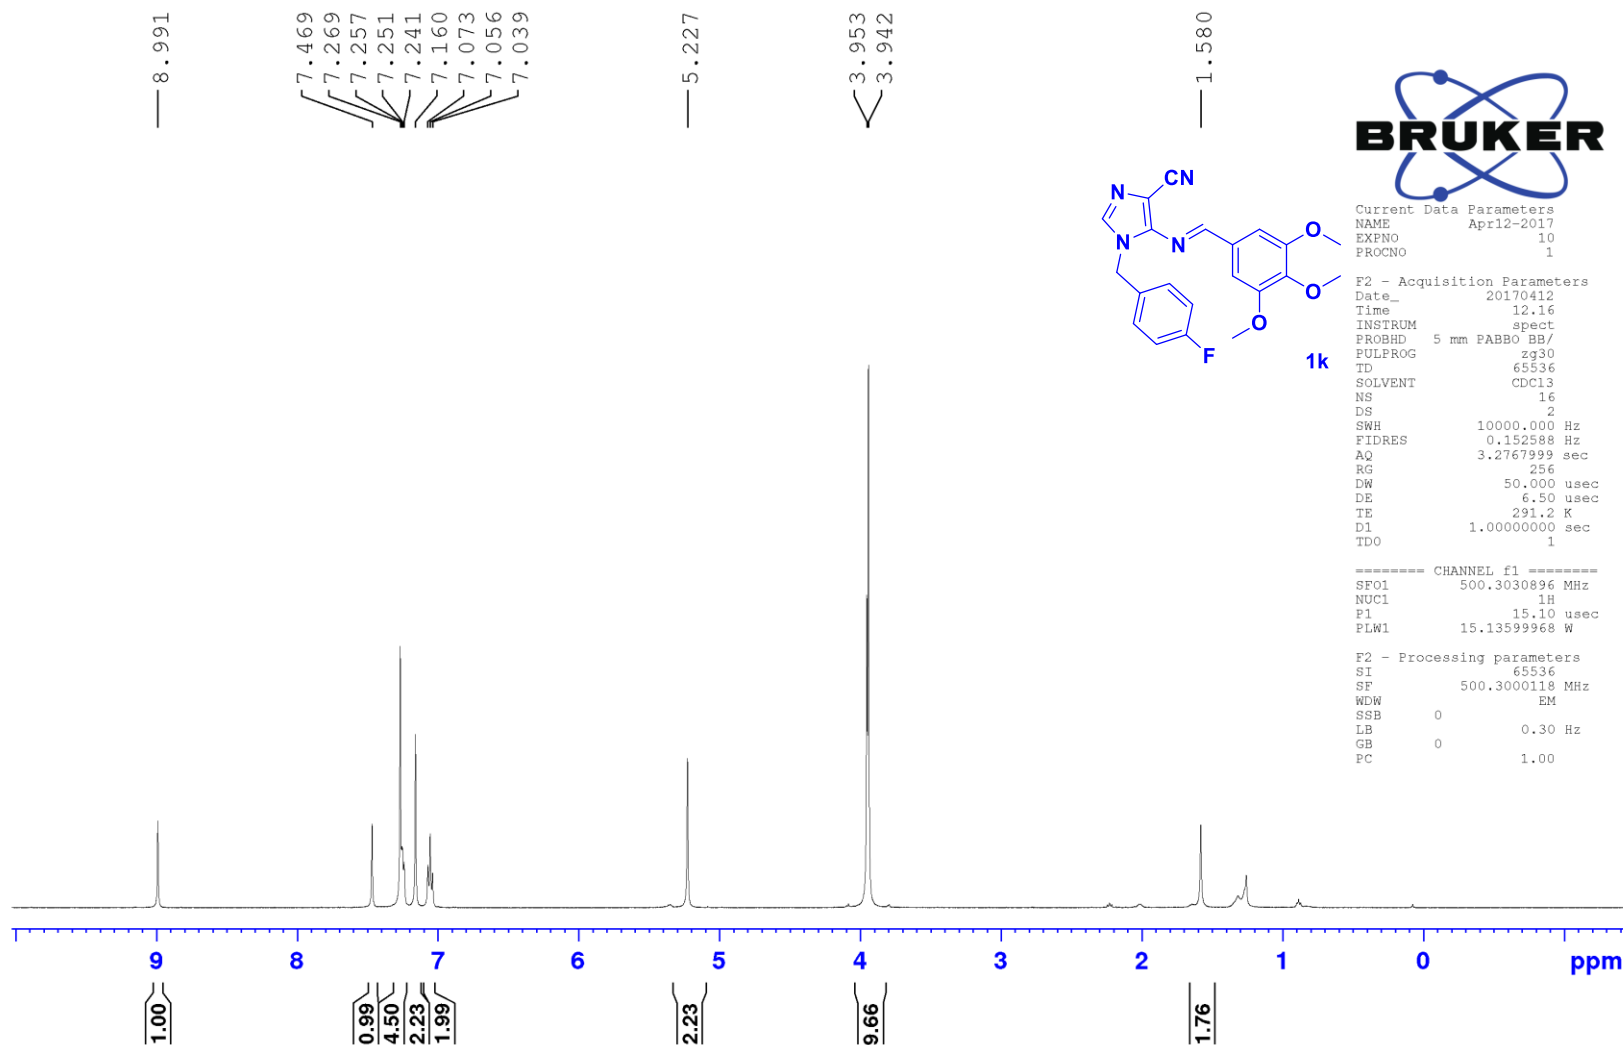

Line#:2 R.Time:6.590(Scan#:1019)

MassPeaks:567

RawMode:Averaged 6.585-6.595(1018-1020) BasePeak:109(2294380)

BG Mode:Calc. from Peak Group 1 - Event 1

intensity

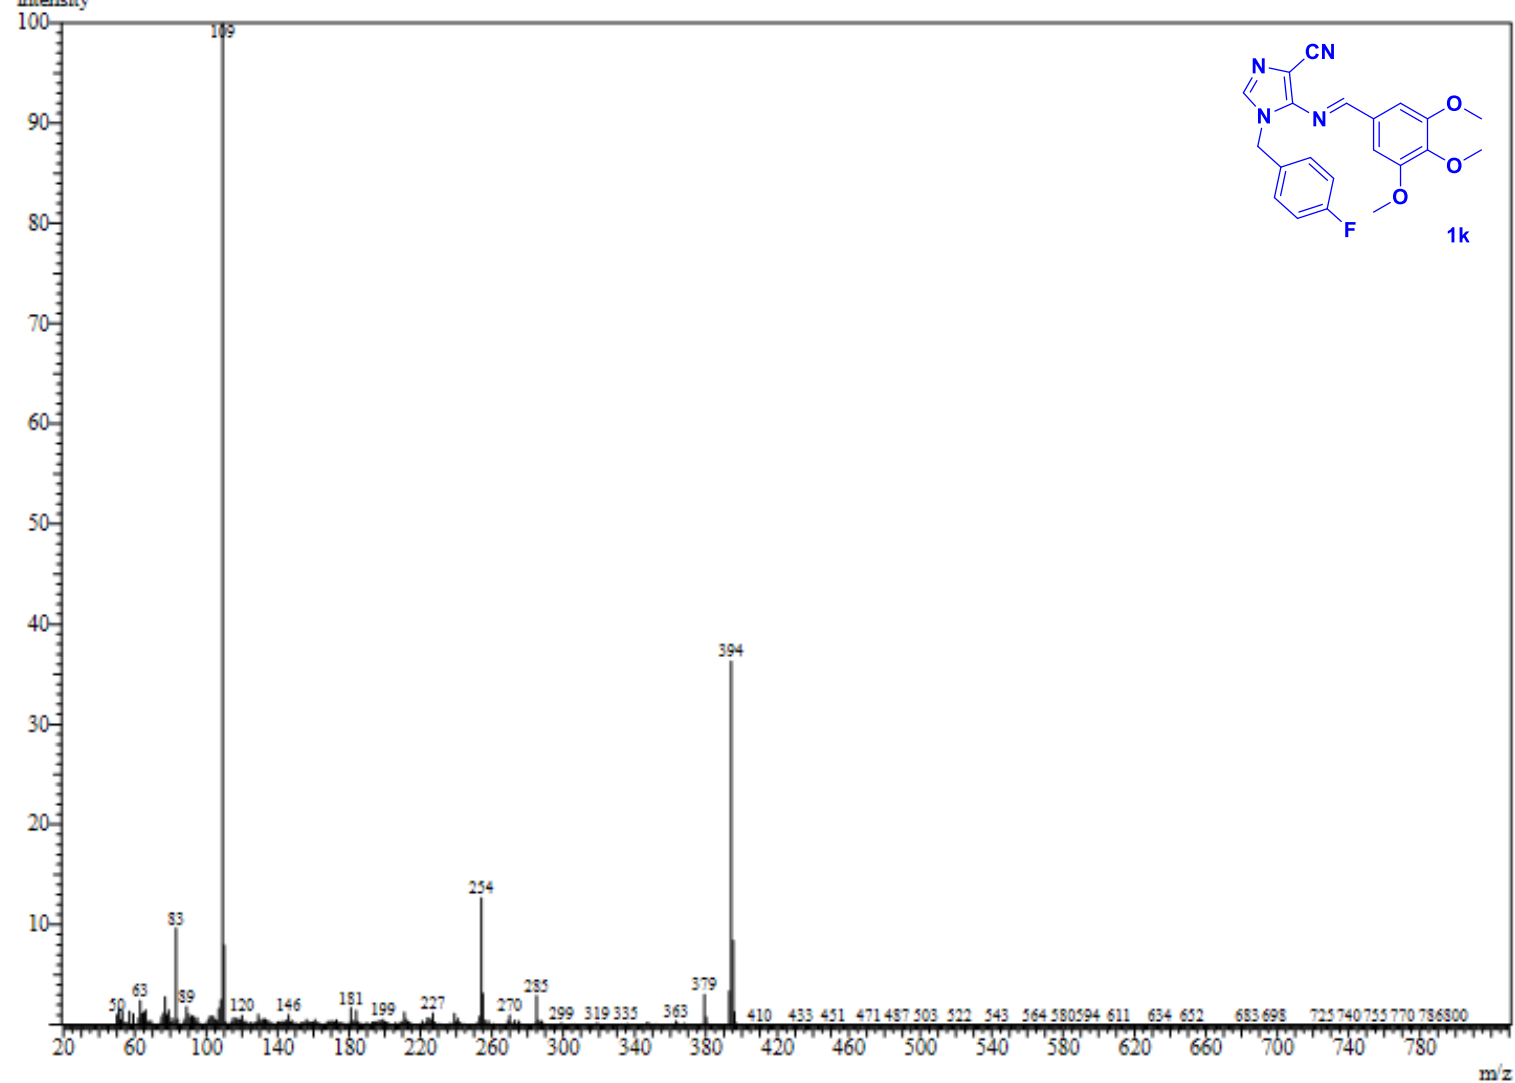

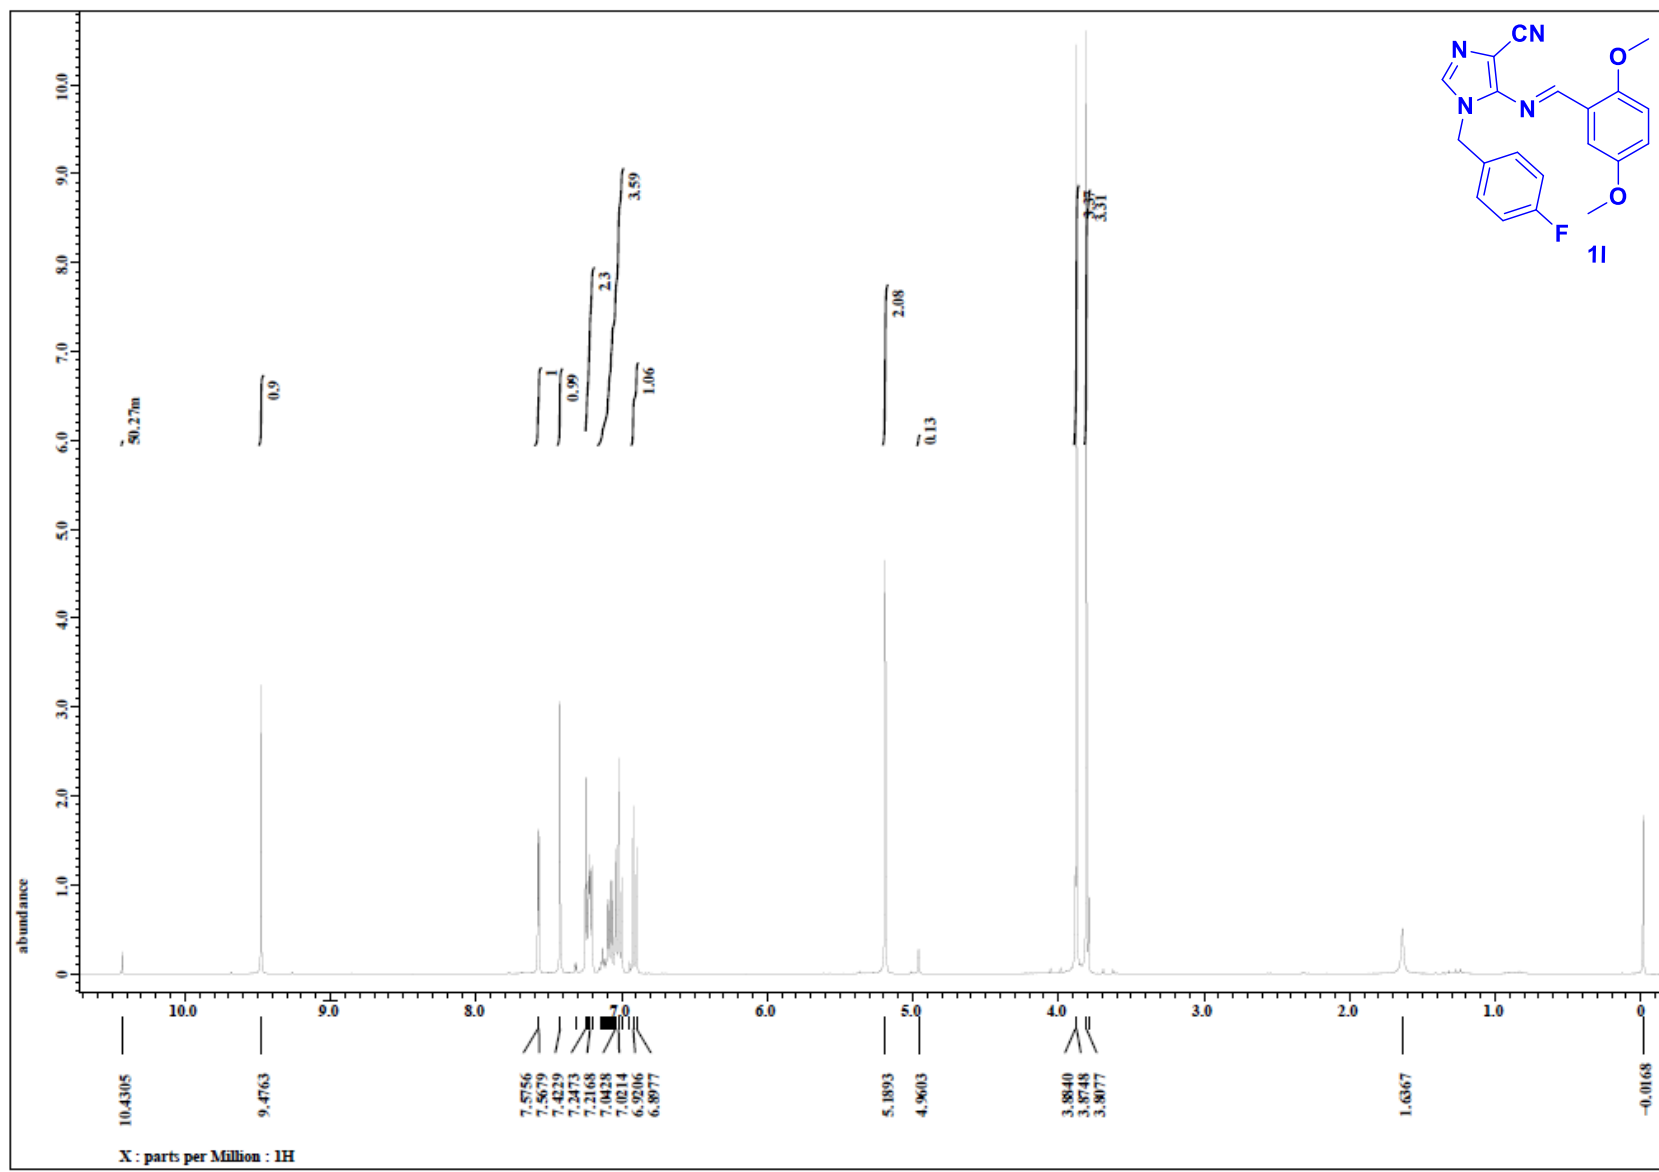

## Elemental Composition Report

Page 1

### Single Mass Analysis

Tolerance = 10.0 PPM / DBE: min = -1.5, max = 50.0

Element prediction: Off

Number of isotope peaks used for i-FIT = 5

Monoisotopic Mass, Even Electron Ions

43 formula(e) evaluated with 1 results within limits (up to 50 best isotopic matches for each mass)

Elements Used:

C: 9-22 H: 11-30 N: 0-5 O: 0-3 F: 0-1

Sample Name : SA-2

IITRPR

XEVO G2-XS QTOF

Test Name : HRMS-1

160120-SA-2 12 (0.131)

1: TOF MS ES+

1.44e+008

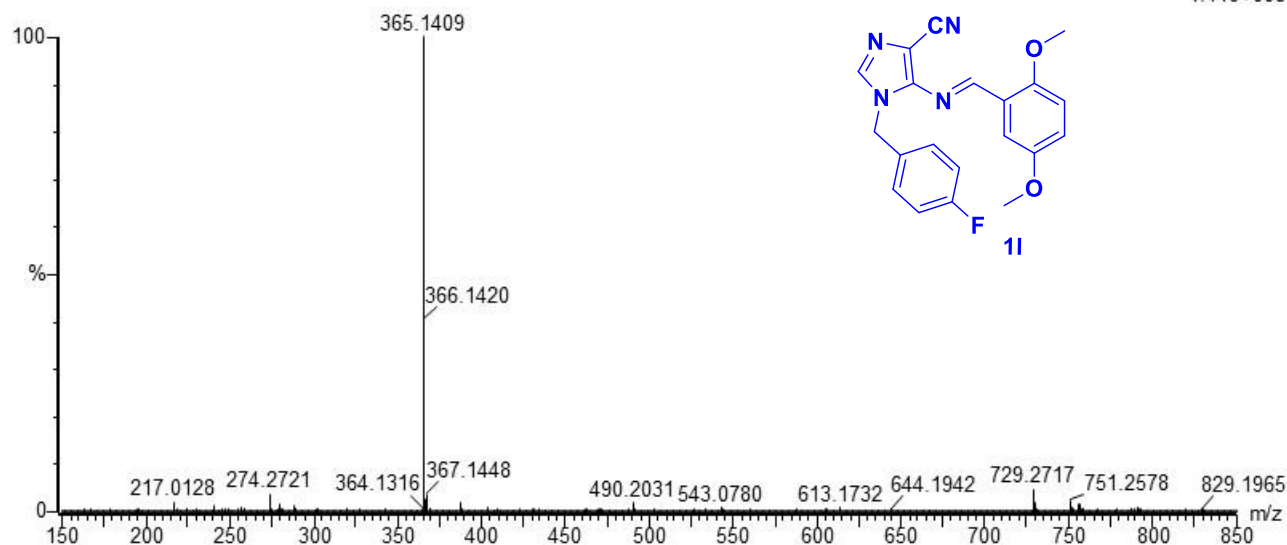

Minimum: -1.5  
Maximum: 5.0 10.0 50.0

| Mass     | Calc. Mass | mDa  | PPM  | DBE  | i-FIT  | Norm | Conf(%) | Formula         |
|----------|------------|------|------|------|--------|------|---------|-----------------|
| 365.1409 | 365.1414   | -0.5 | -1.4 | 13.5 | 1846.9 | n/a  | n/a     | C20 H18 N4 O2 F |

# Spectrum

Line#:1 R.Time:5.230(Scan#:747)

MassPeaks:585

RawMode:Averaged 5.225-5.235(746-748) BasePeak:109(5182759)

BGMode:Calc. from Peak Group 1 - Event 1

intensity

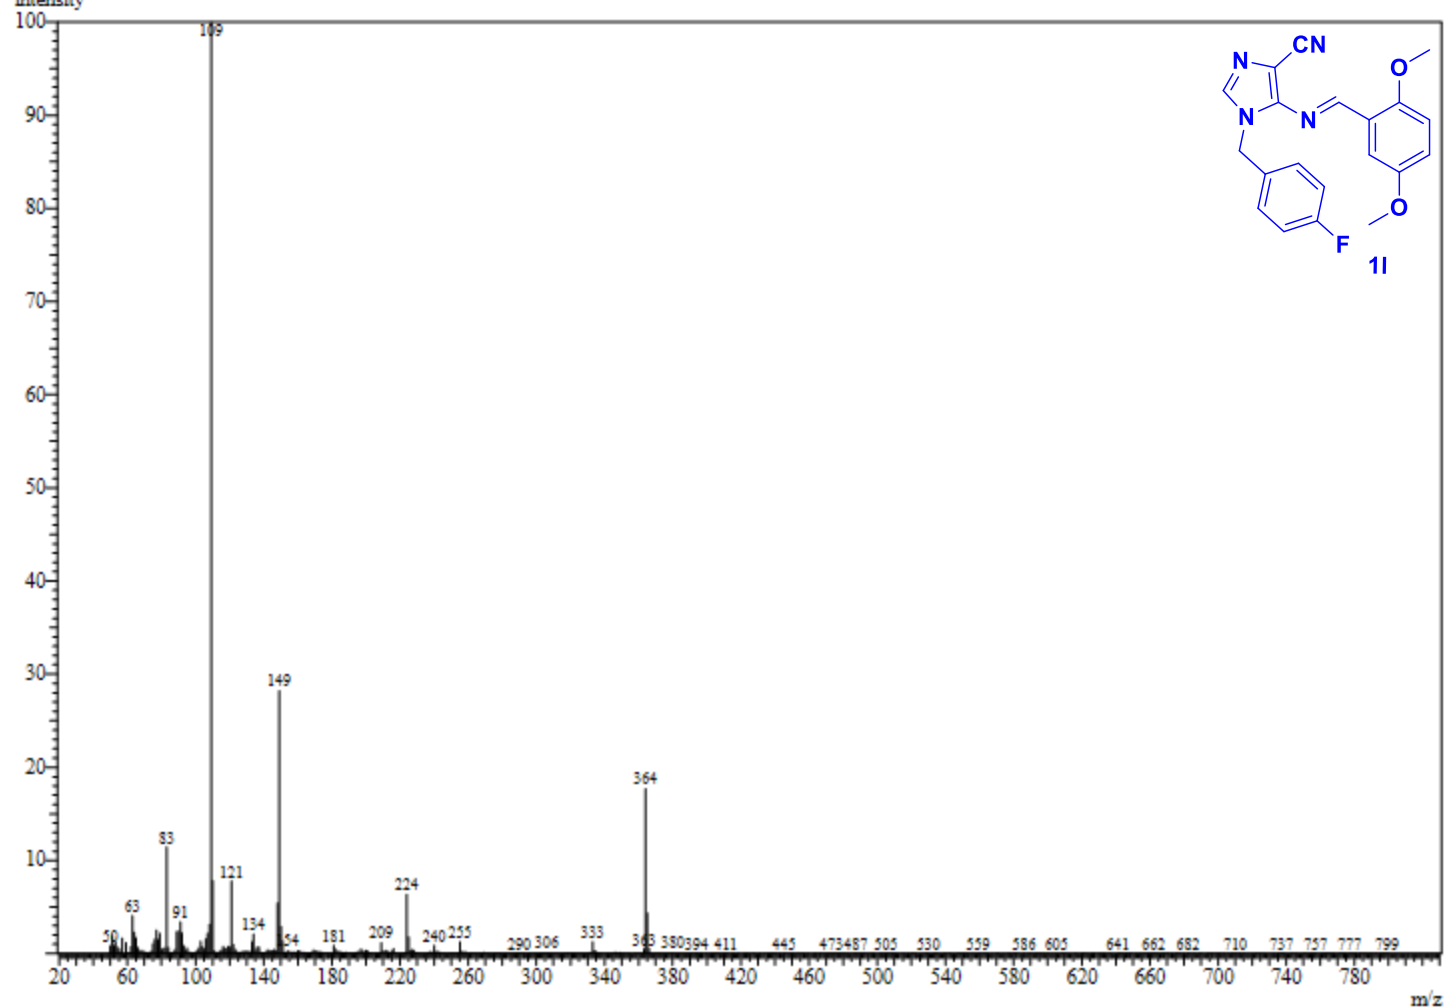

SA-3

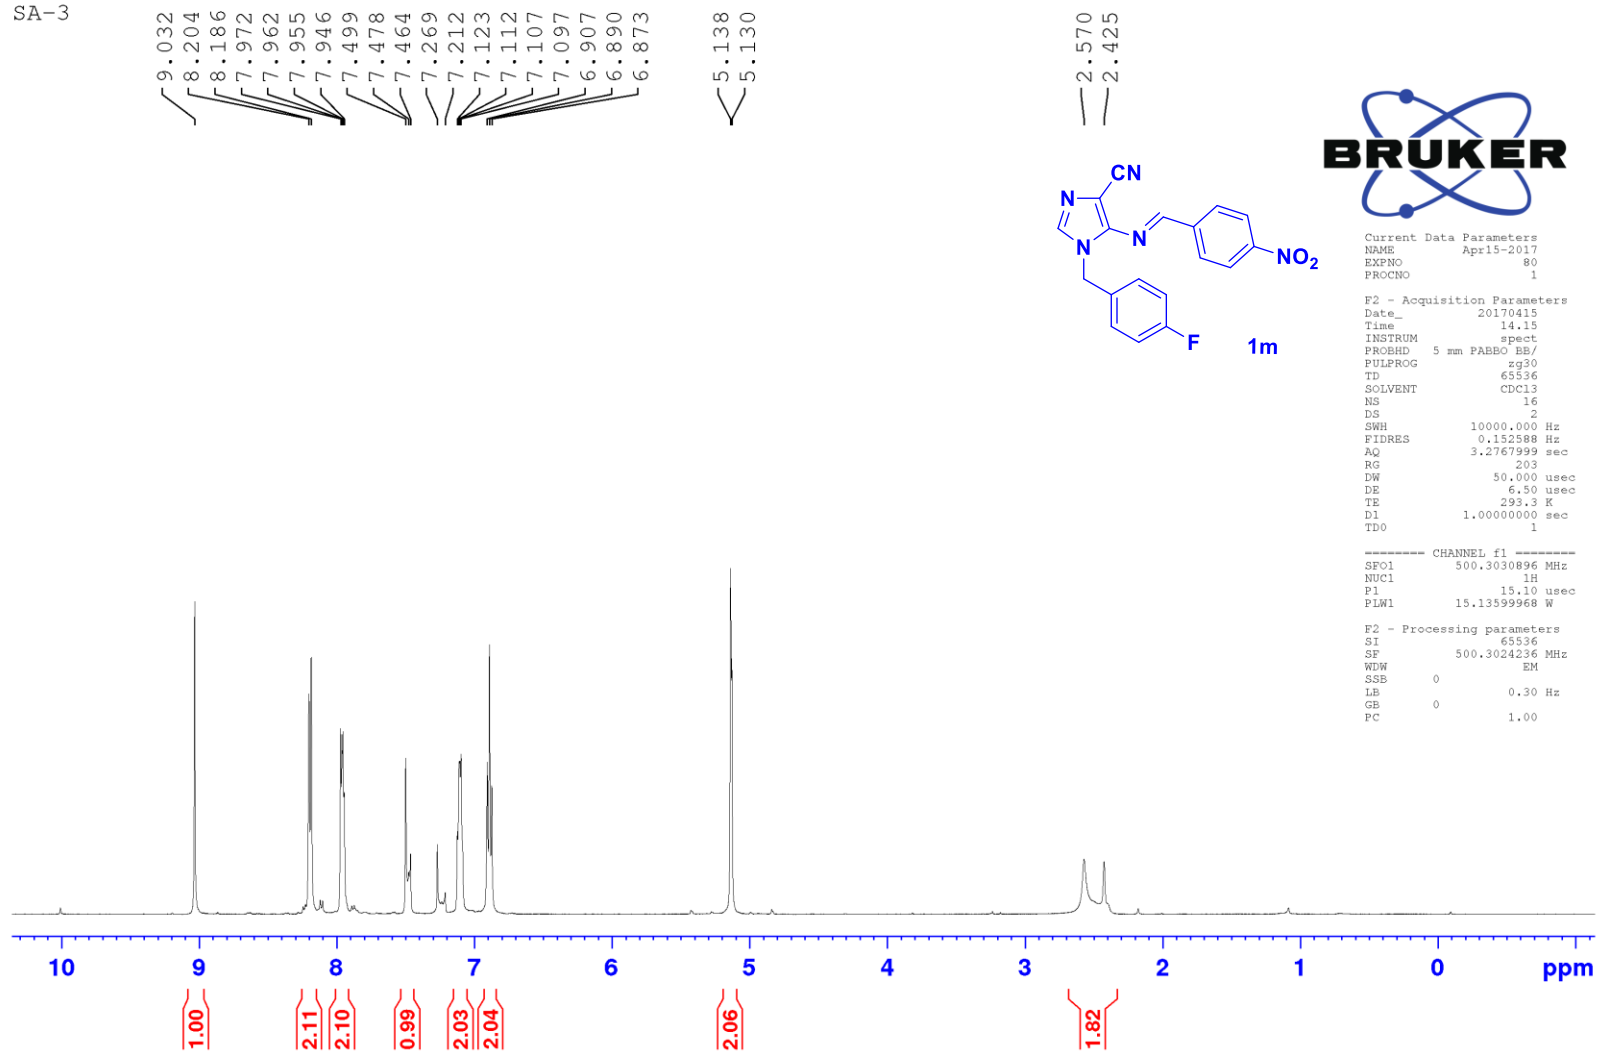

SA-3

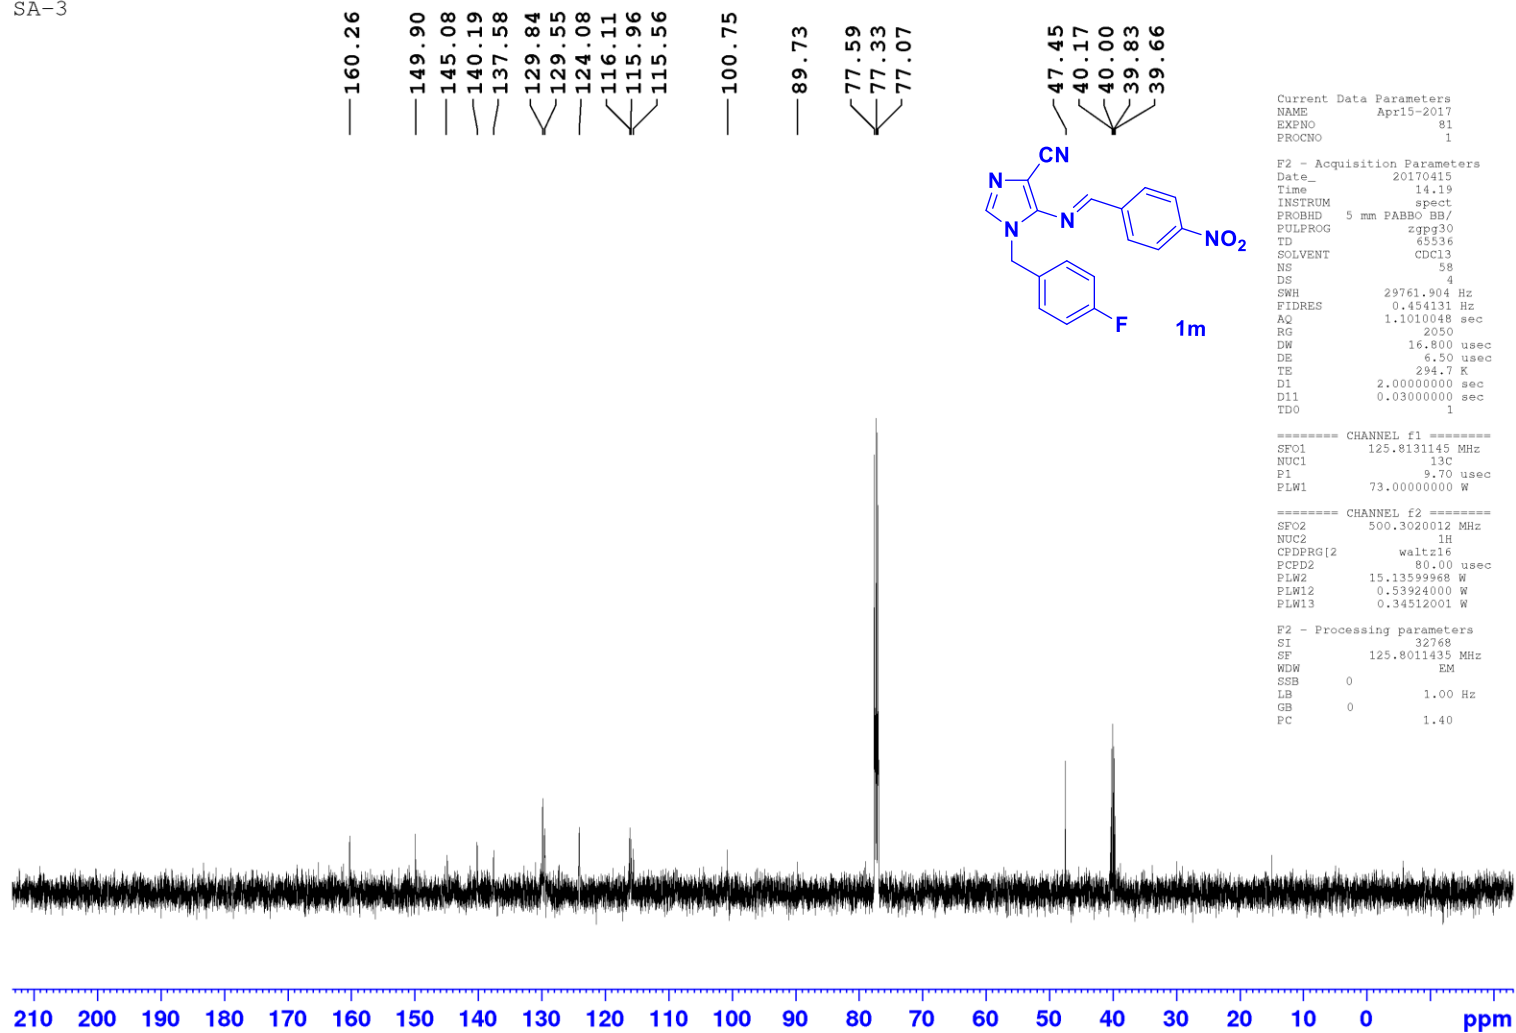

# Spectrum

Line#:1 R.Time:5.910(Scan#:883)

MassPeaks:561

RawMode:Averaged 5.905-5.915(882-884) BasePeak:109(2769141)

BGMode:Calc. from Peak Group 1 - Event 1

intensity

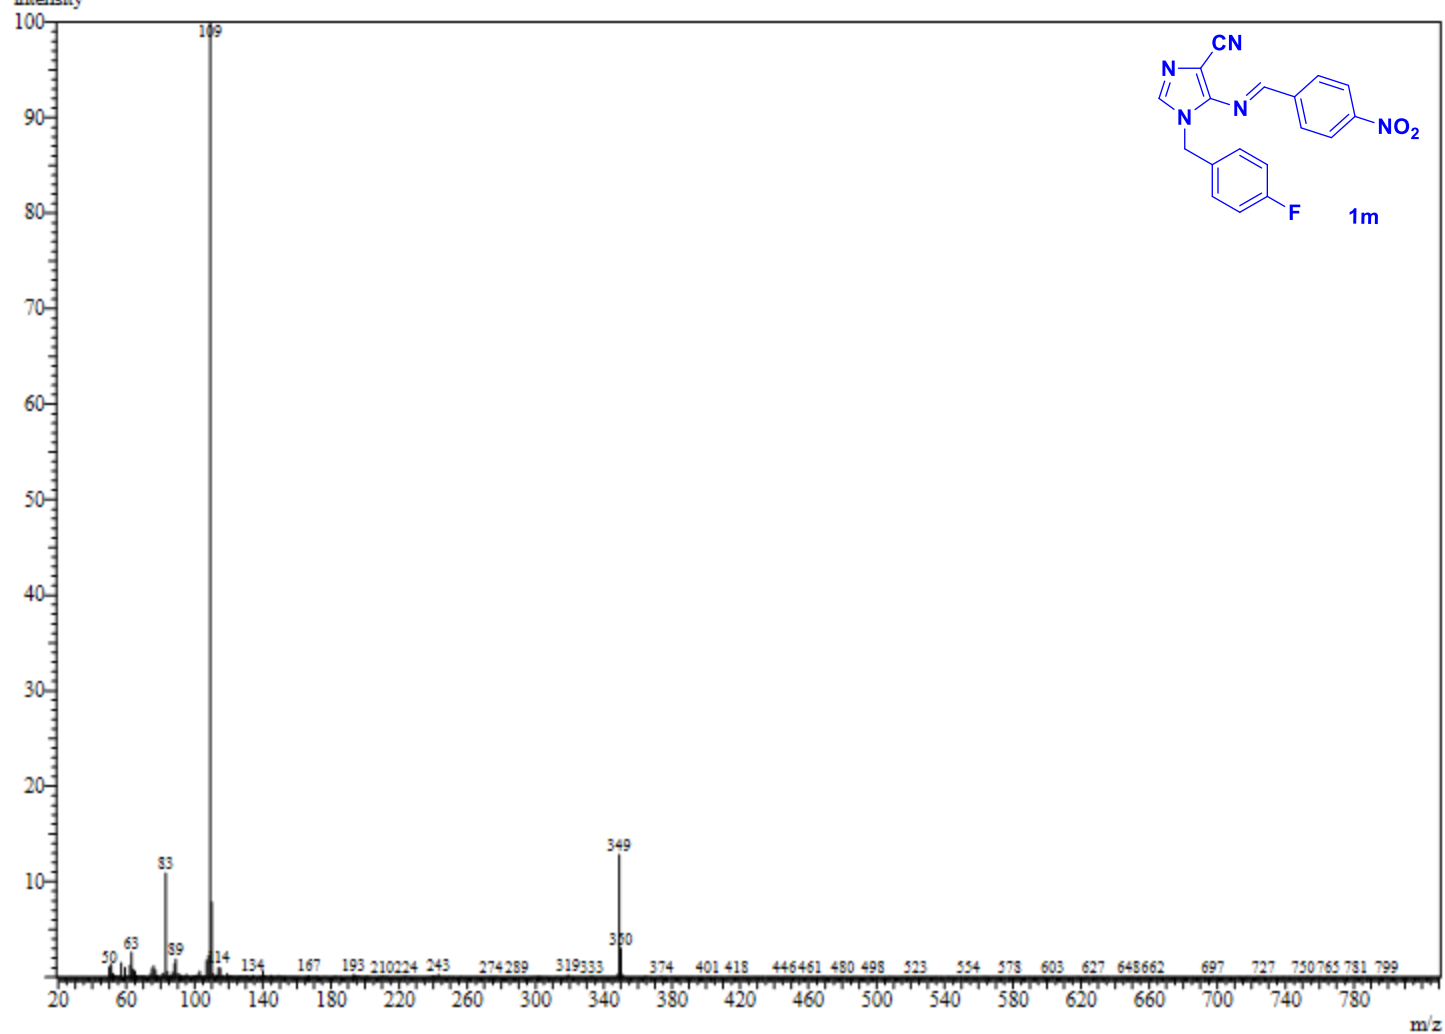

SA-4

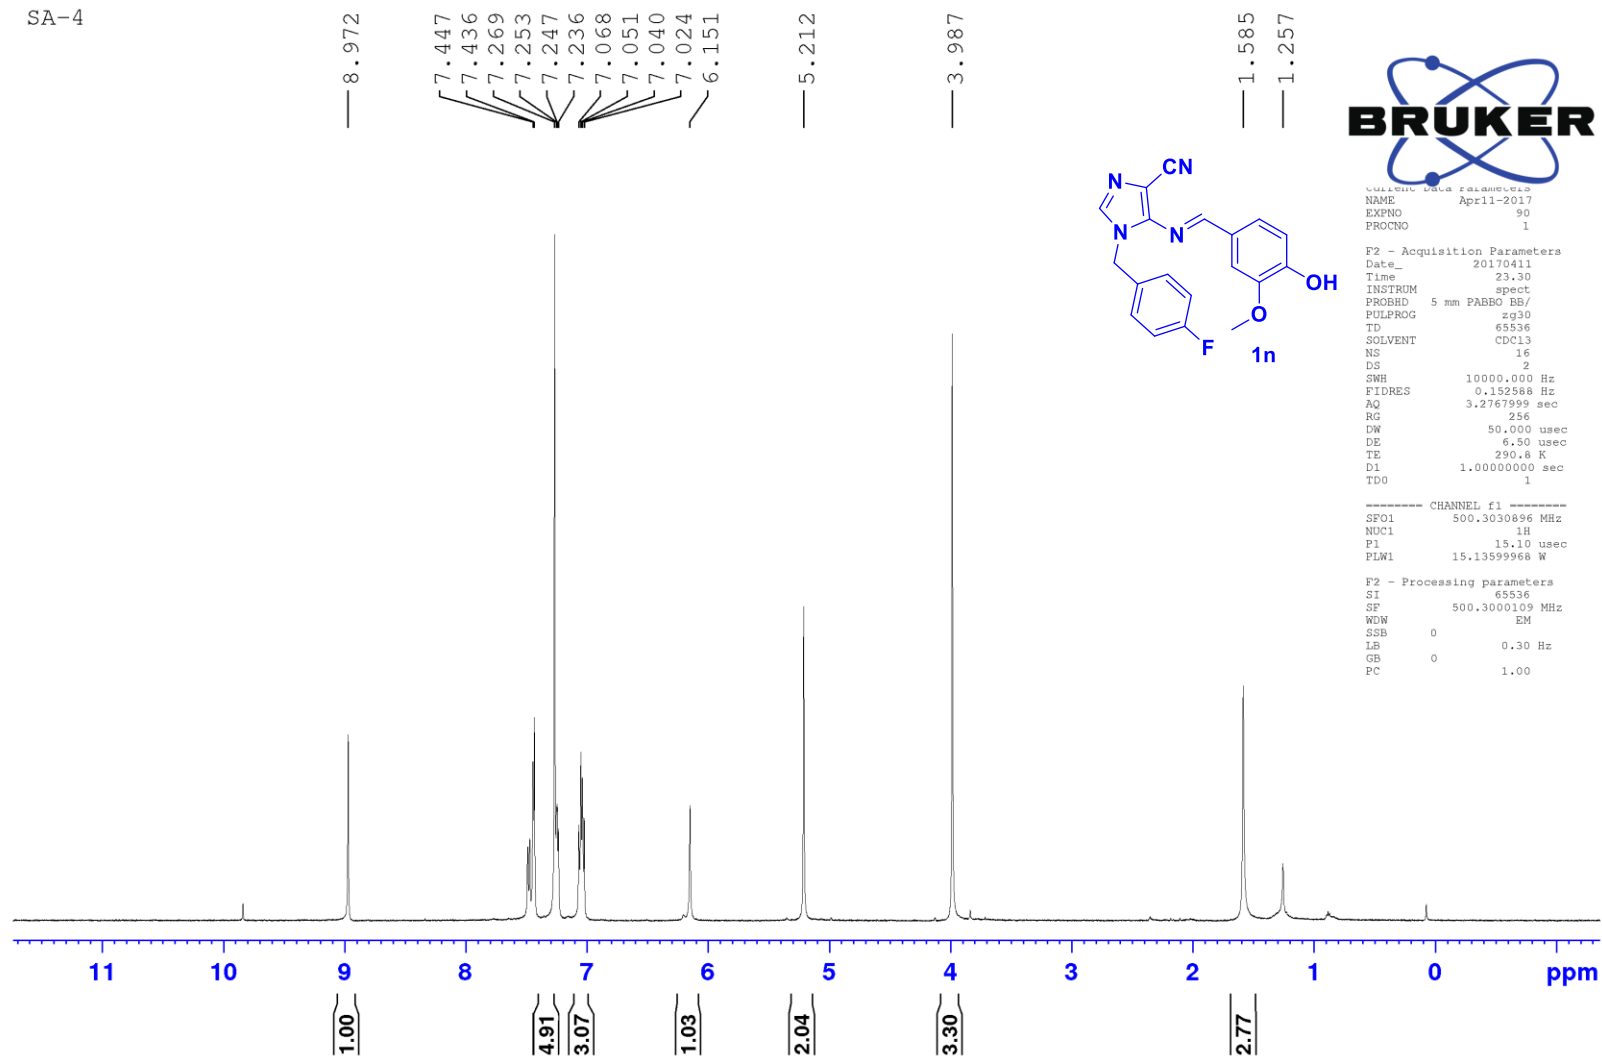

SA-4

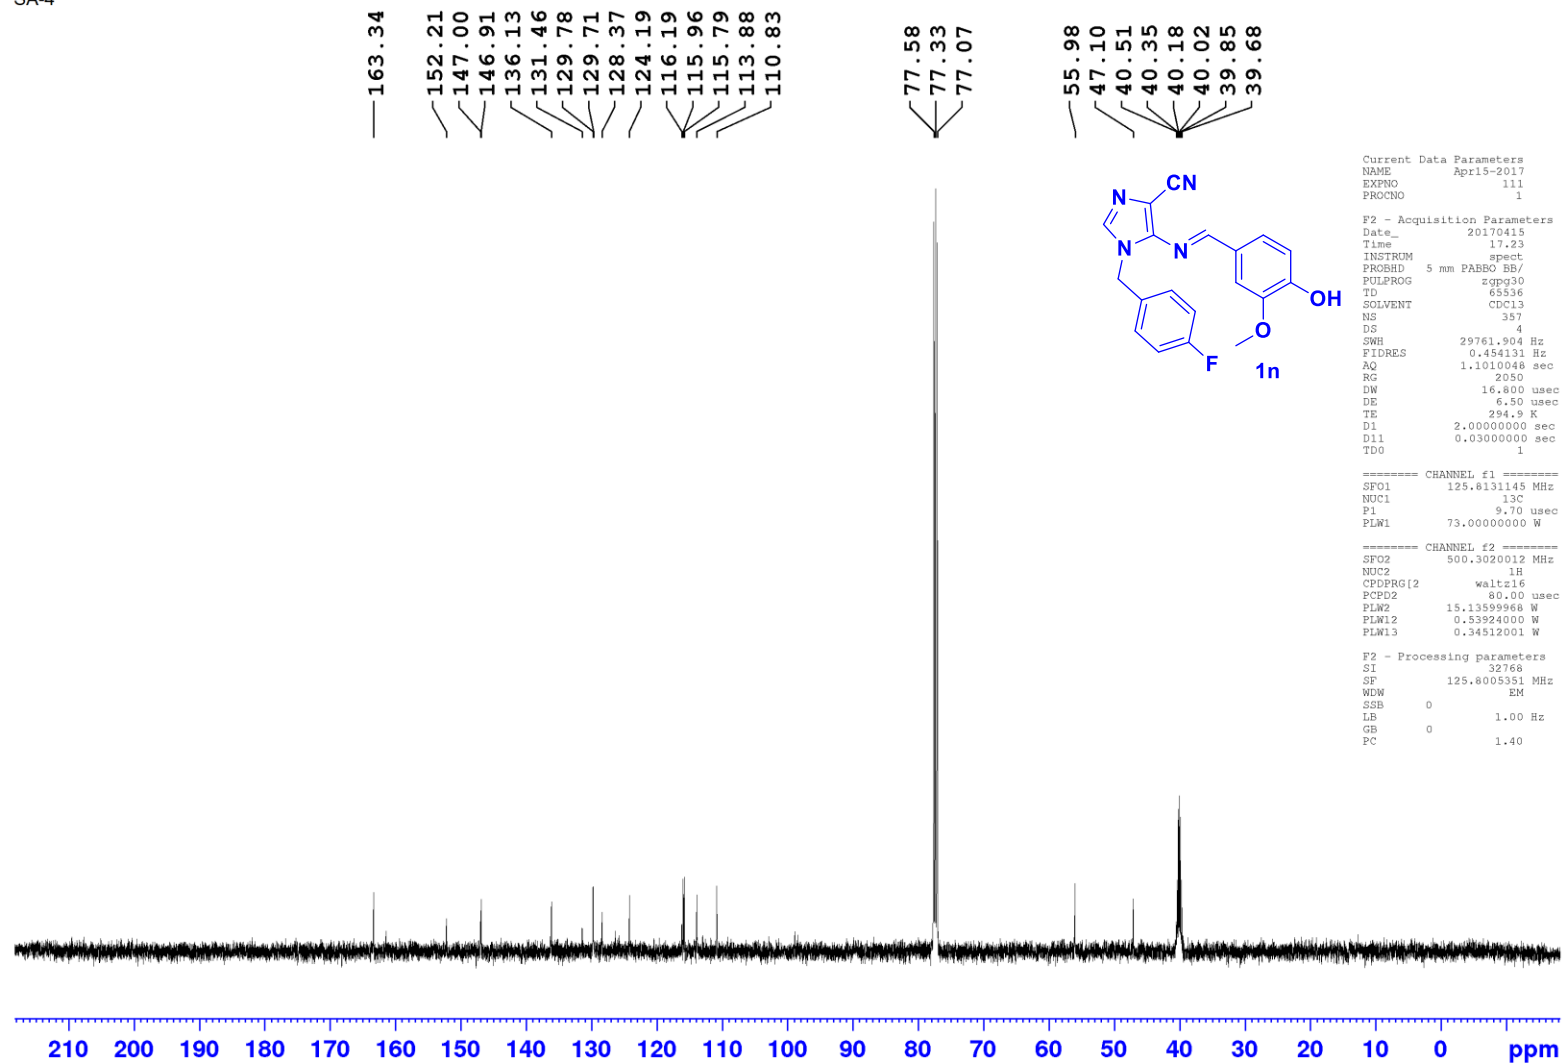

# Spectrum

Line#:1 R.Time:6.445(Scan#:990)

MassPeaks:621

RawMode:Averaged 6.440-6.450(989-991) BasePeak:109(7420310)

BG Mode:Calc. from Peak Group 1 - Event 1

intensity

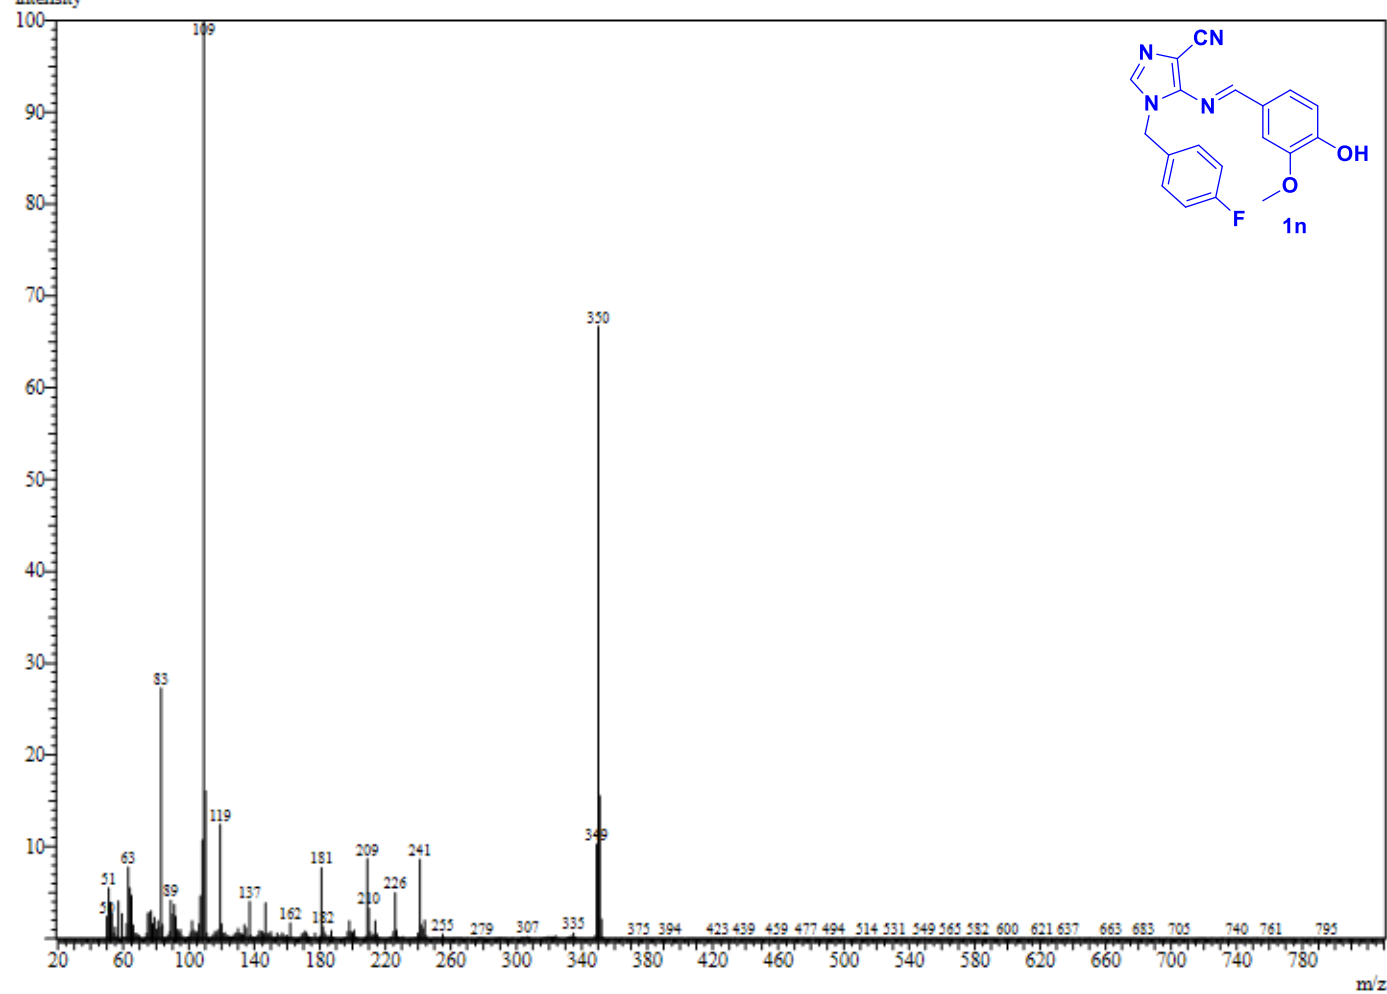

SA-8

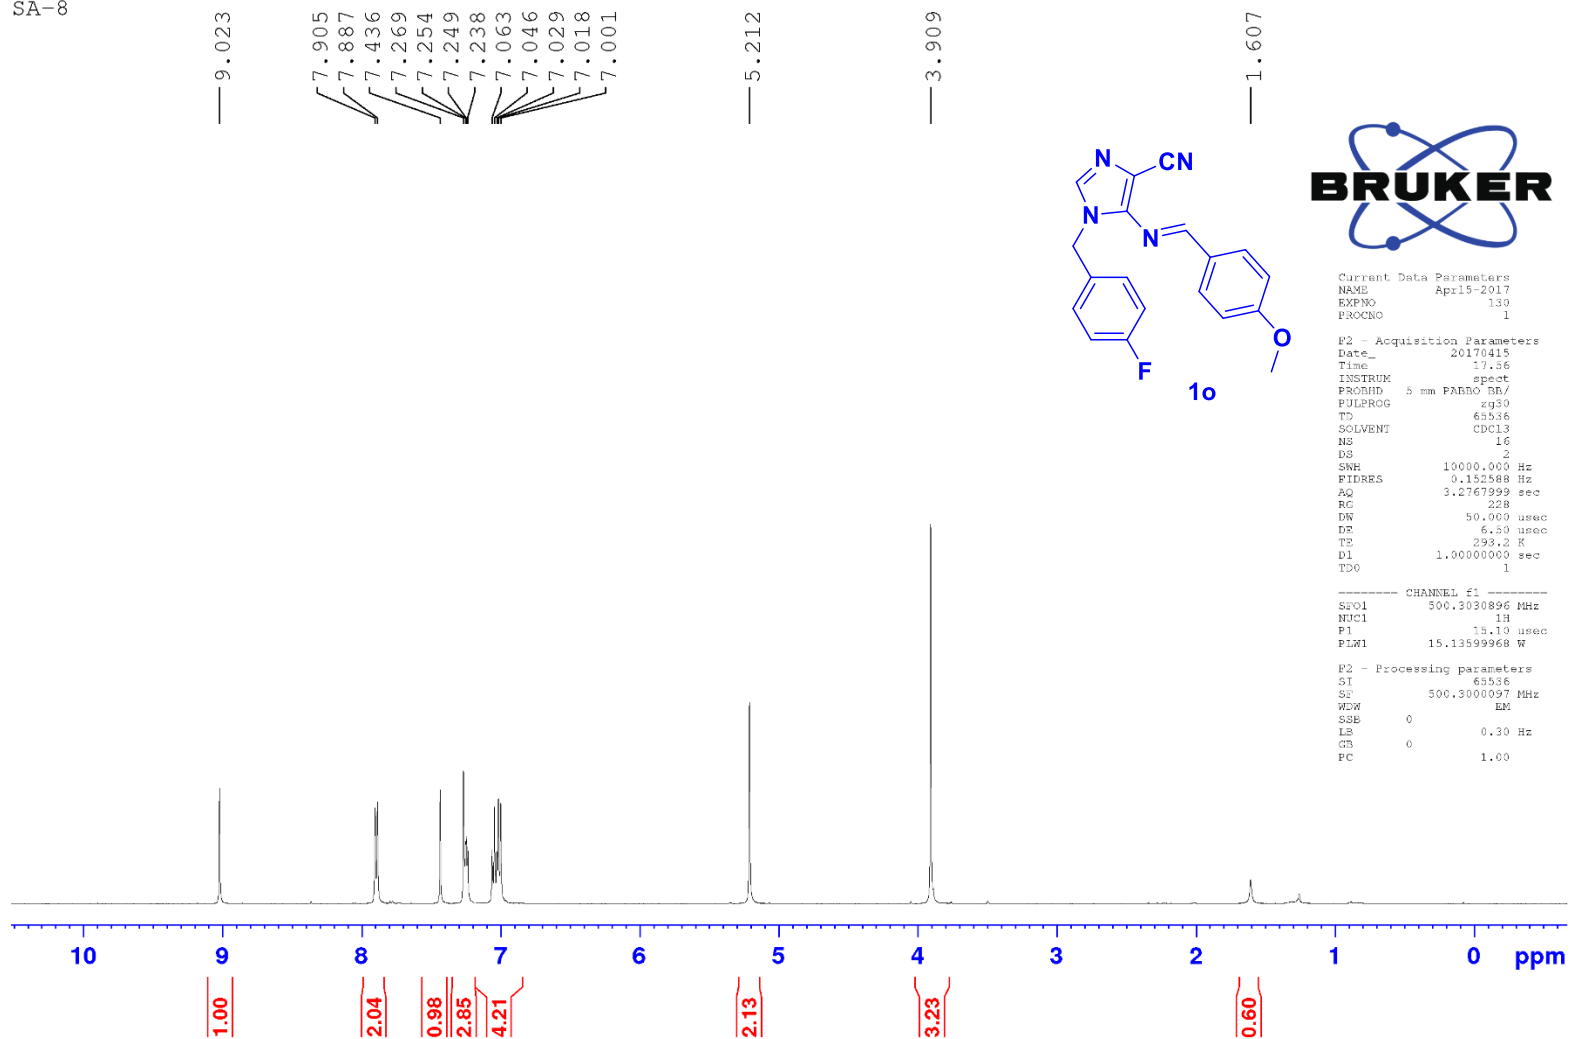

SA-8

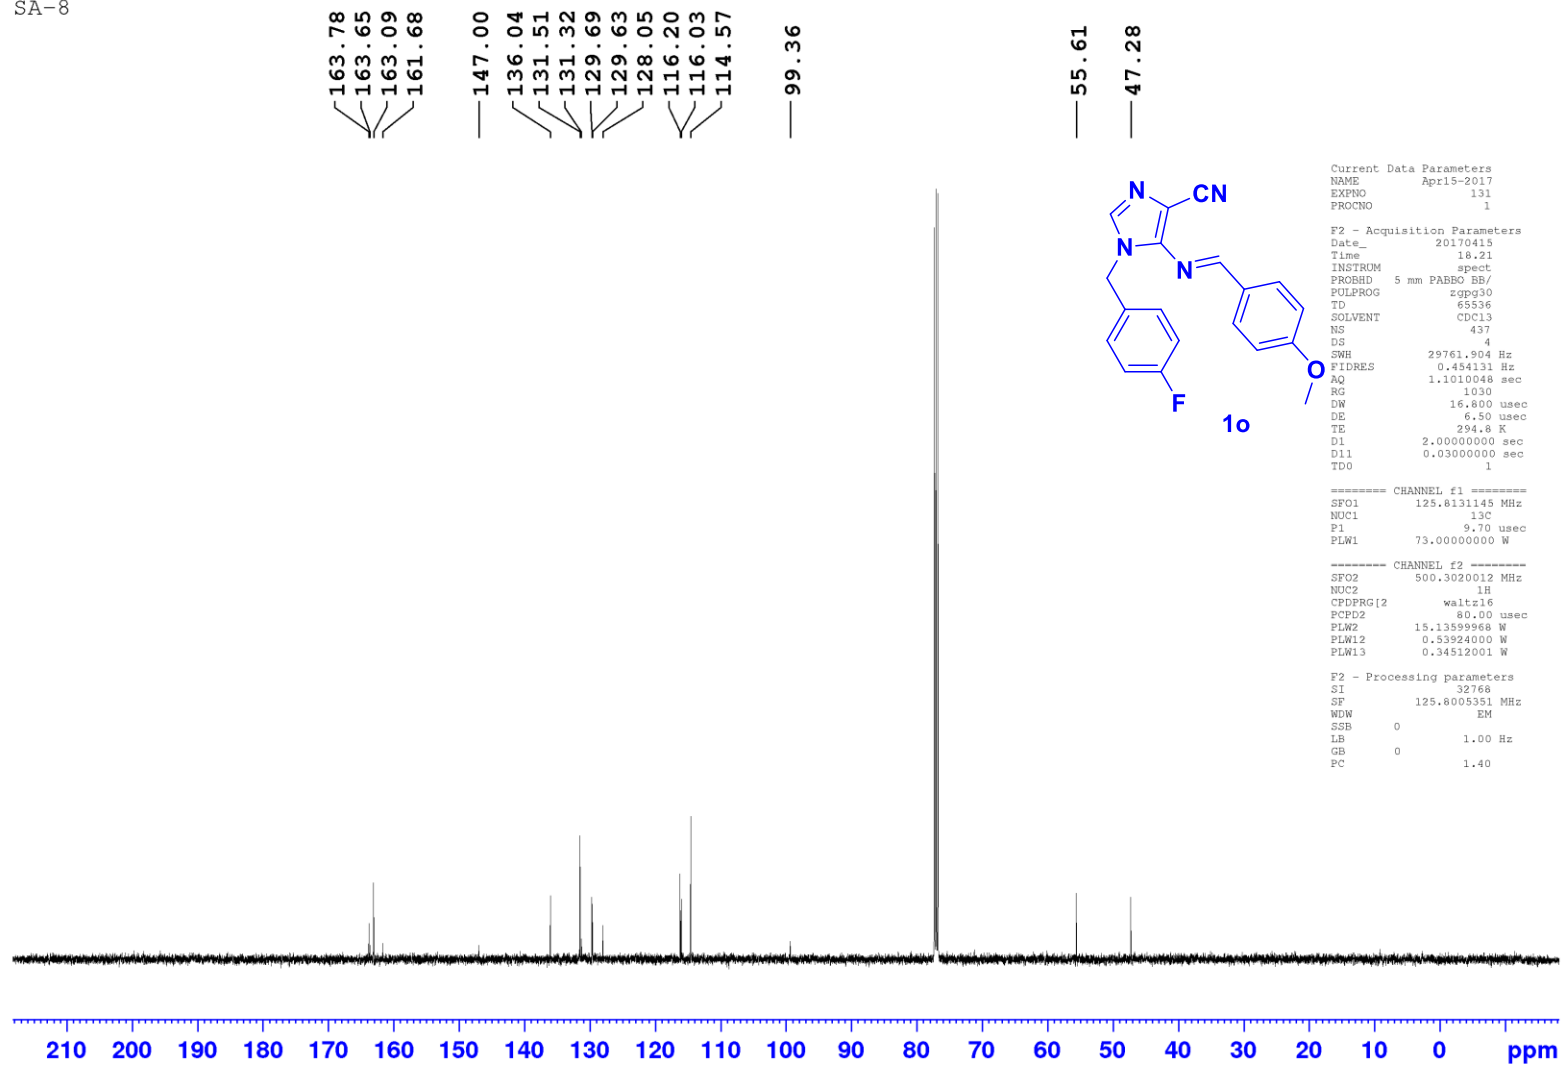

Sample Name : SAP  
Test Name : HRMS-1  
231117-SAP 9 (0.117) AM2 (Ar,15000.0,0.00,0.00); Cm (9:13)

INDIAN INSTITUTE OF TECHNOLOGY  
ROPAR

XEVO G2-XS QTOF

1: TOF MS ES+  
3.65e7

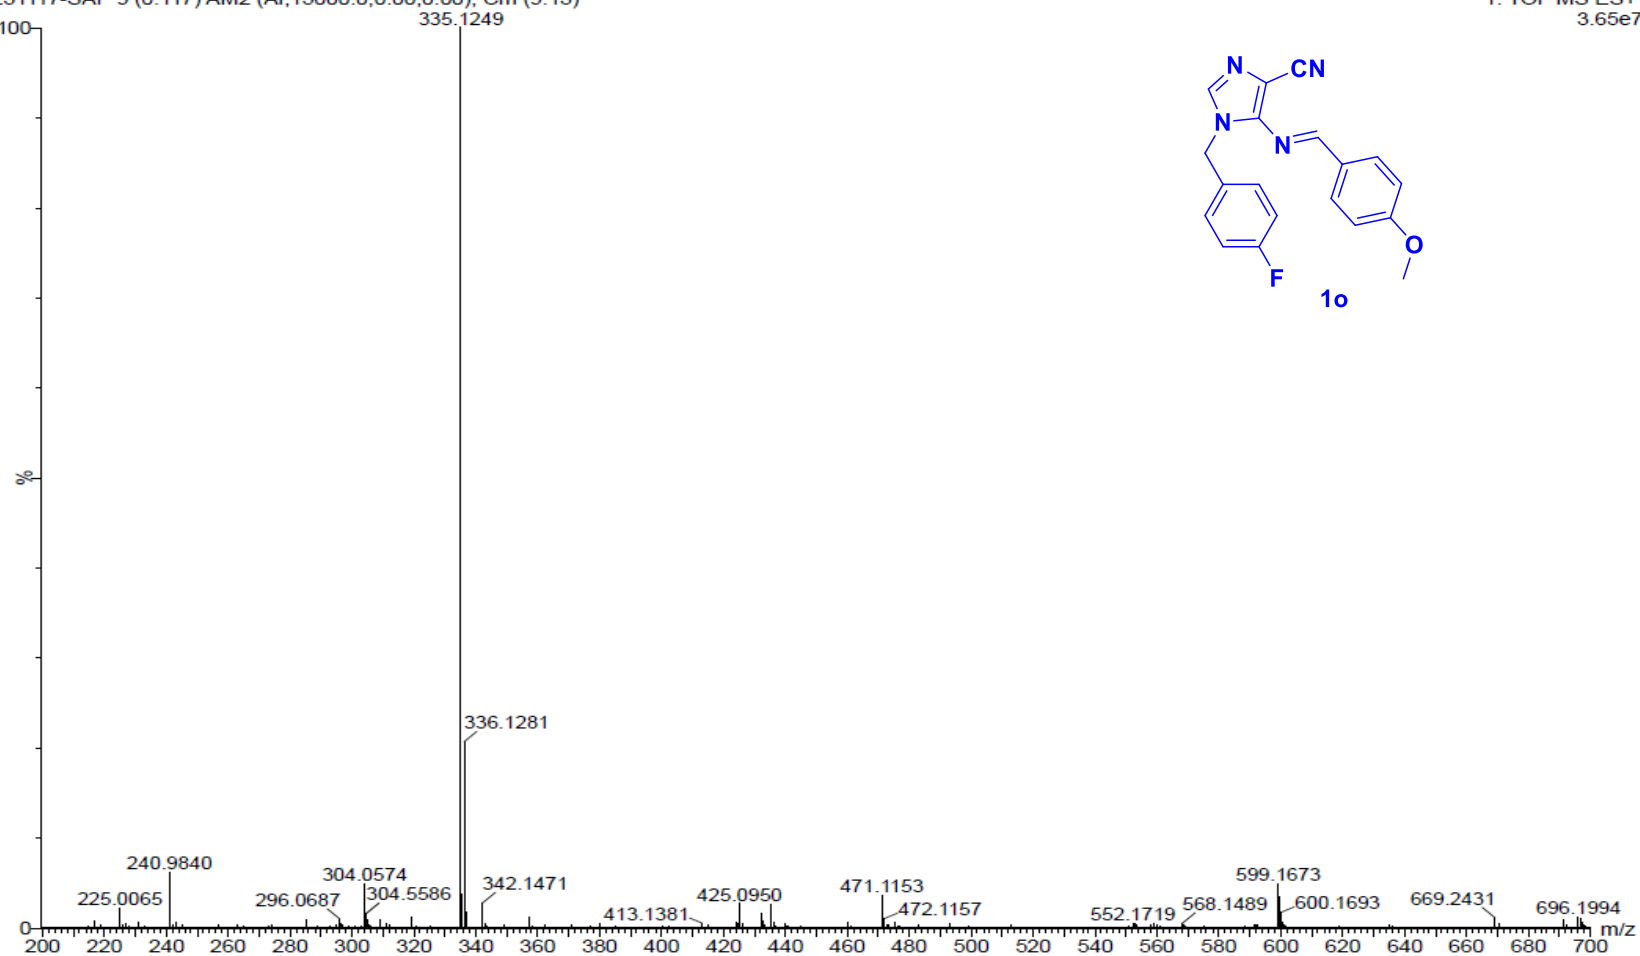

SA-11

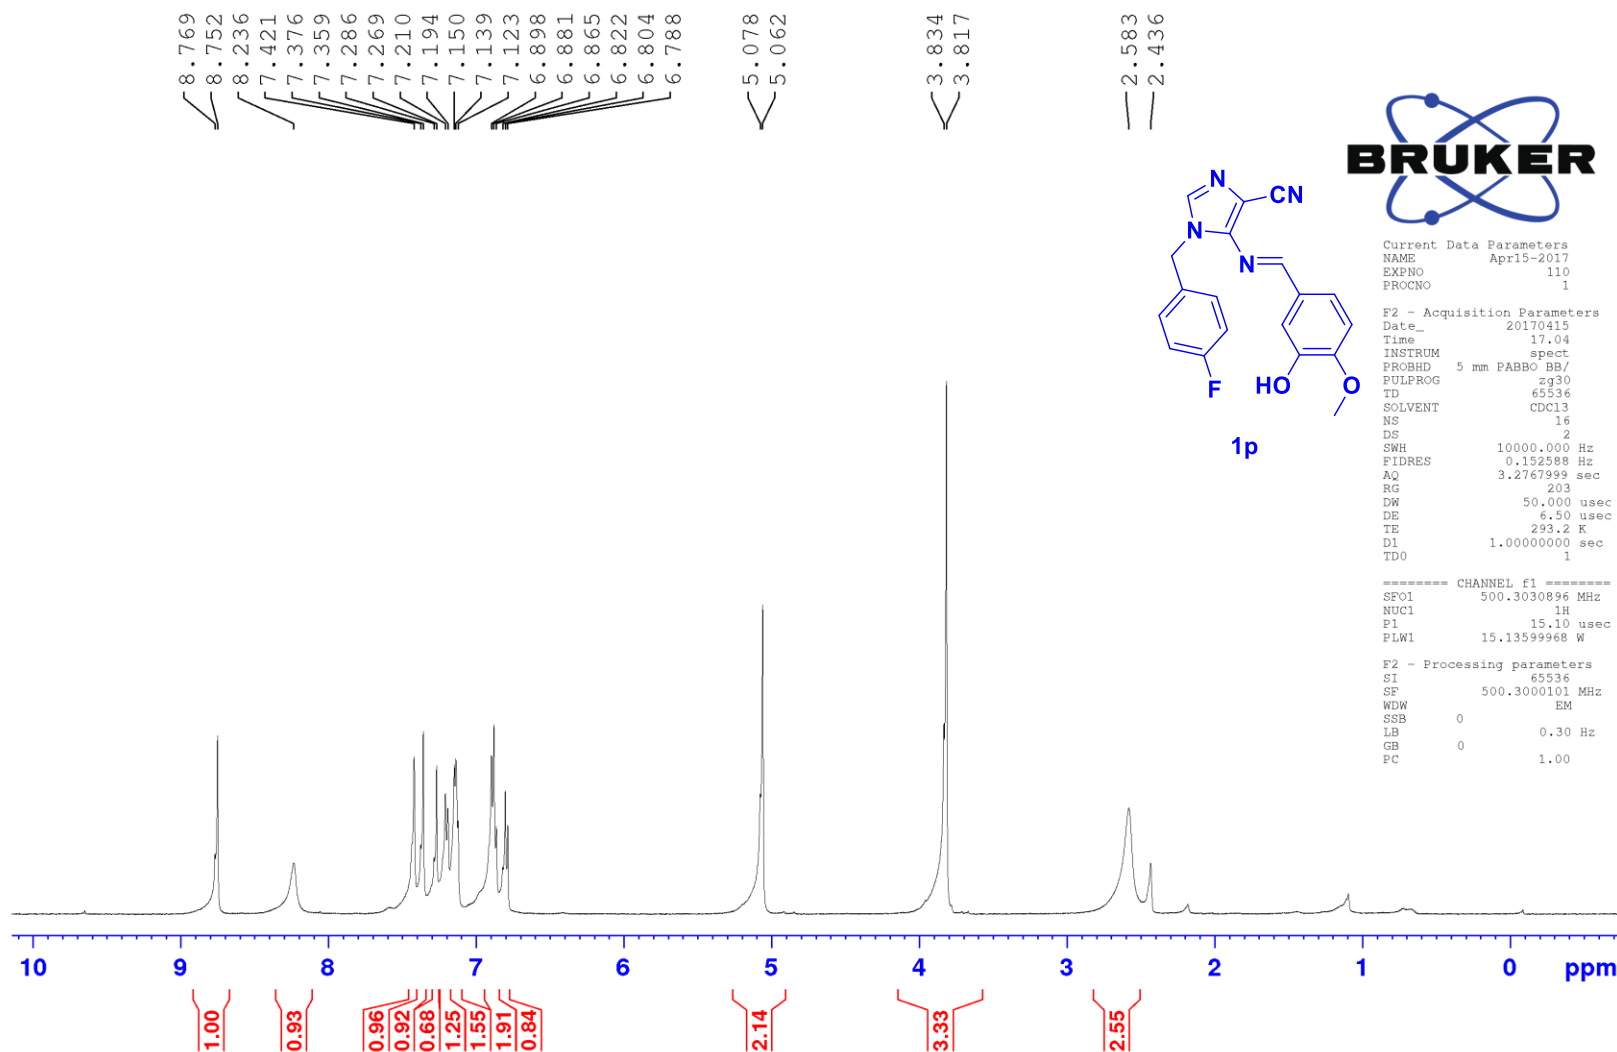

SA-11

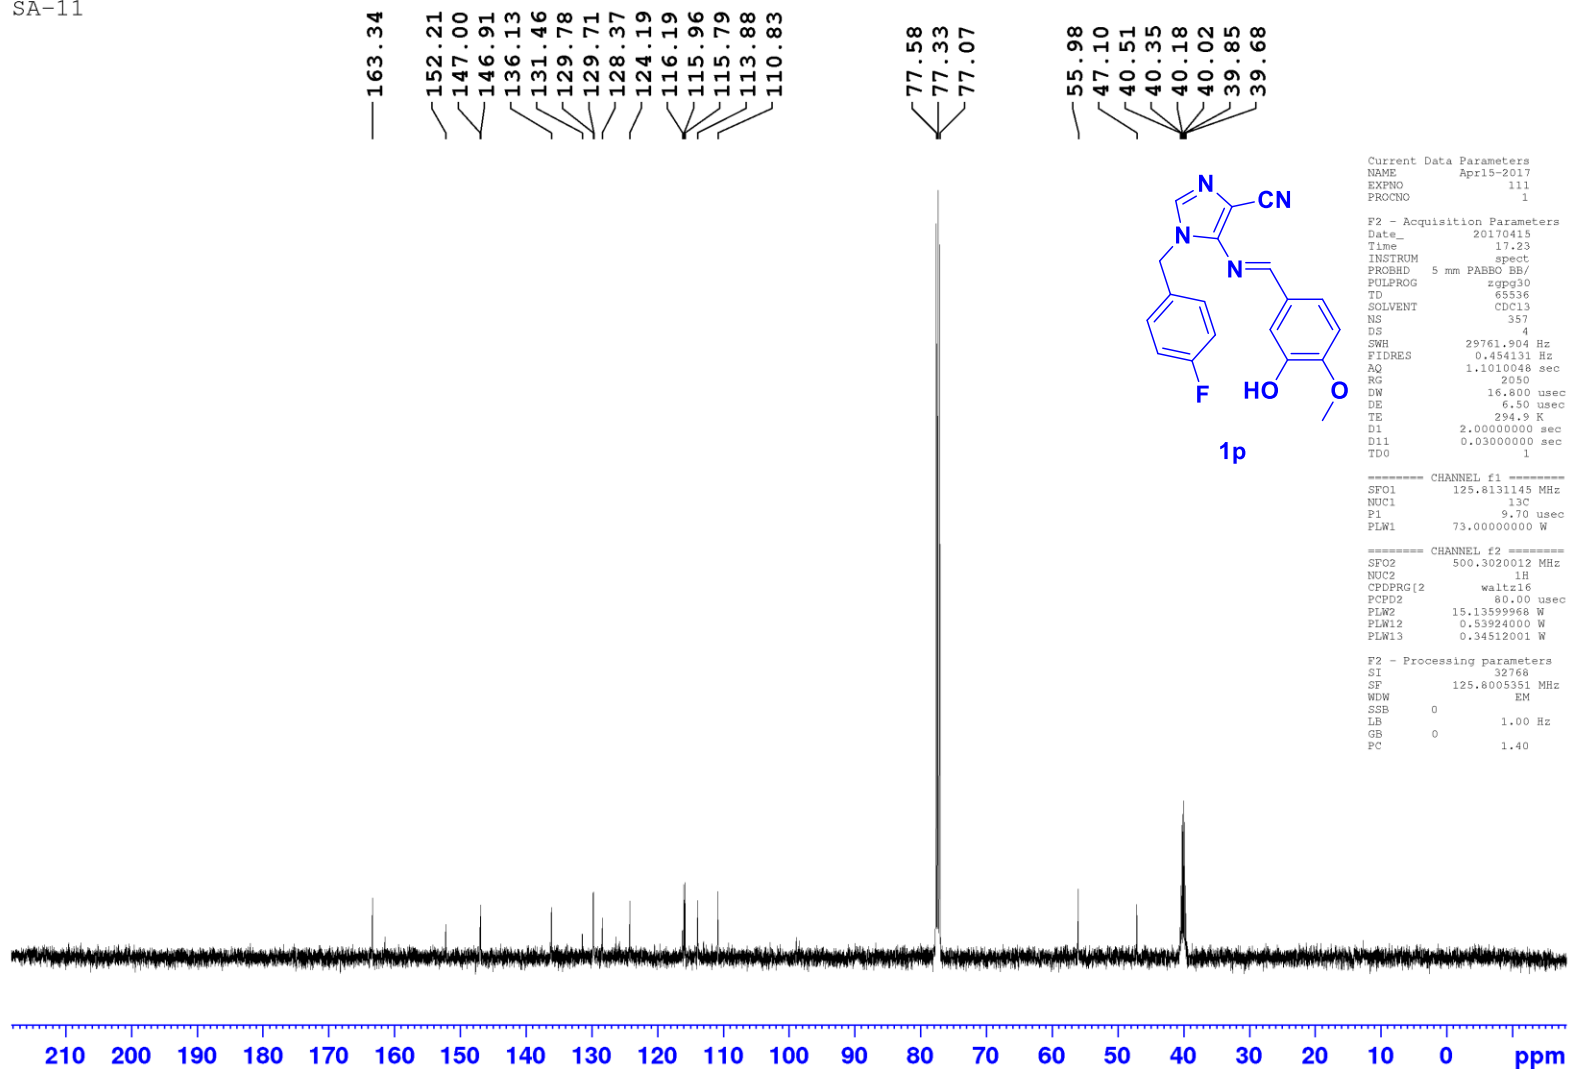

Line#:2 R.Time:5.600(Scan#:821)

MassPeaks:564

RawMode:Averaged 5.595-5.605(820-822) BasePeak:109(3565792)

BG Mode:Calc. from Peak Group 1 - Event 1

intensity

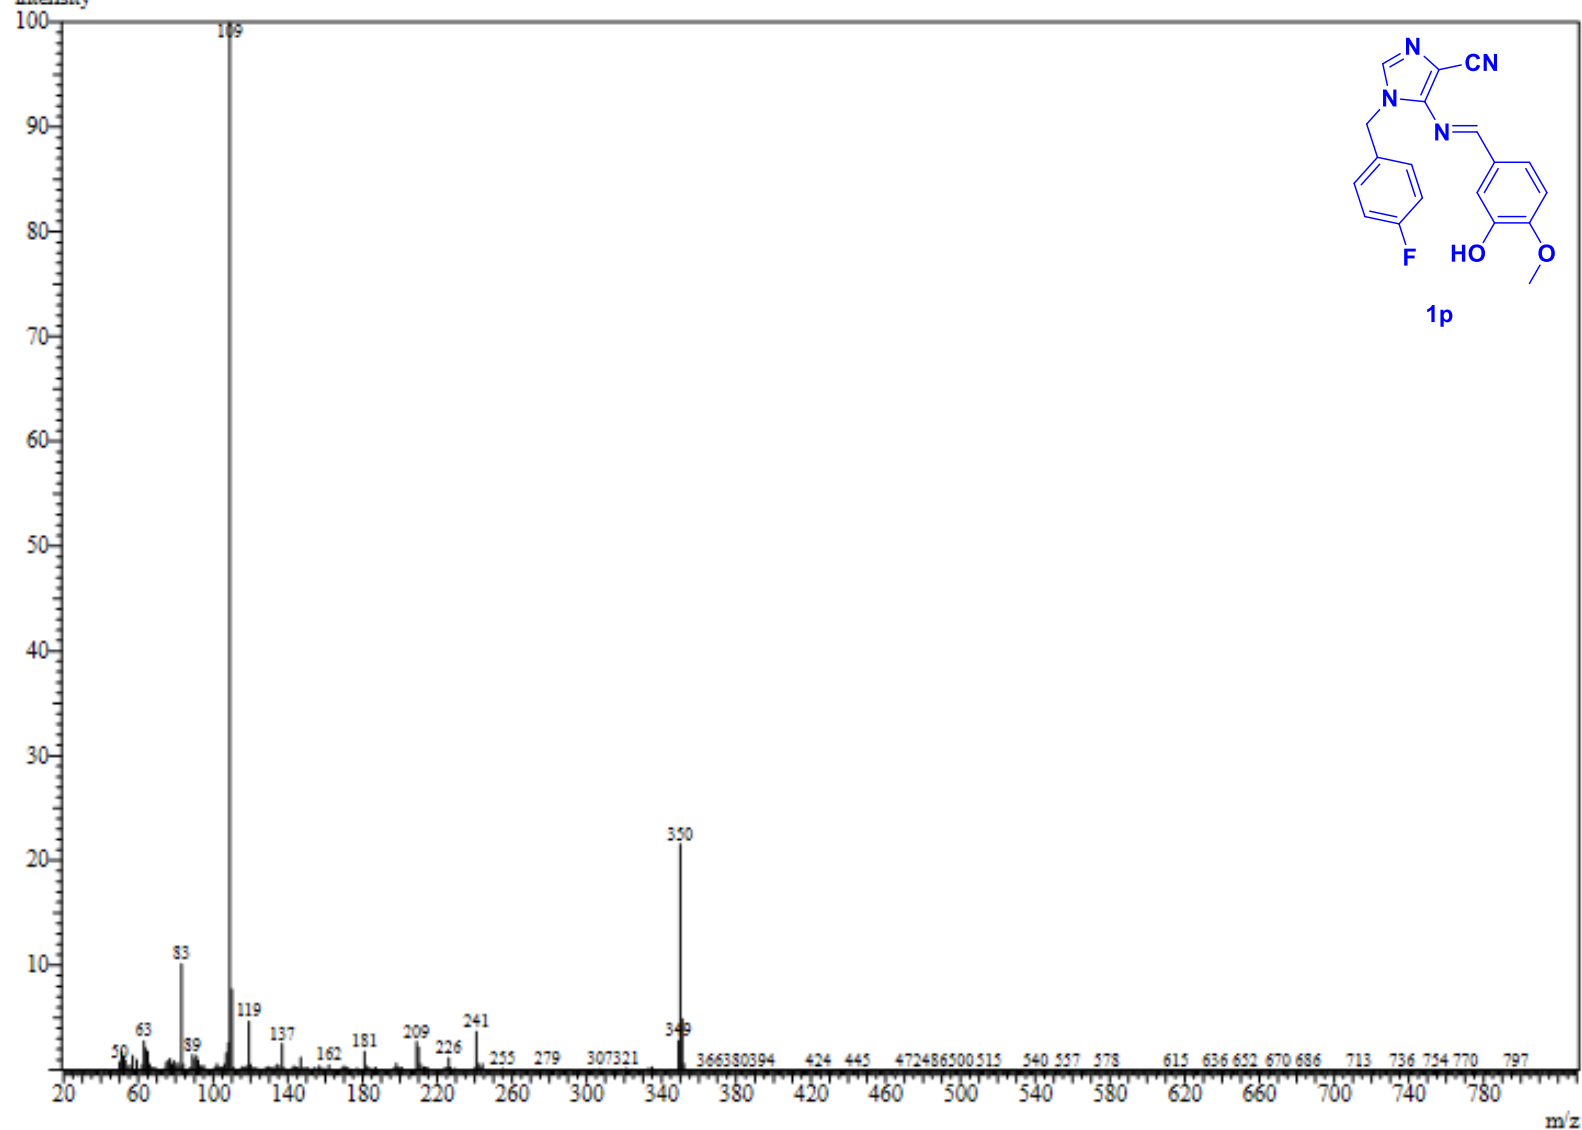

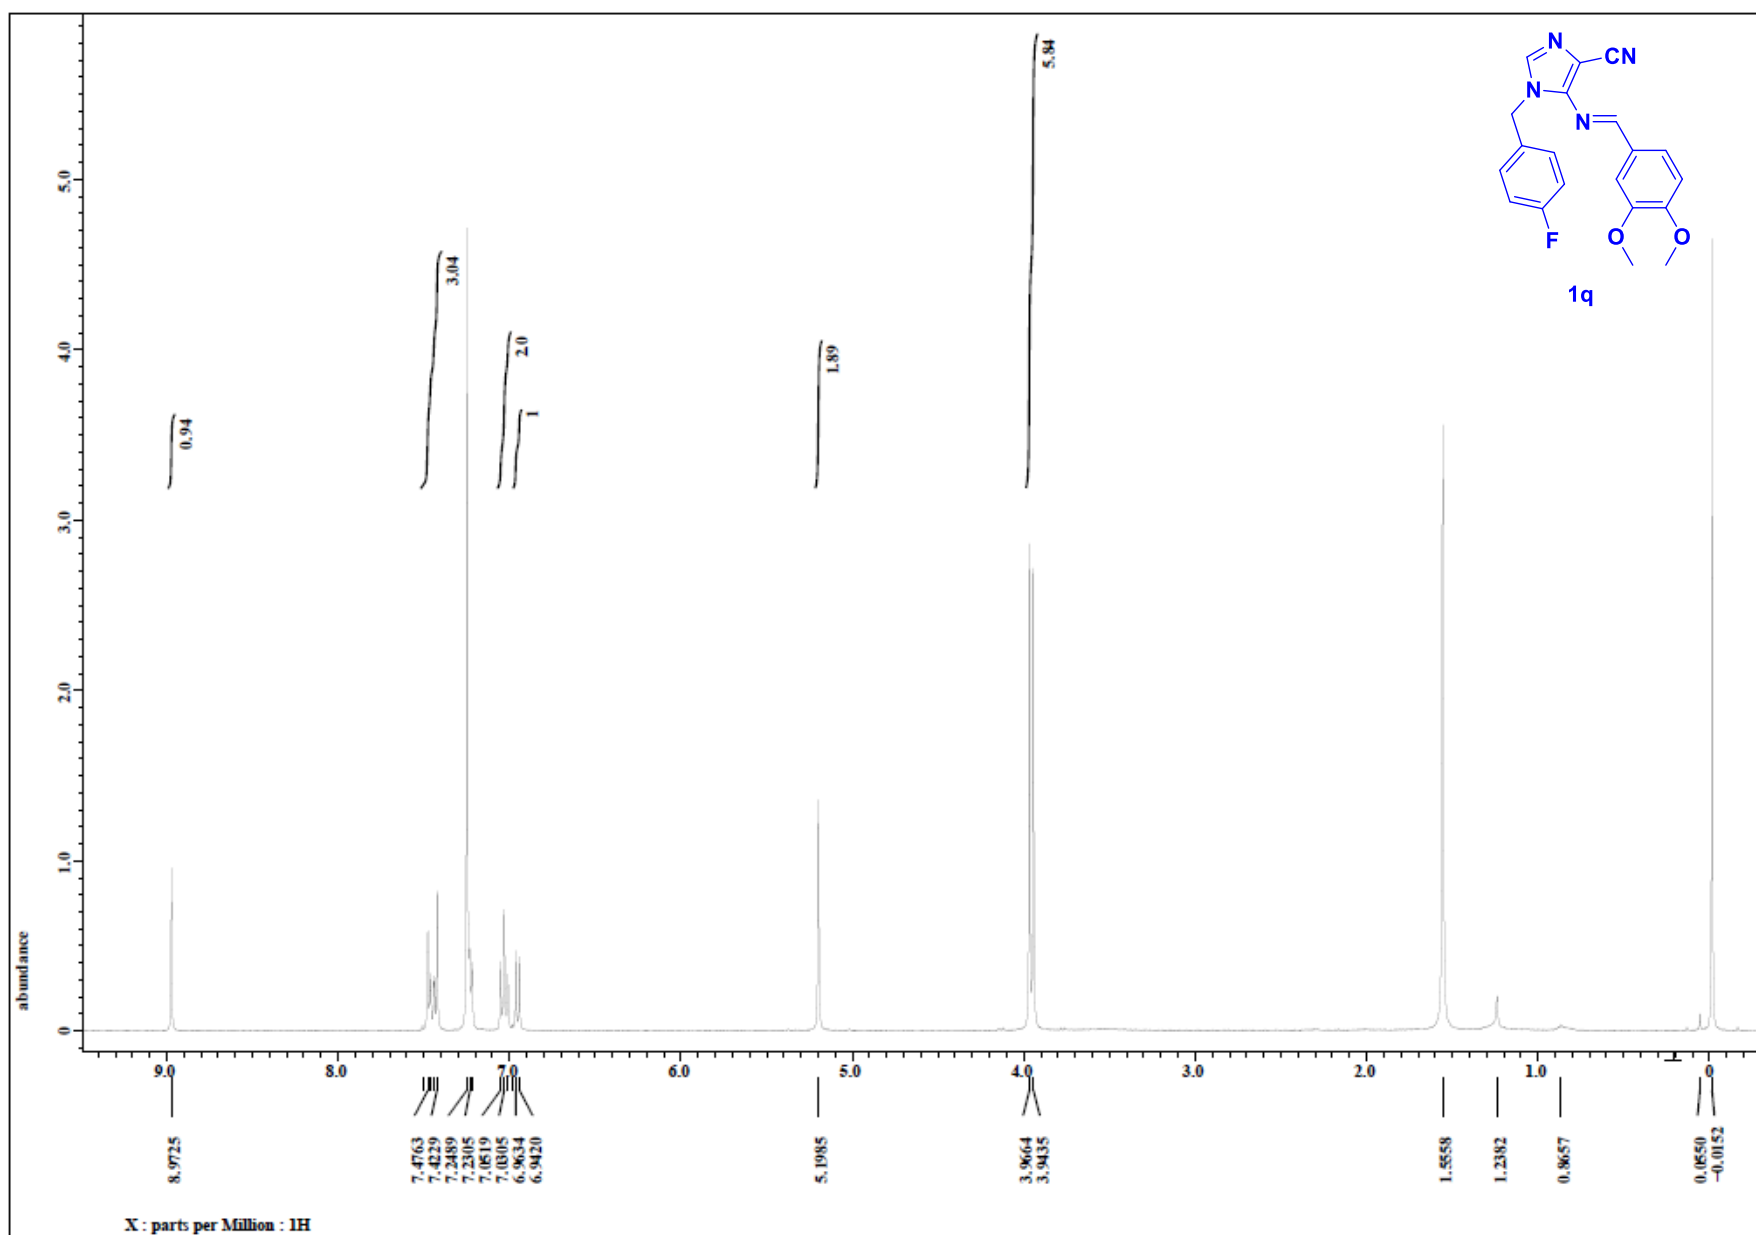

SA-12H

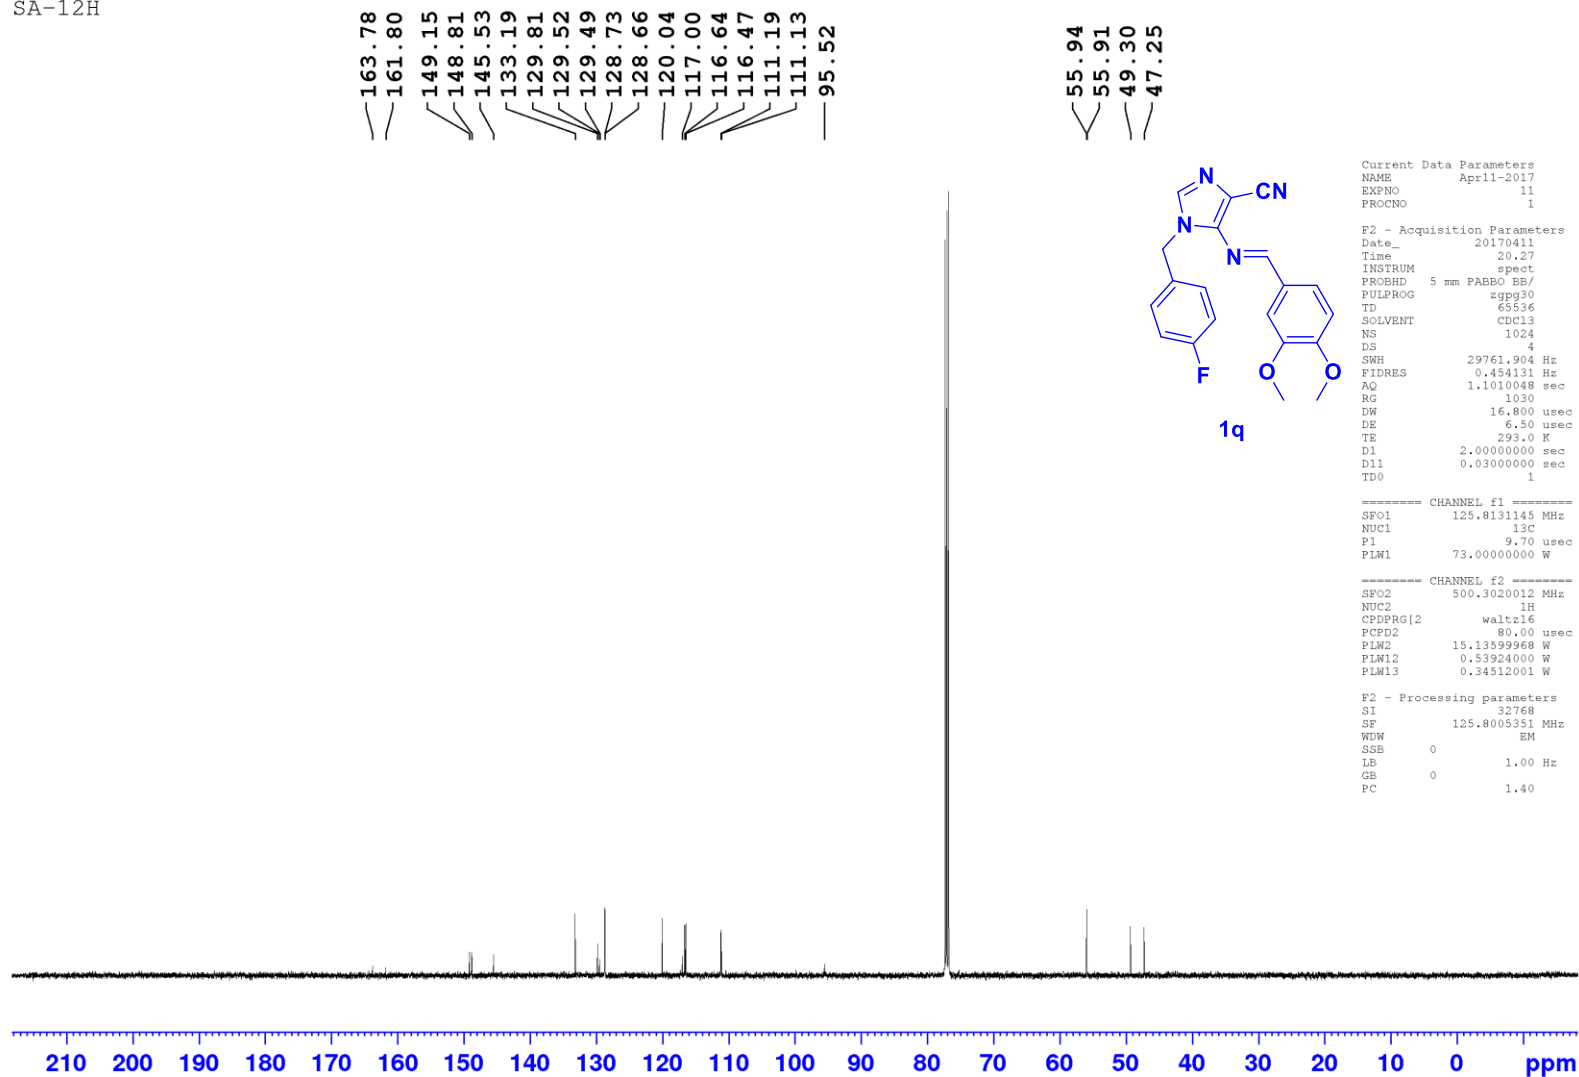

## Elemental Composition Report

Page 1

### Single Mass Analysis

Tolerance = 10.0 PPM / DBE: min = -1.5, max = 50.0

Element prediction: Off

Number of isotope peaks used for i-FIT = 5

Monoisotopic Mass, Even Electron Ions

43 formula(e) evaluated with 1 results within limits (up to 50 best isotopic matches for each mass)

Elements Used:

C: 9-22 H: 11-30 N: 0-5 O: 0-3 F: 0-1

Sample Name : SA-12

IITRPR

XEVO G2-XS QTOF

Test Name : HRMS-1

160120-SA-12 17 (0.174)

1: TOF MS ES+

4.61e+007

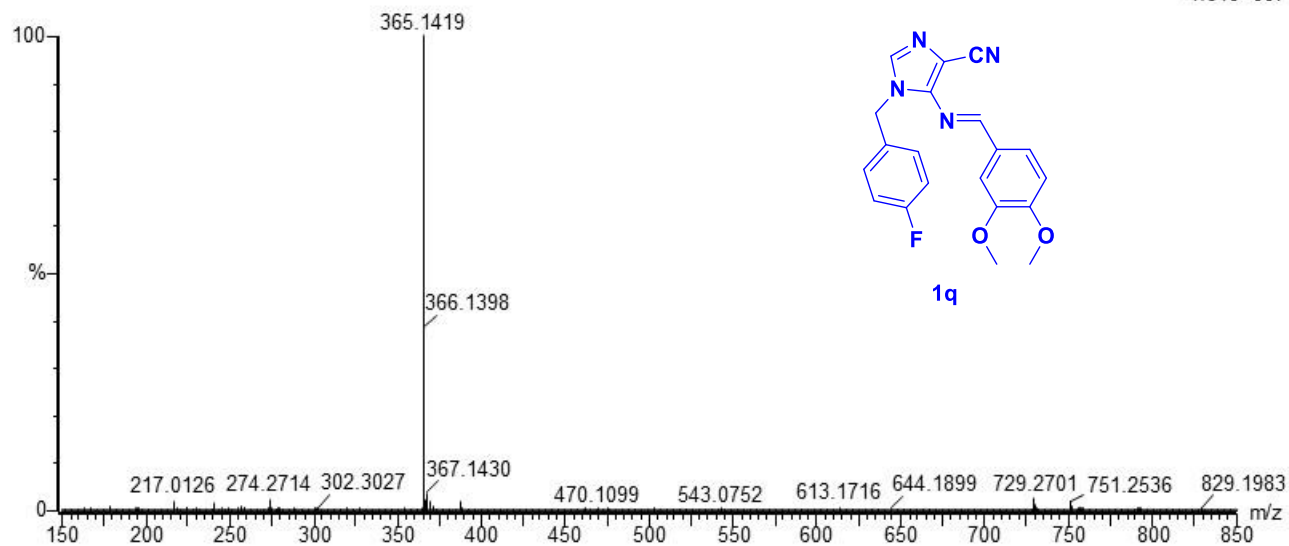

Minimum: -1.5

Maximum: 5.0 10.0 50.0

| Mass     | Calc. Mass | mDa | PPM | DBE  | i-FIT  | Norm | Conf(%) | Formula                                                         |
|----------|------------|-----|-----|------|--------|------|---------|-----------------------------------------------------------------|
| 365.1419 | 365.1414   | 0.5 | 1.4 | 13.5 | 2169.2 | n/a  | n/a     | C <sub>20</sub> H <sub>18</sub> N <sub>4</sub> O <sub>2</sub> F |

# Spectrum

Line#:1 R.Time:6.395(Scan#:980)

MassPeaks:305

RawMode:Averaged 6.395-6.400(980-981) BasePeak:364(14417)

BG Mode:Calc. from Peak Group 1 - Event 1

intensity

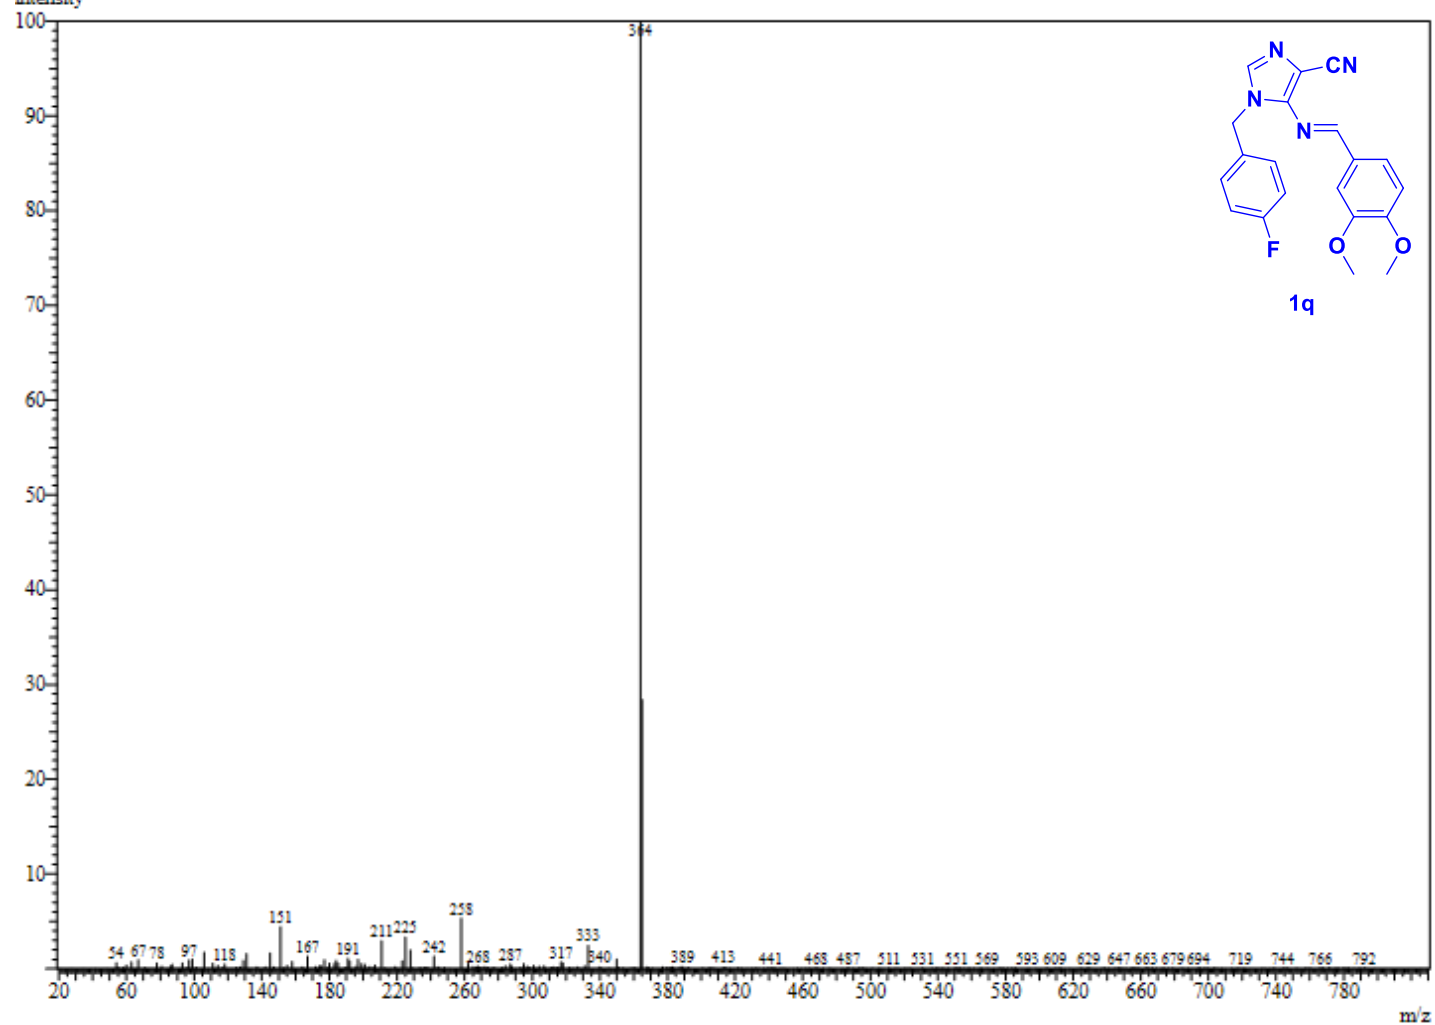

SA-13

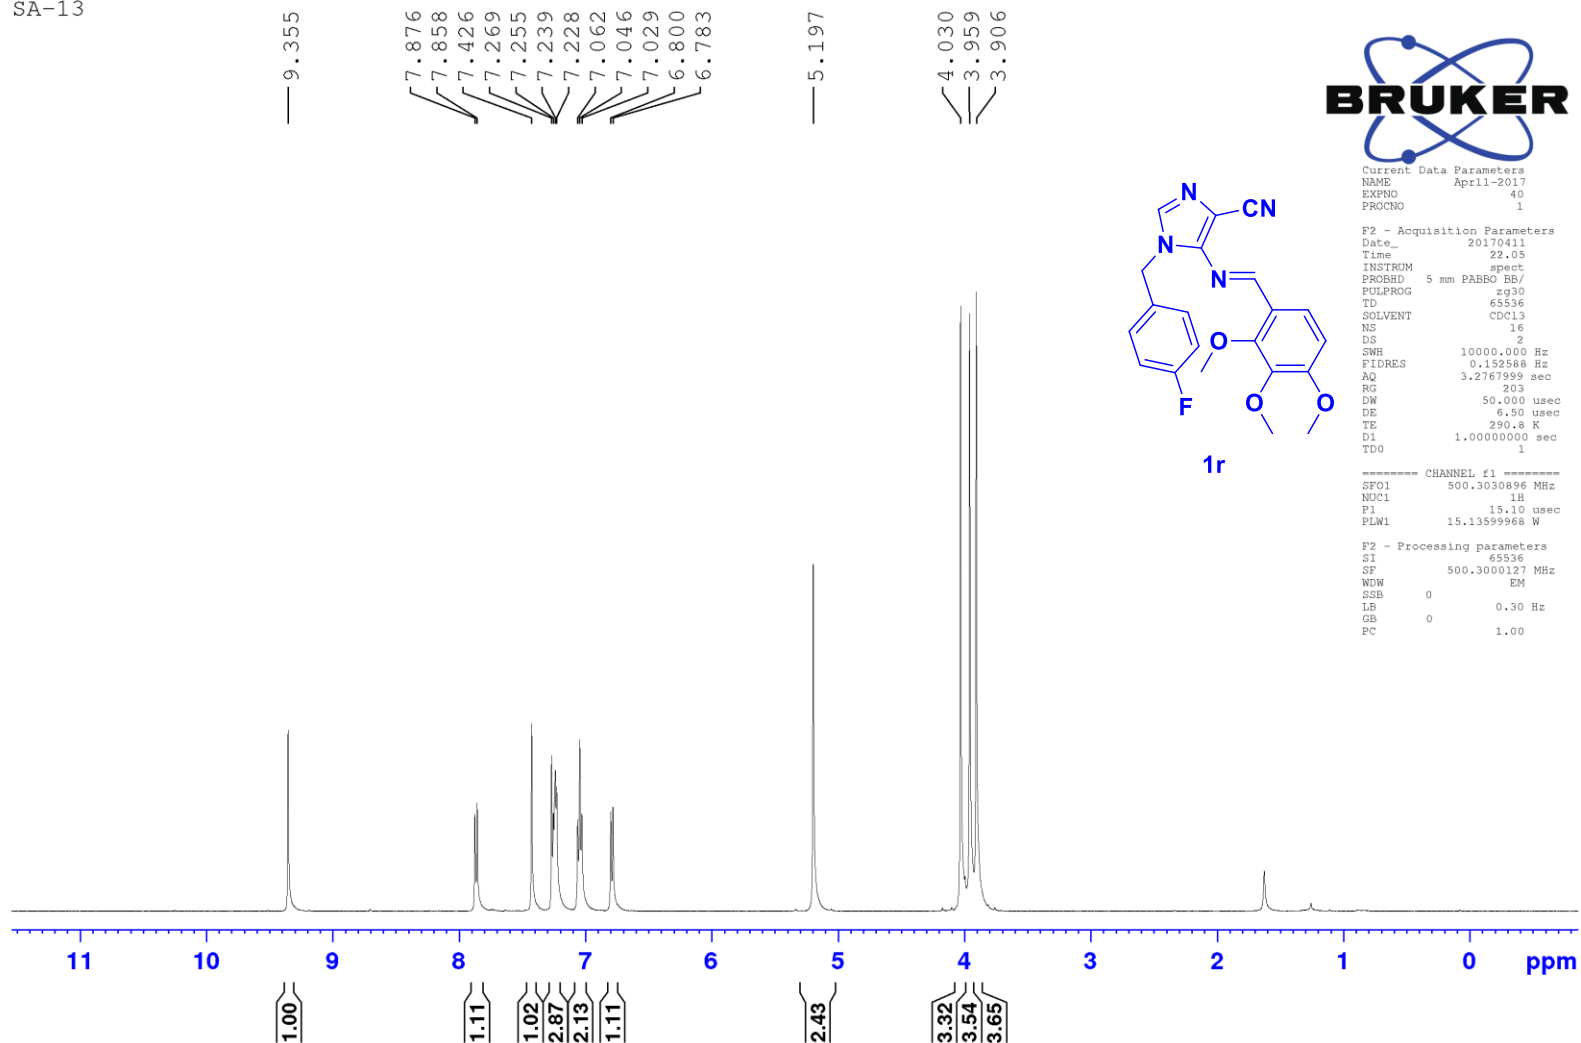

SA-13

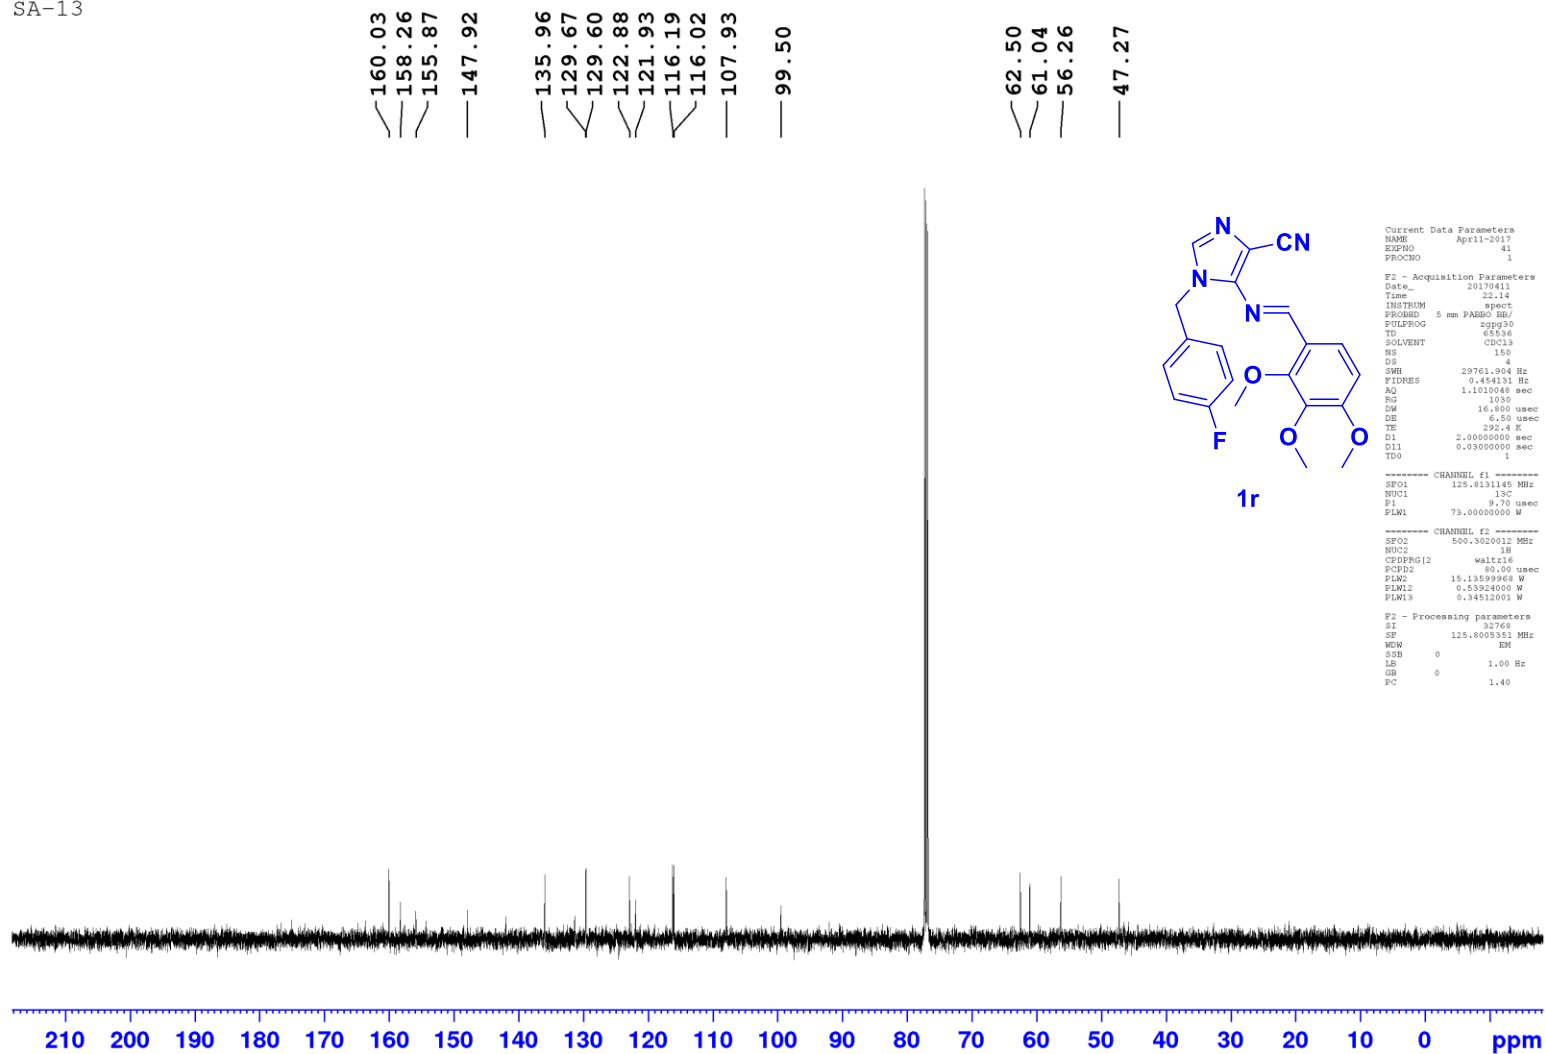

# Spectrum

Line#:1 R.Time:6.410(Scan#:983)

MassPeaks:589

RawMode:Averaged 6.405-6.415(982-984) BasePeak:109(6930995)

BG Mode:Calc. from Peak Group 1 - Event 1

intensity

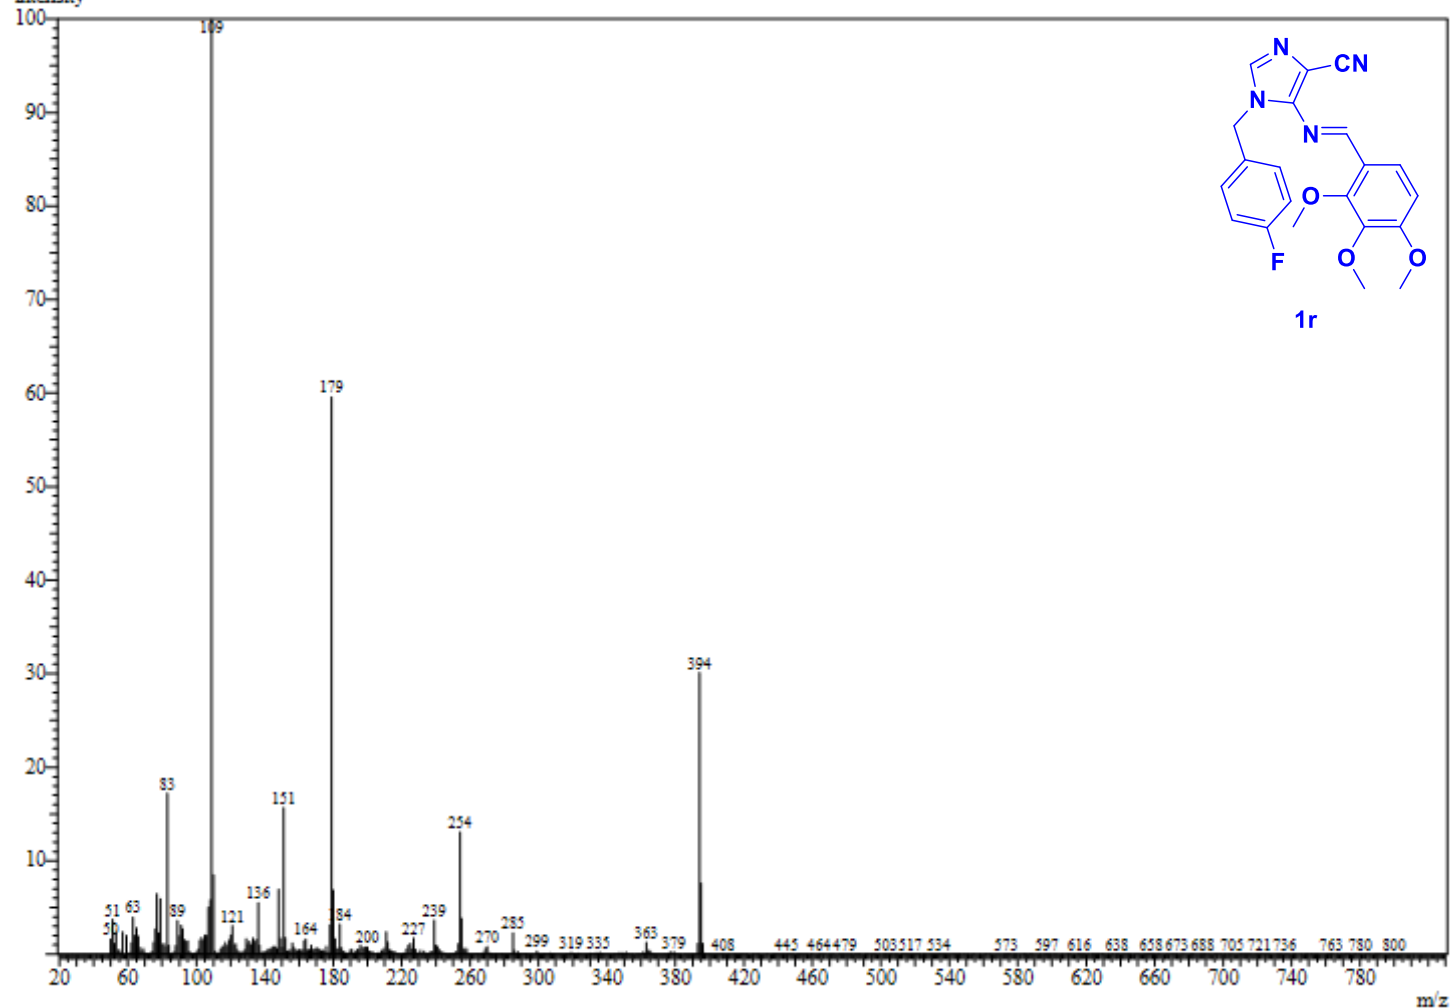

## Series 2

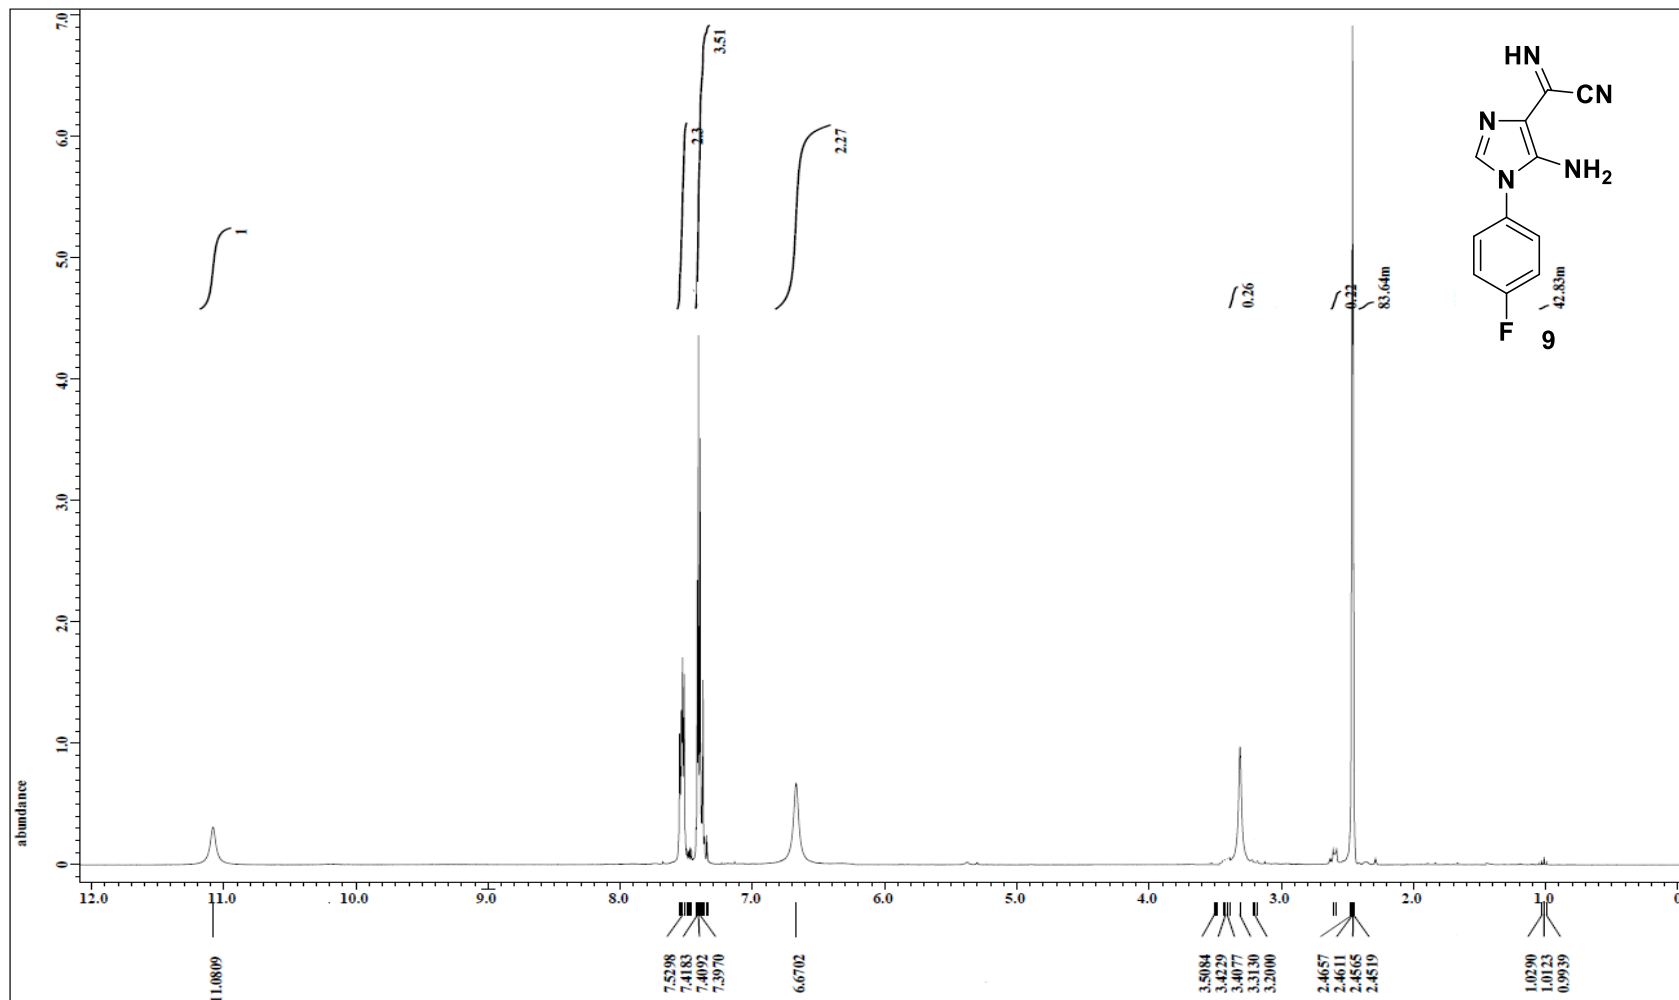

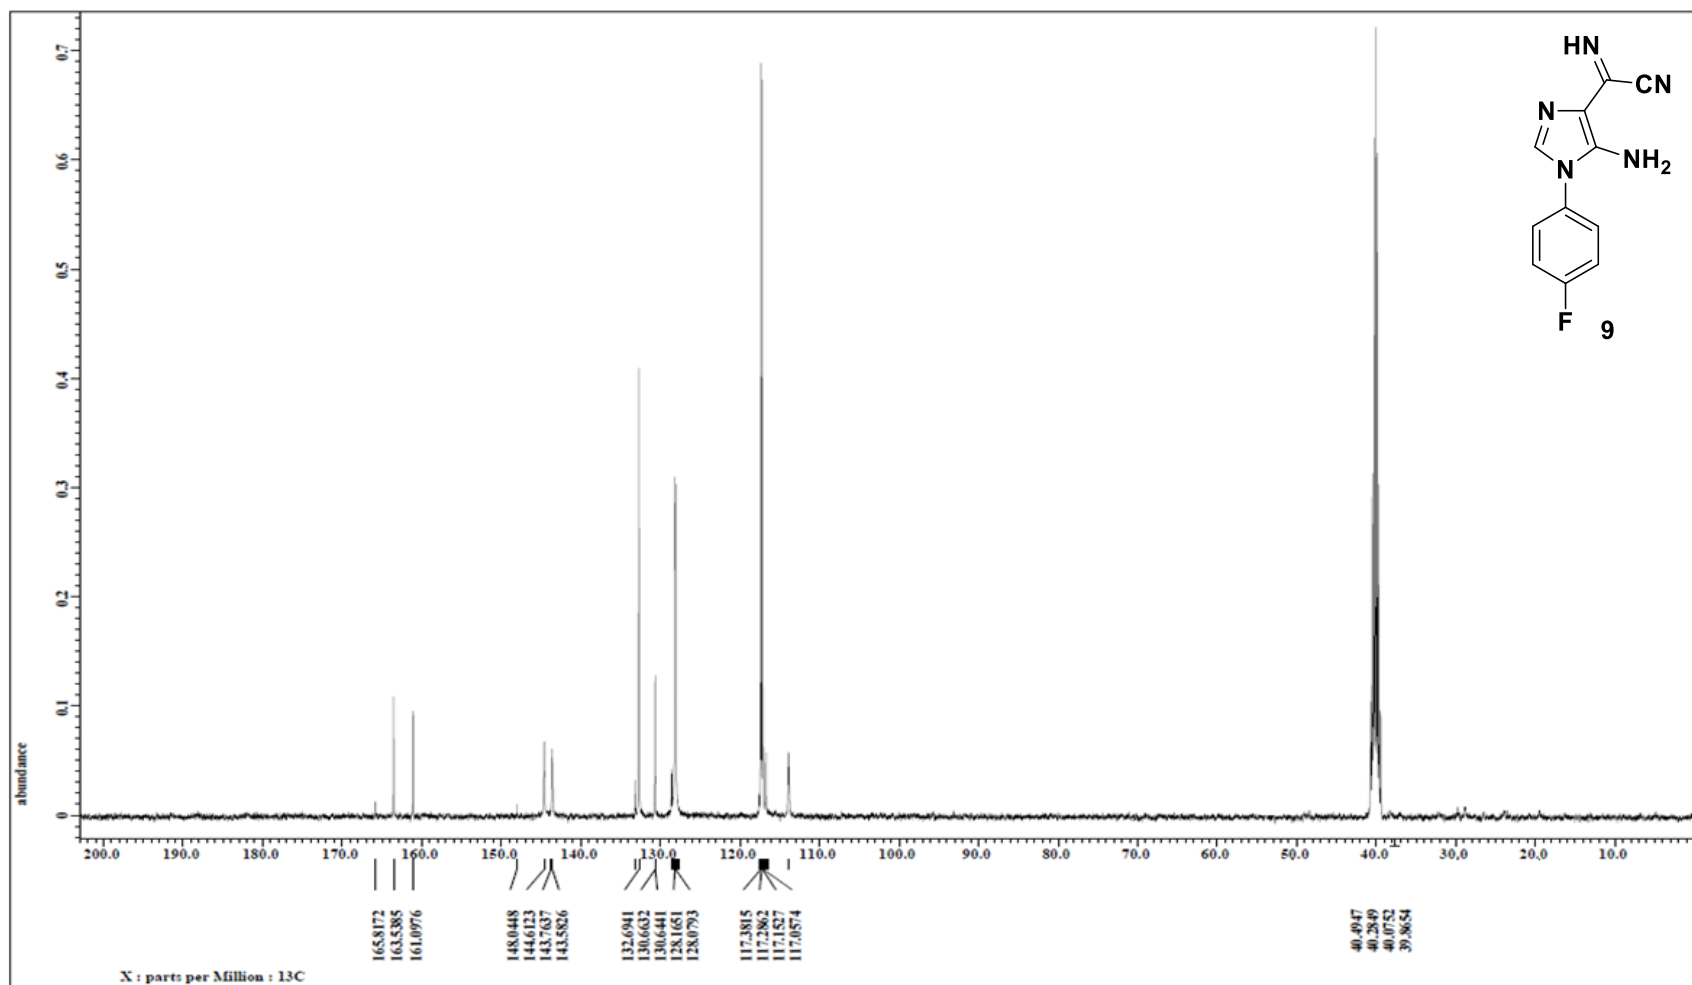

# Elemental Composition Report

Page 1

## Single Mass Analysis

Tolerance = 5.0 PPM / DBE: min = -1.5, max = 50.0

Element prediction: Off

Number of isotope peaks used for i-FIT = 5

Monoisotopic Mass, Even Electron Ions

65 formula(e) evaluated with 1 results within limits (up to 50 best isotopic matches for each mass)

Elements Used:

C: 9-22 H: 8-25 N: 0-5 O: 0-3 F: 0-1

Sample Name : Int-2

IITRPR

XEVO G2-XS QTOF

Test Name : HRMS-1

160120-Int-2 12 (0.131)

1: TOF MS ES+

1.59e+008

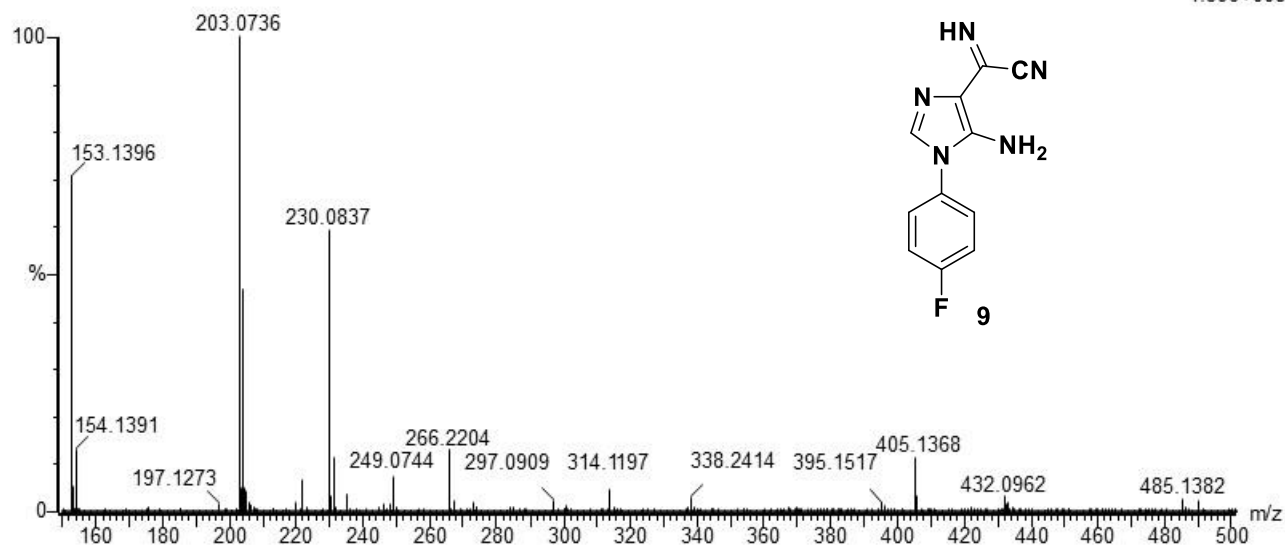

Minimum: -1.5

Maximum: 5.0 5.0 50.0

| Mass     | Calc. Mass | mDa  | PPM  | DBE | i-FIT  | Norm | Conf(%) | Formula     |
|----------|------------|------|------|-----|--------|------|---------|-------------|
| 230.0837 | 230.0842   | -0.5 | -2.2 | 9.5 | 2053.6 | n/a  | n/a     | C11 H9 N5 F |

Line#:2 R.Time:5.775(Scan#:856)

MassPeaks:687

RawMode:Averaged 5.770-5.780(855-857) BasePeak:273(1487875)

BG Mode:Calc. from Peak Group 1 - Event 1

intensity

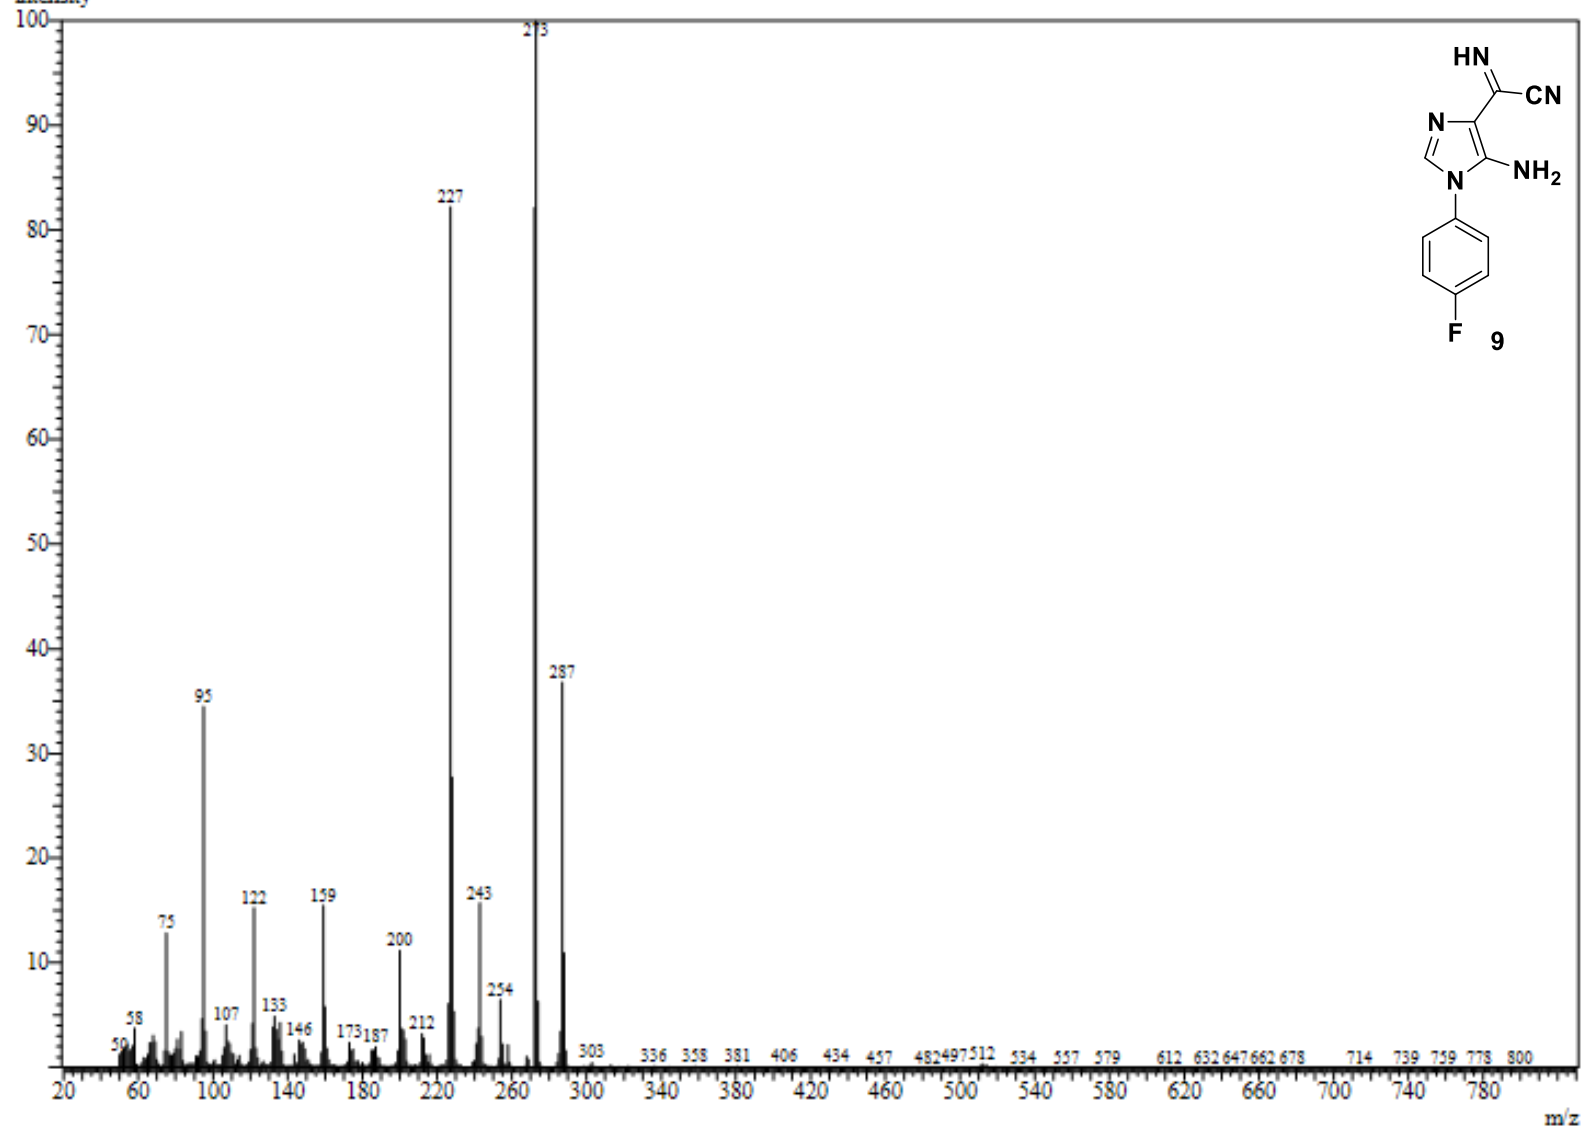

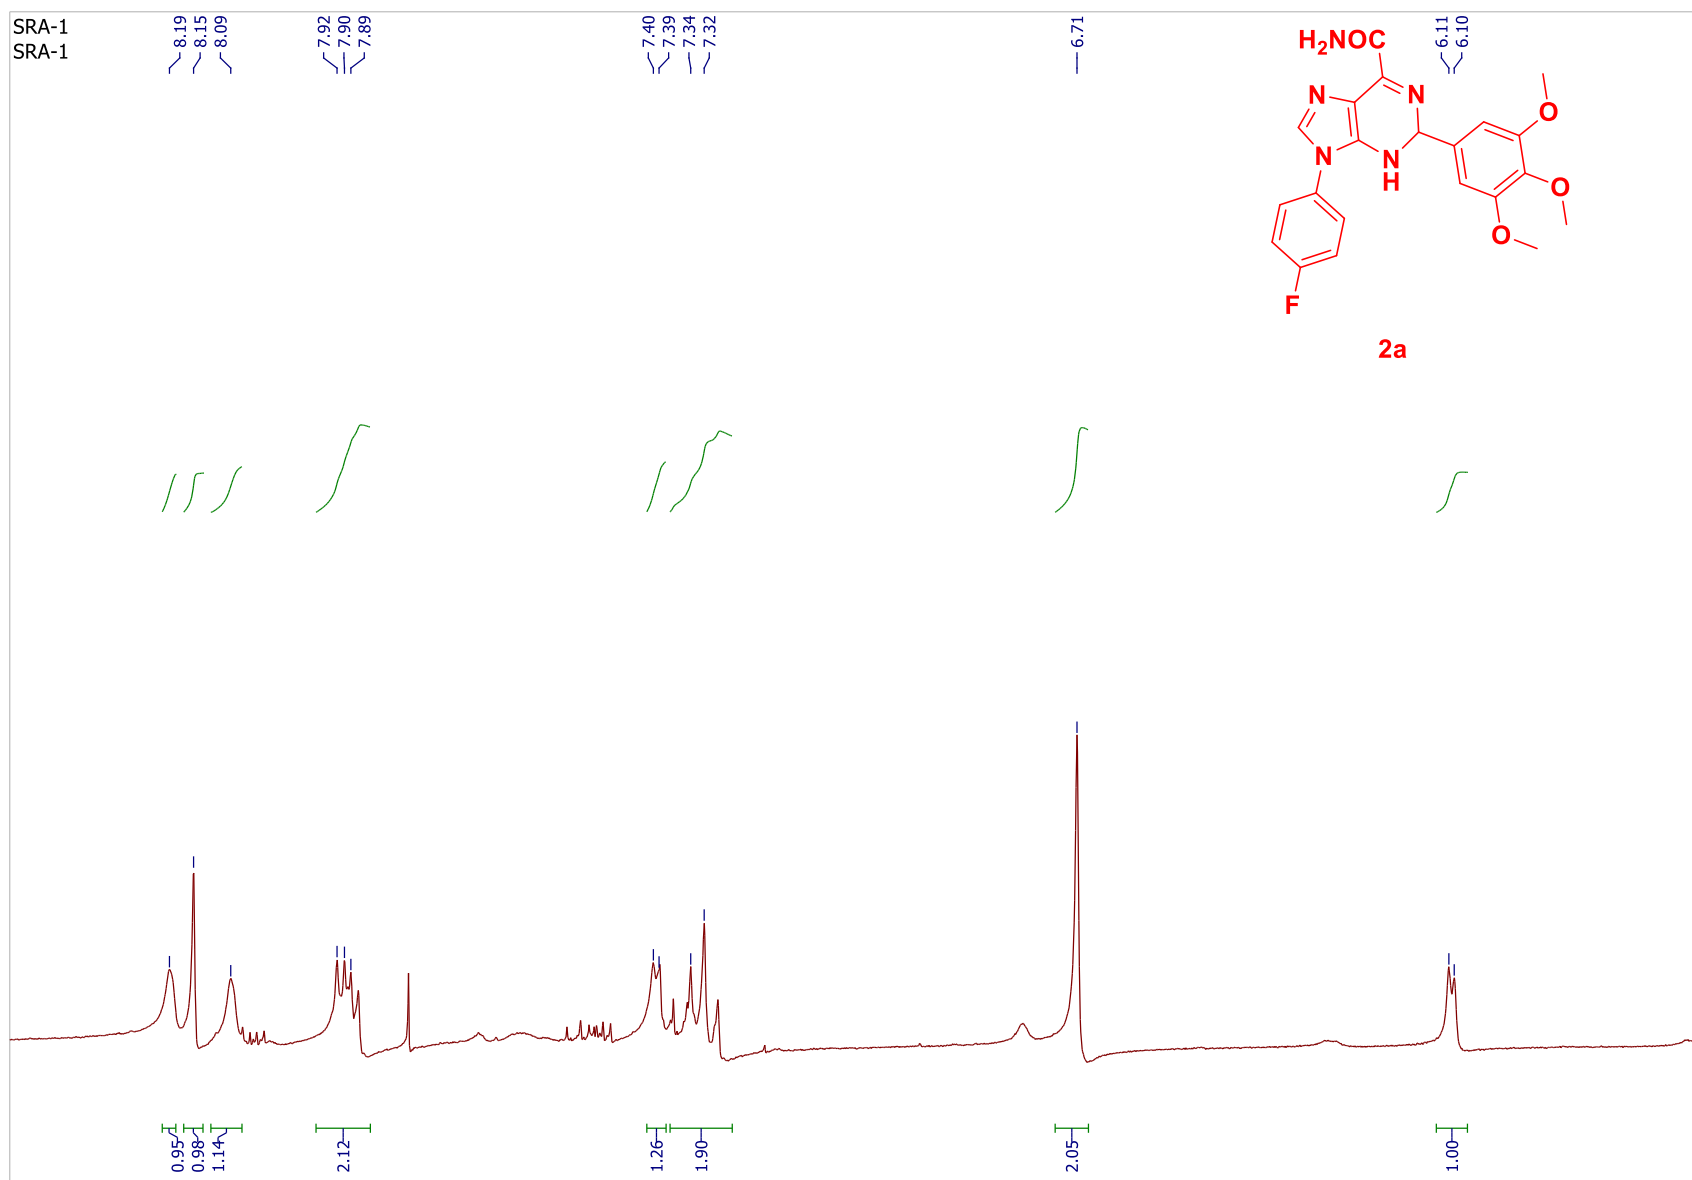

SRA-1  
SRA-1

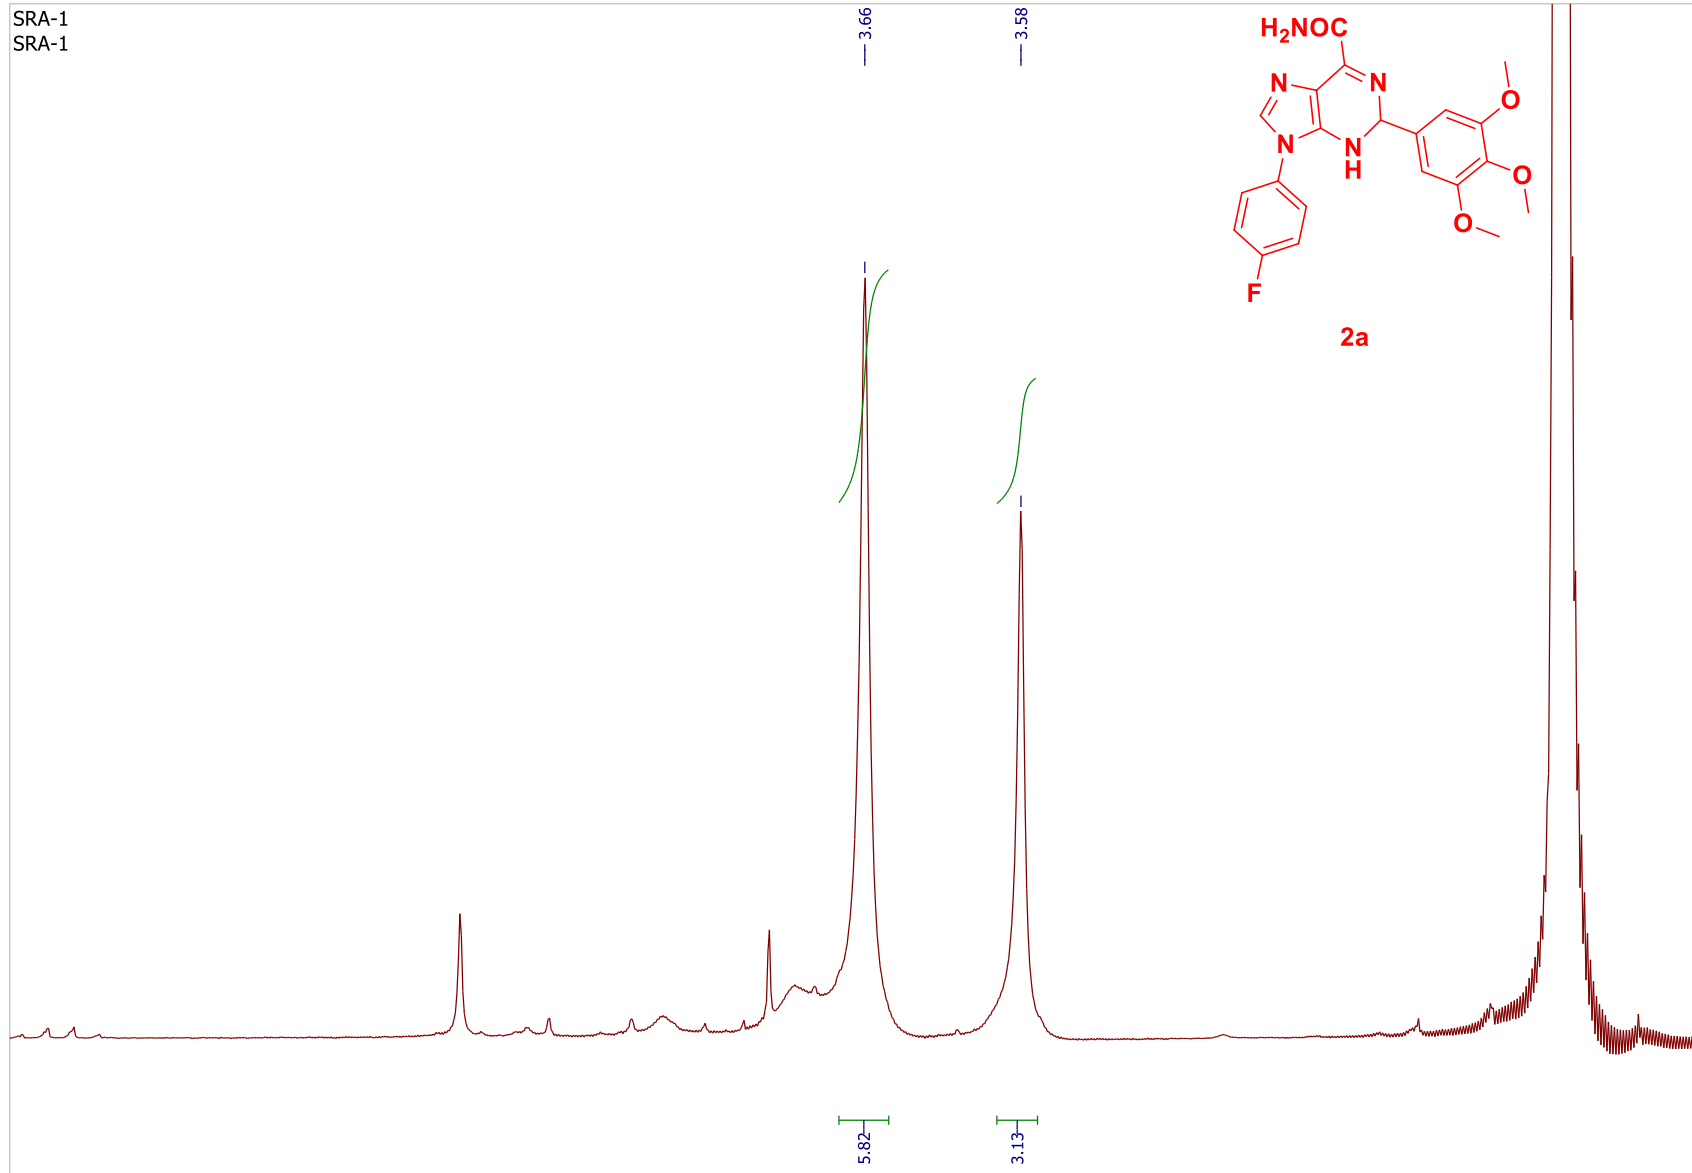

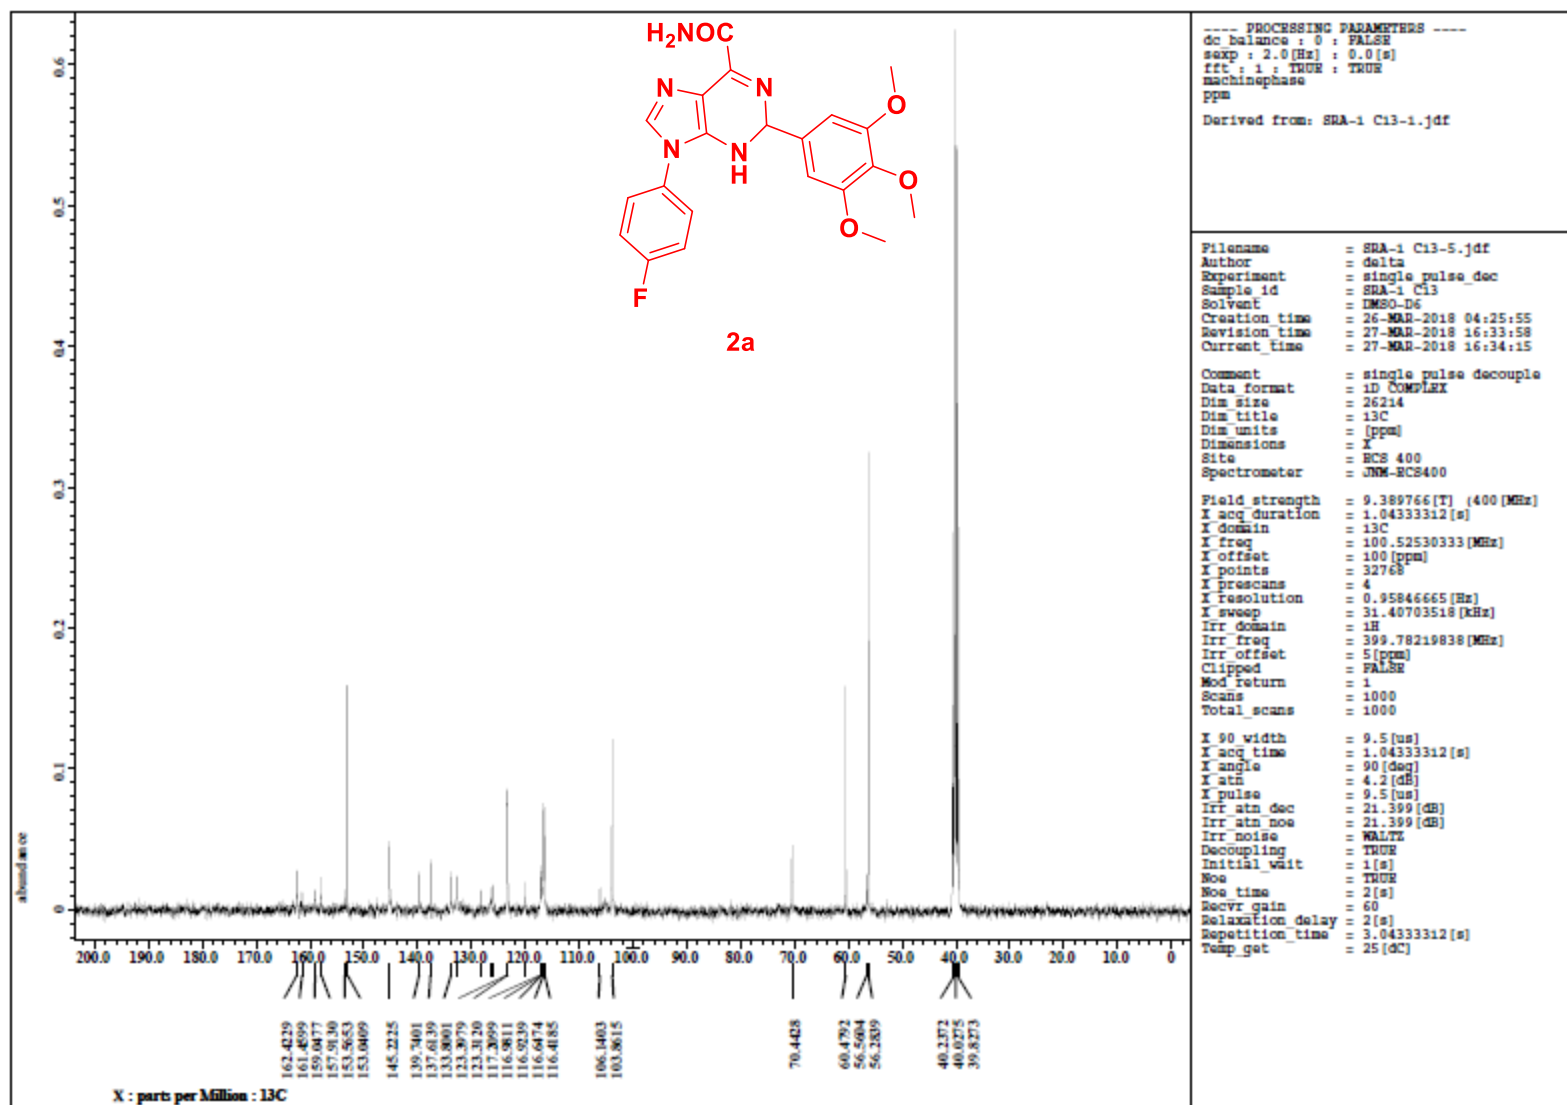

Sample Name : SRA-1  
Test Name : HRMS-1

INDIAN INSTITUTE OF TECHNOLOGY  
ROPAR

XEVO G2-XS QTOF

1: TOF MS ES+  
1.02e7

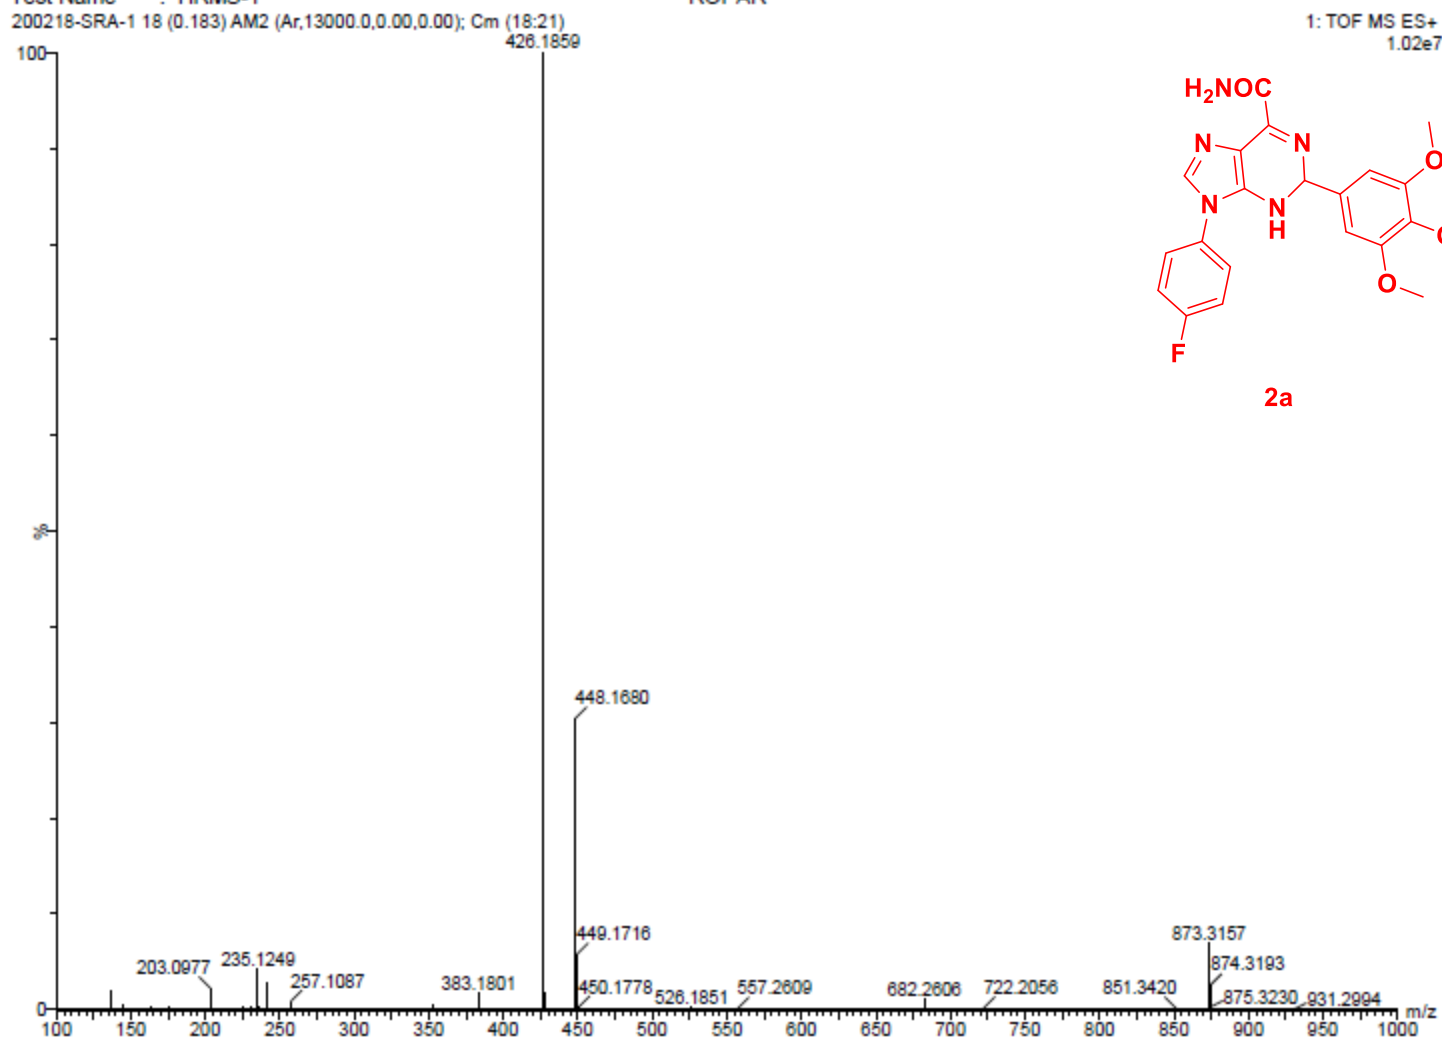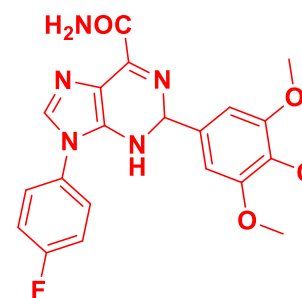

2a

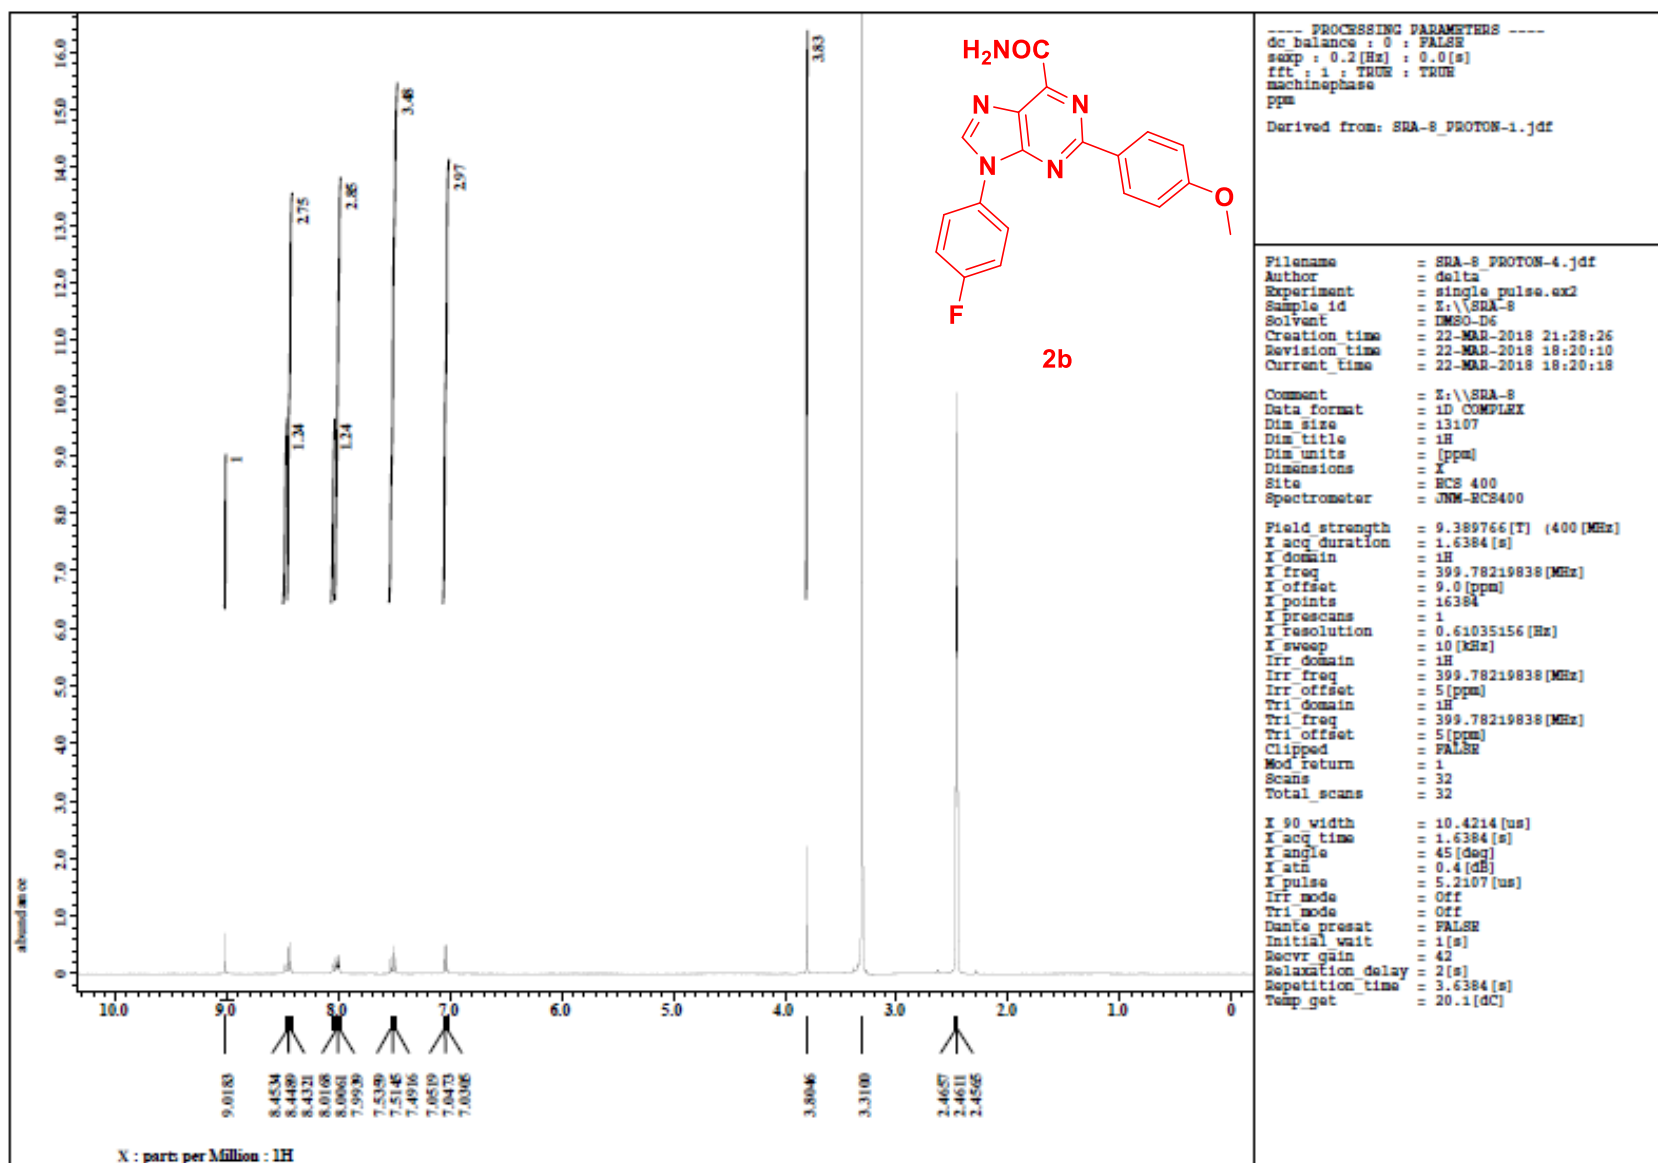

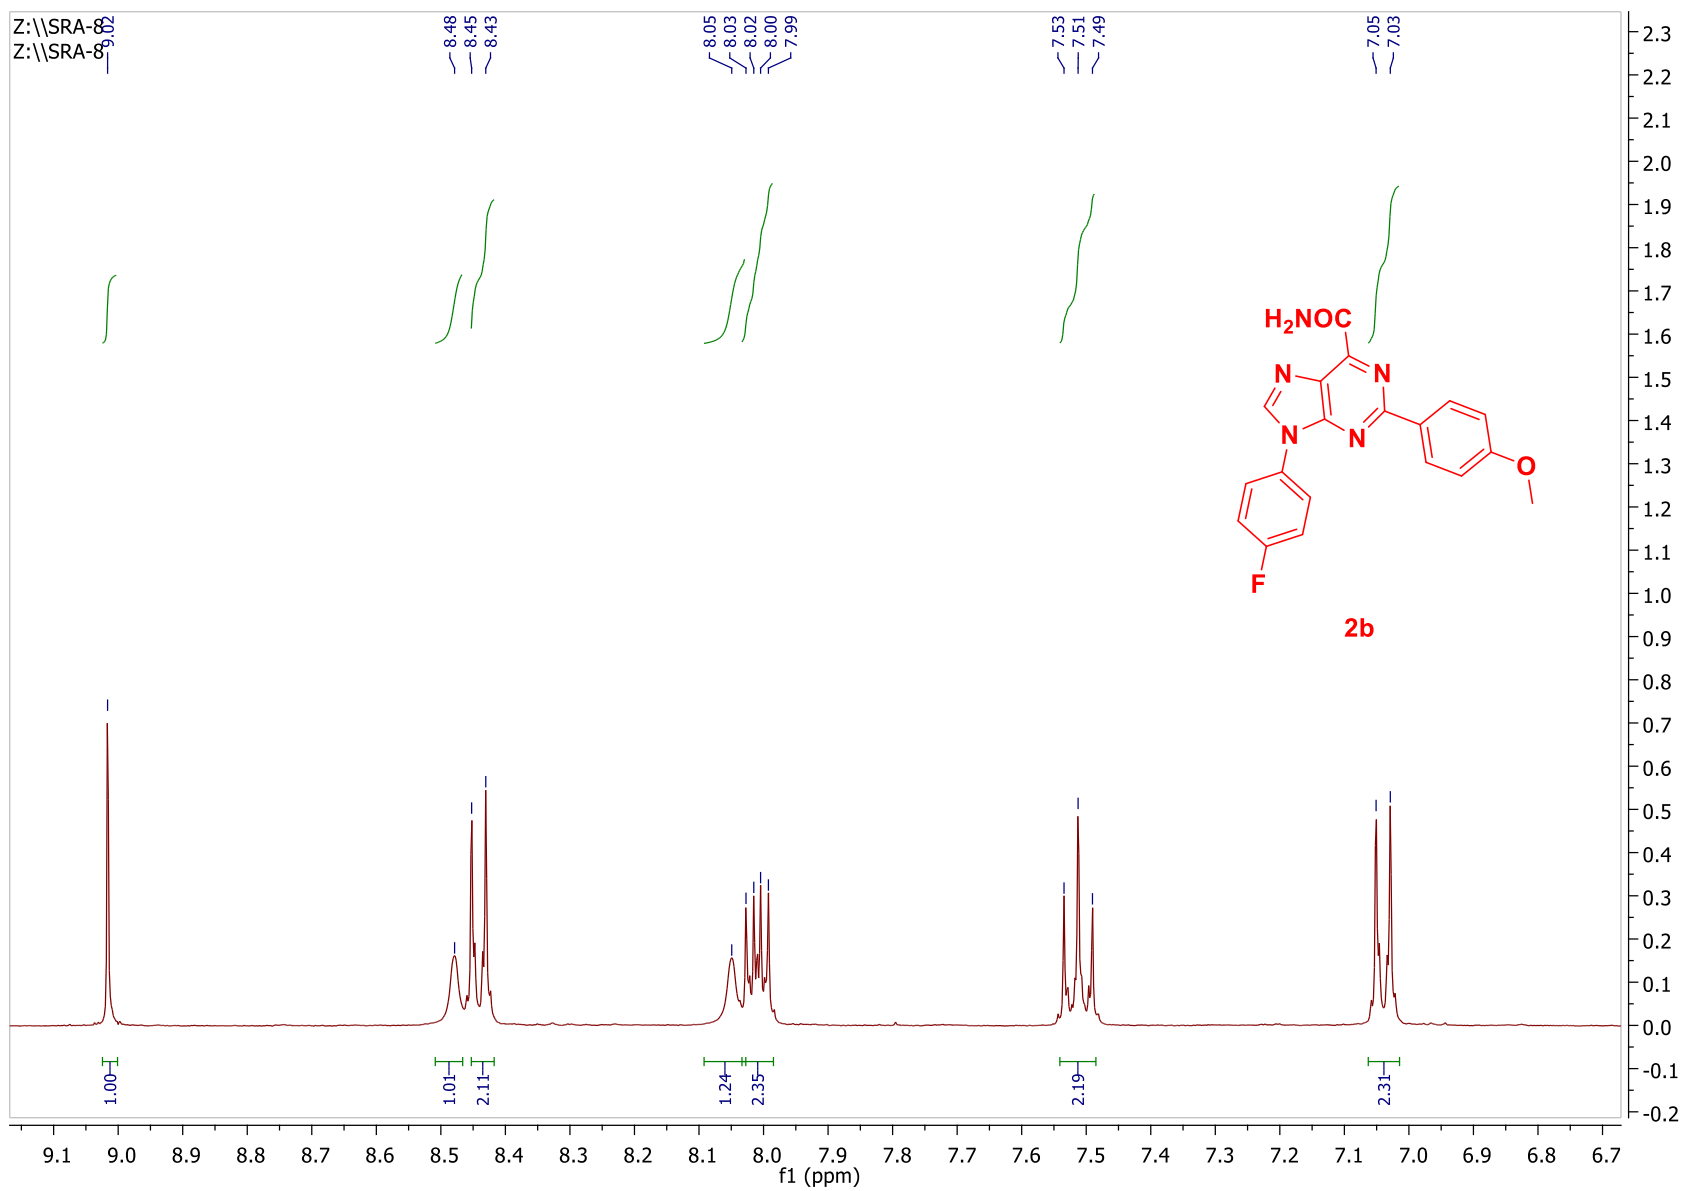

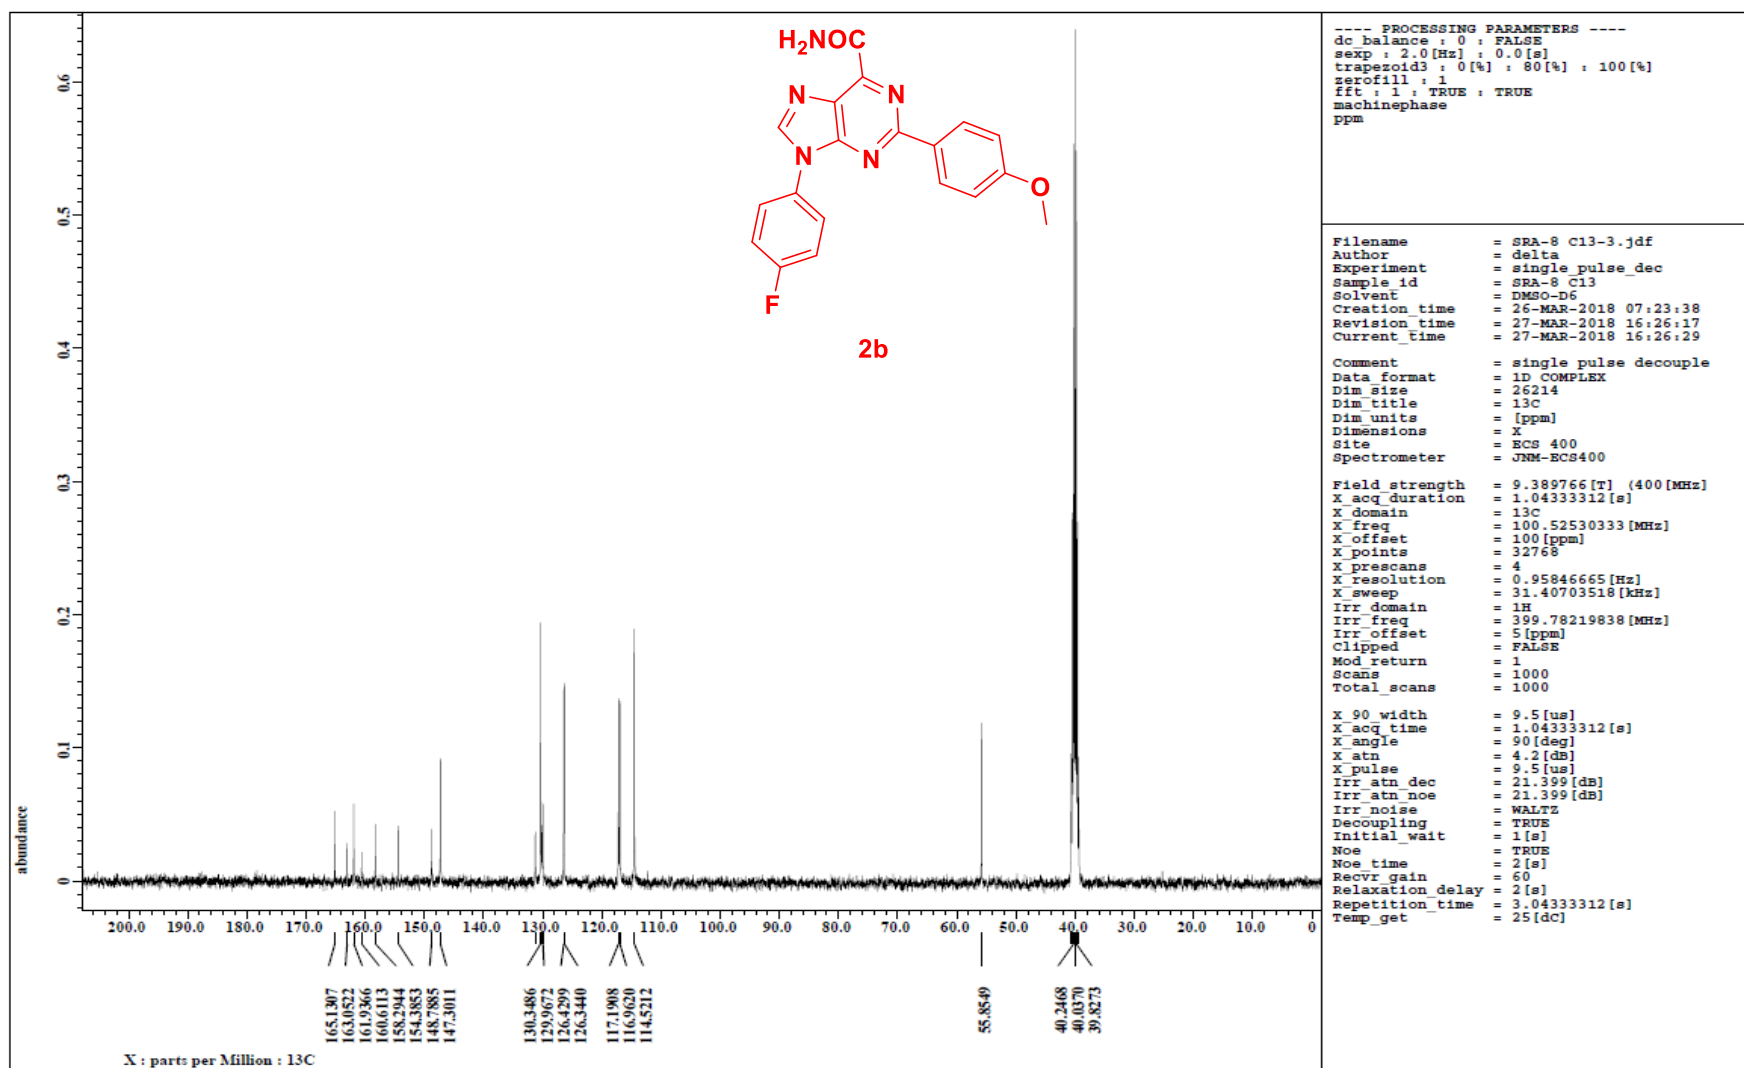

Sample Name : SRA-8  
Test Name : HRMS-1

INDIAN INSTITUTE OF TECHNOLOGY  
ROPAR

XEVO G2-XS QTOF

1: TOF MS ES+  
7.61e7

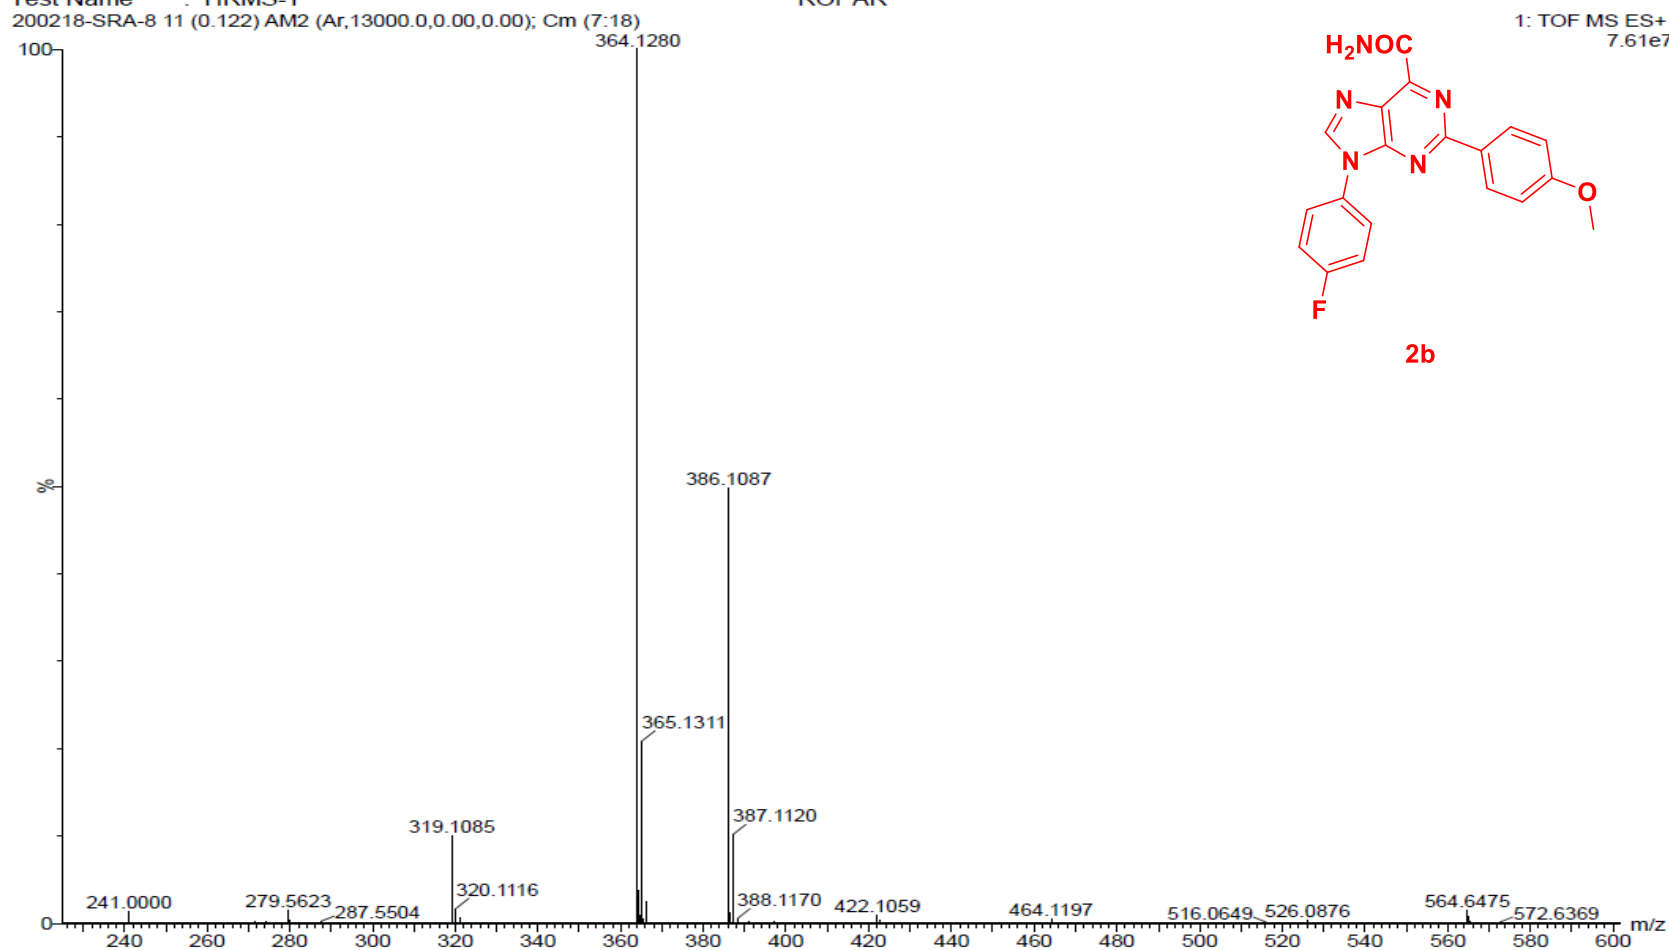

SRA-12  
SRA-12

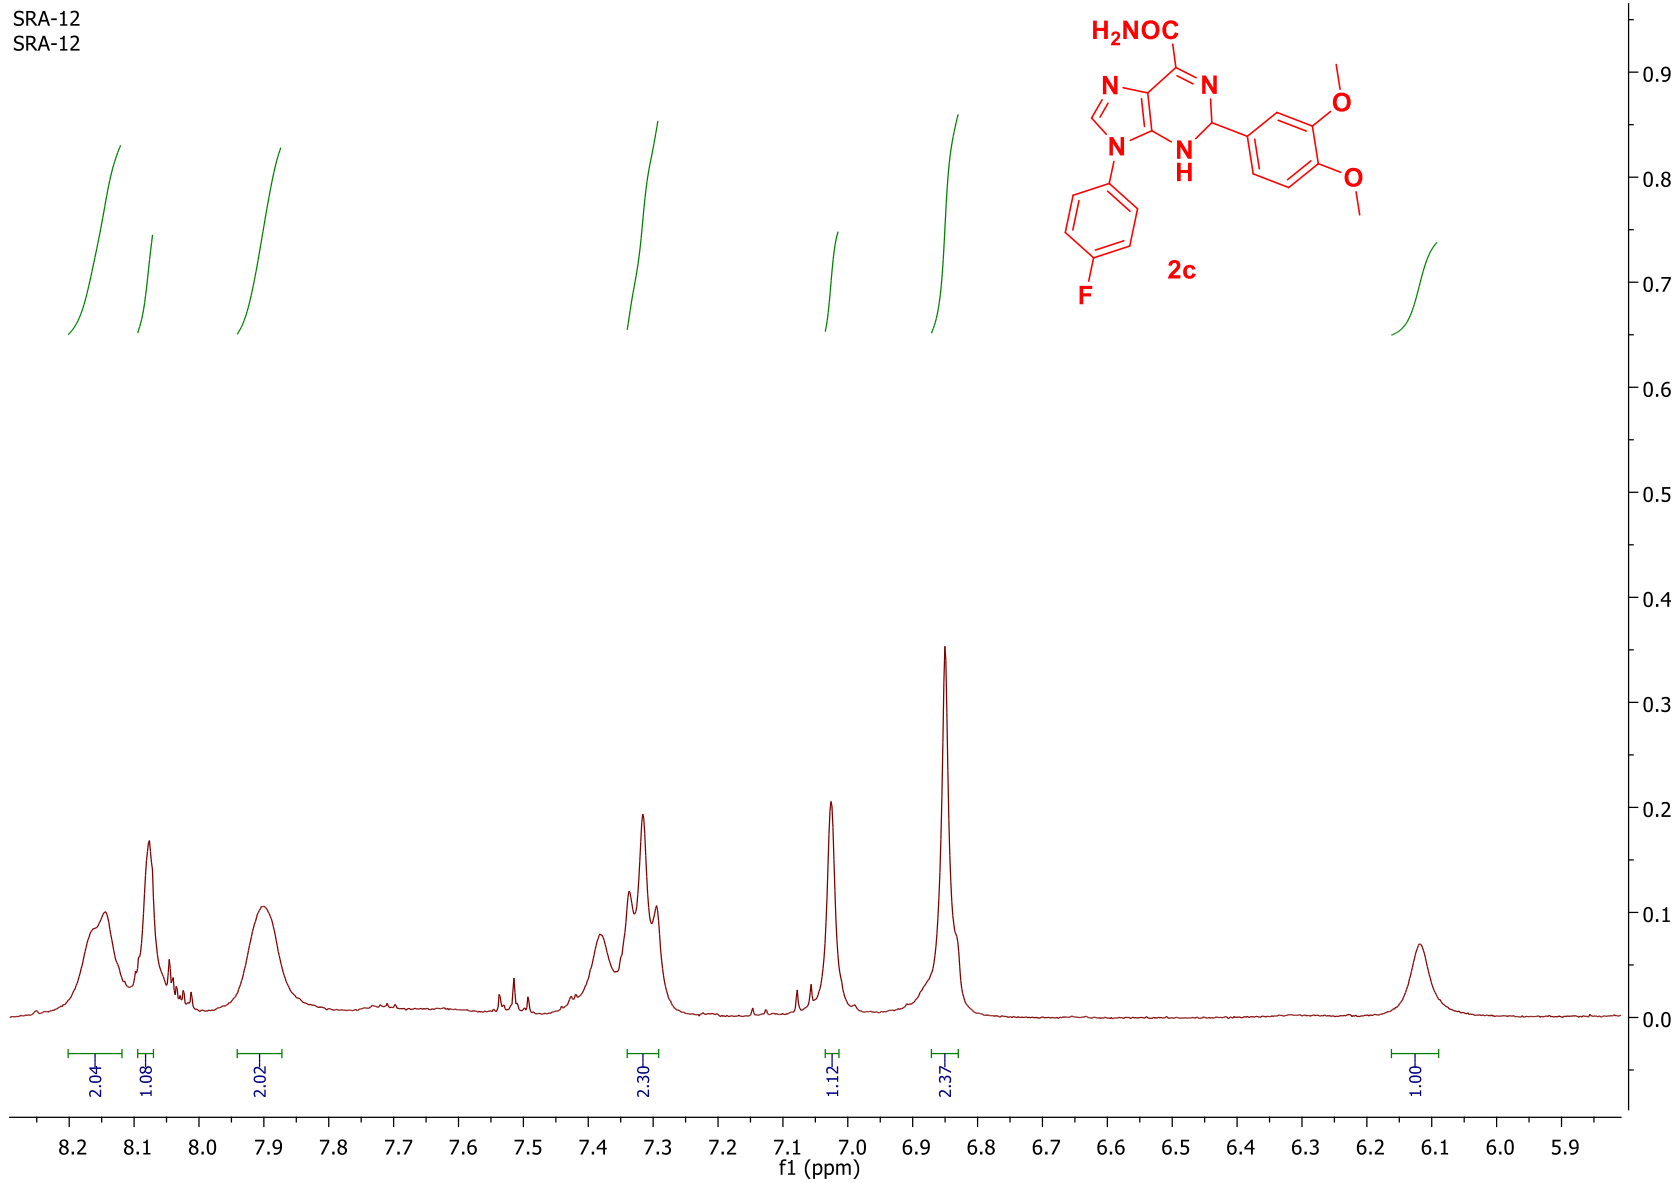

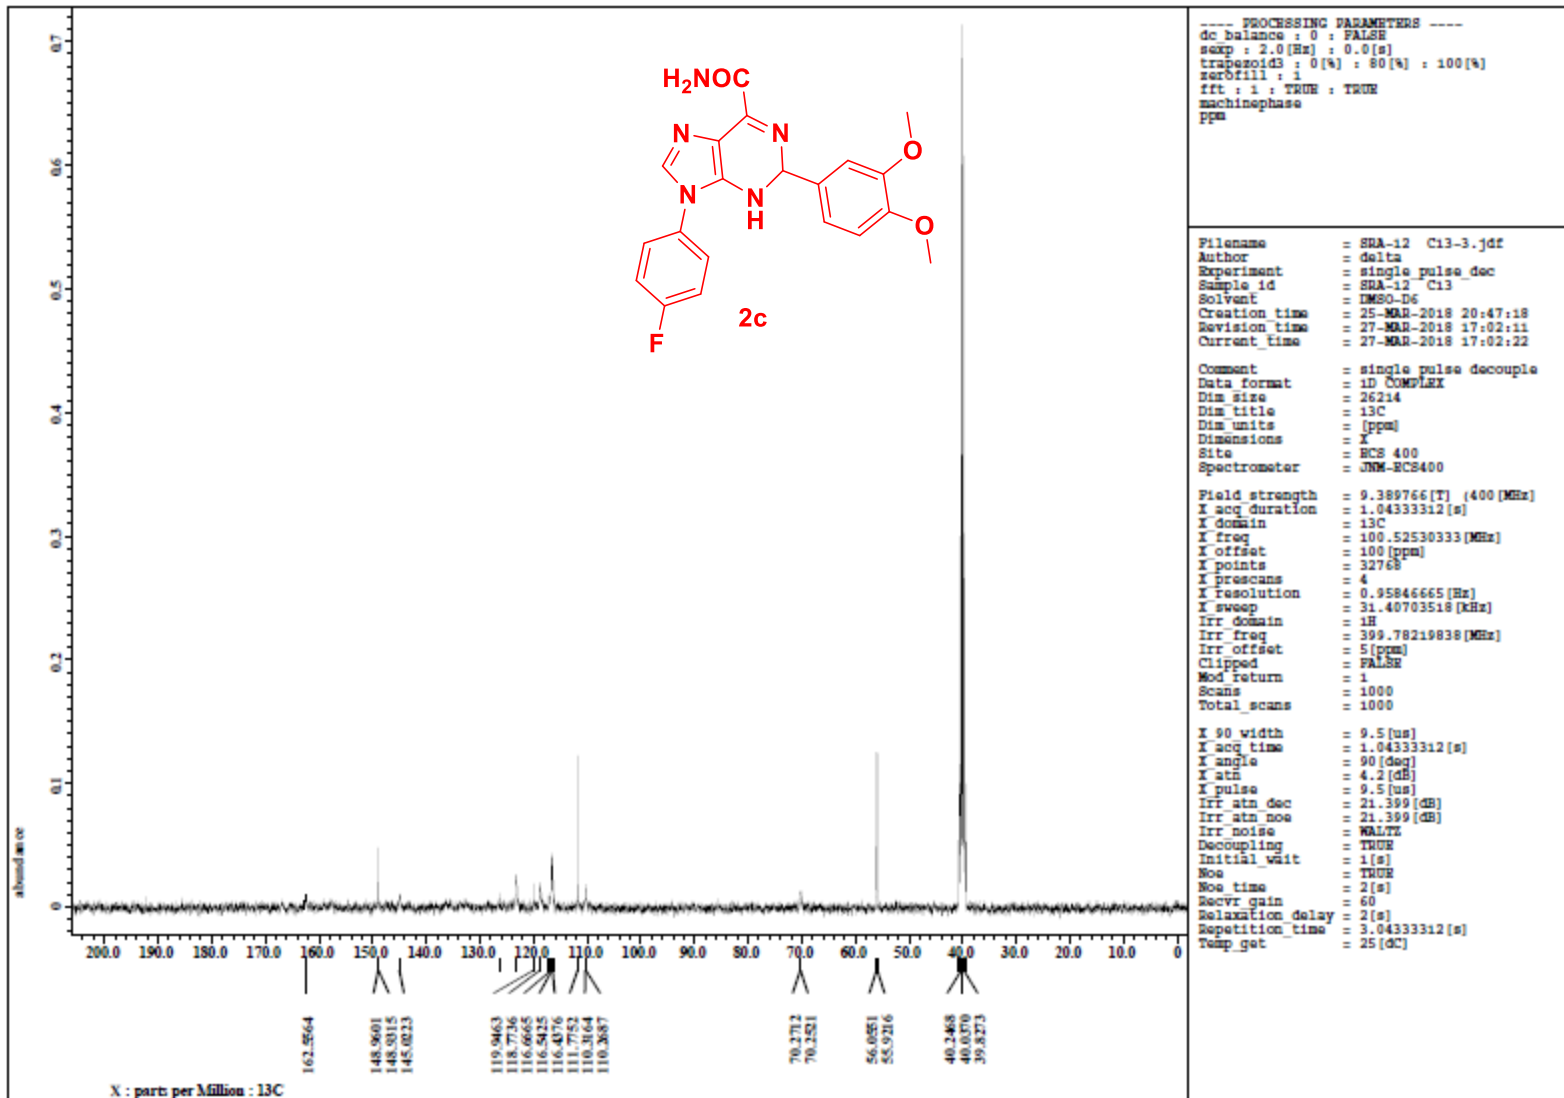

Sample Name : SRA-12  
Test Name : HRMS-1

INDIAN INSTITUTE OF TECHNOLOGY  
ROPAR

XEVO G2-XS QTOF

200218-SRA-12 17 (0.174) AM2 (Ar,13000.0,0.00,0.00); Cm (17:21)

1: TOF MS ES+  
6.38e6

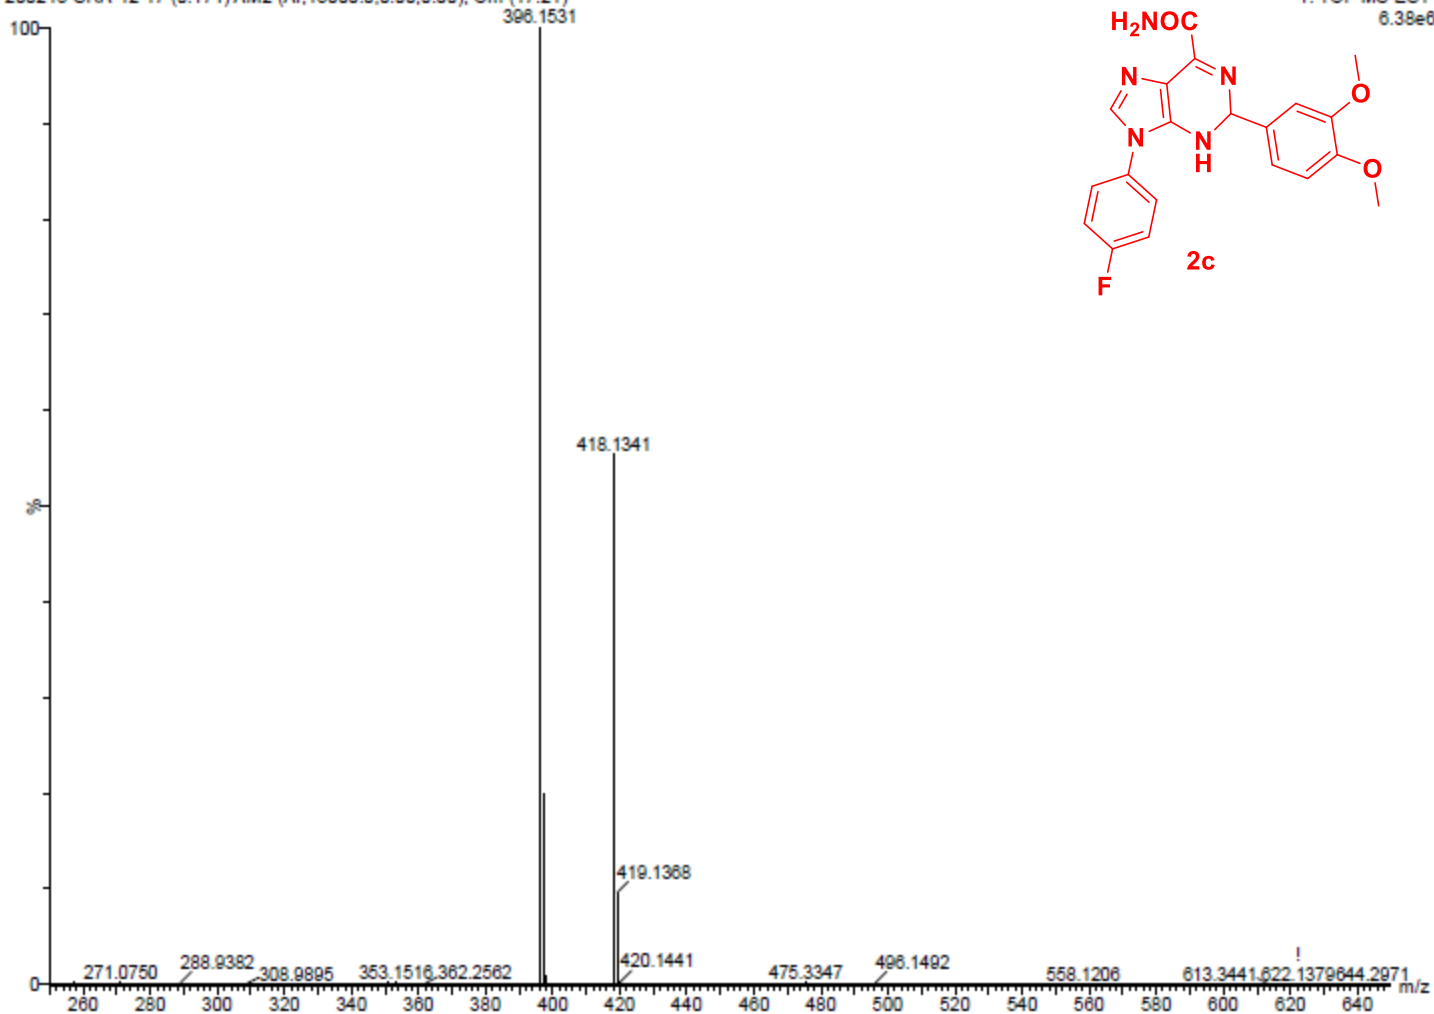

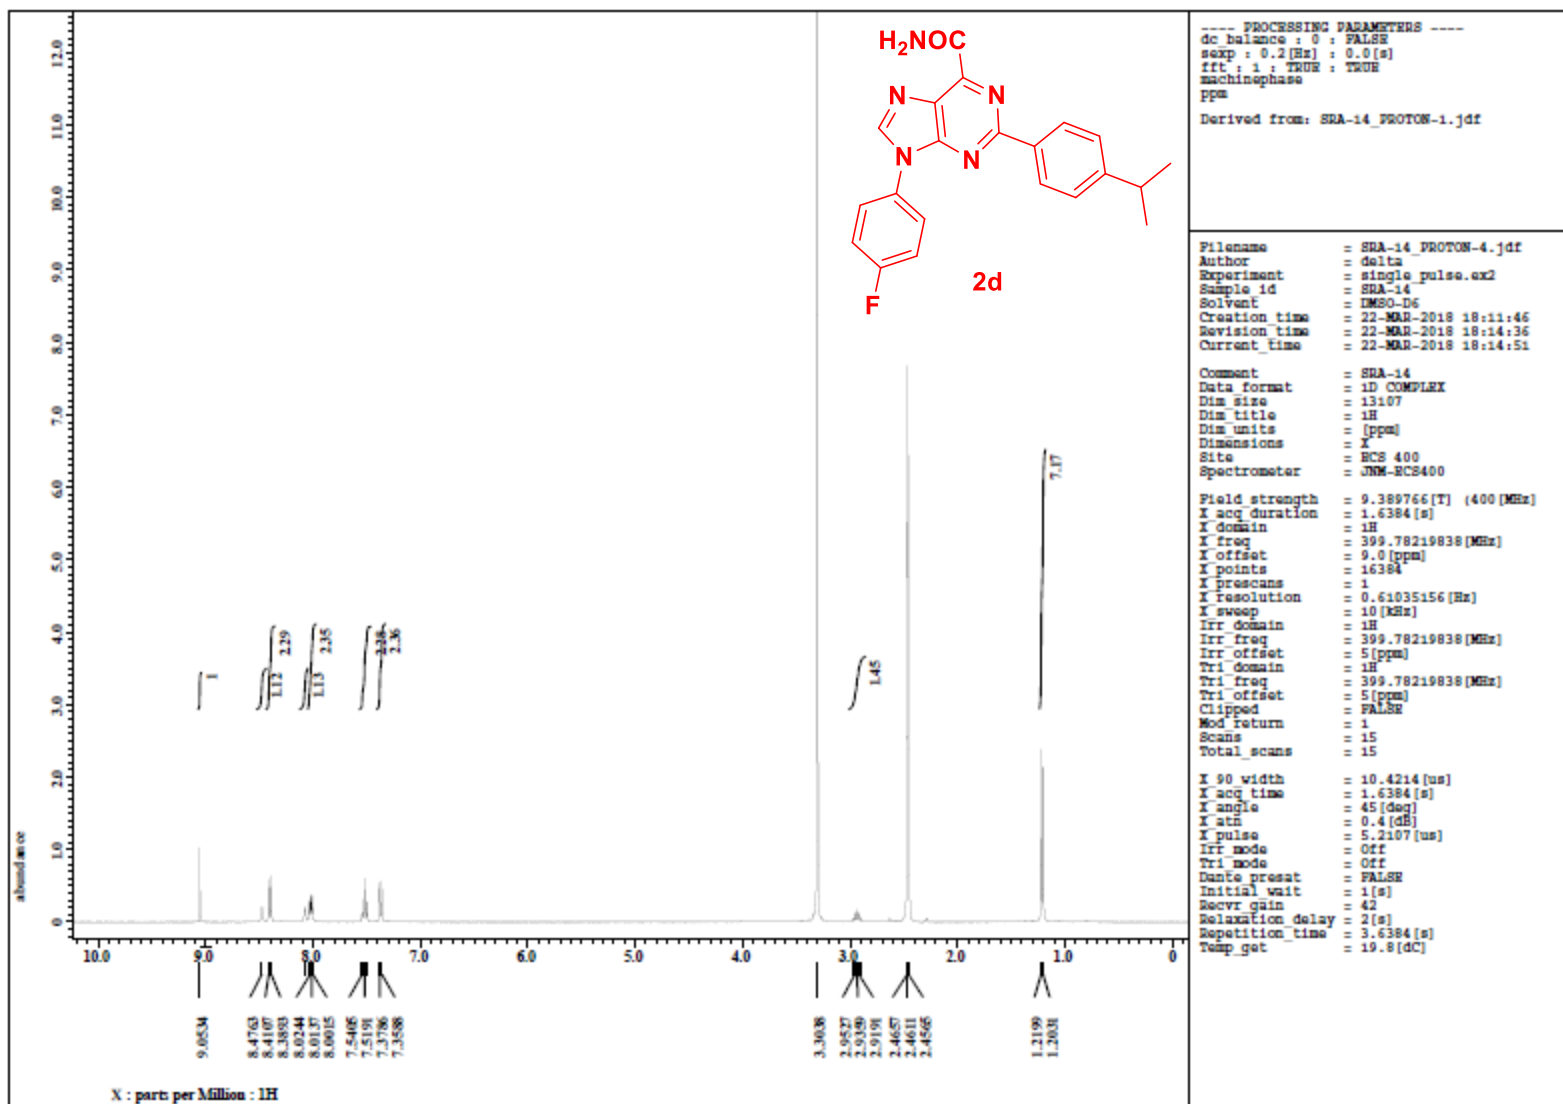

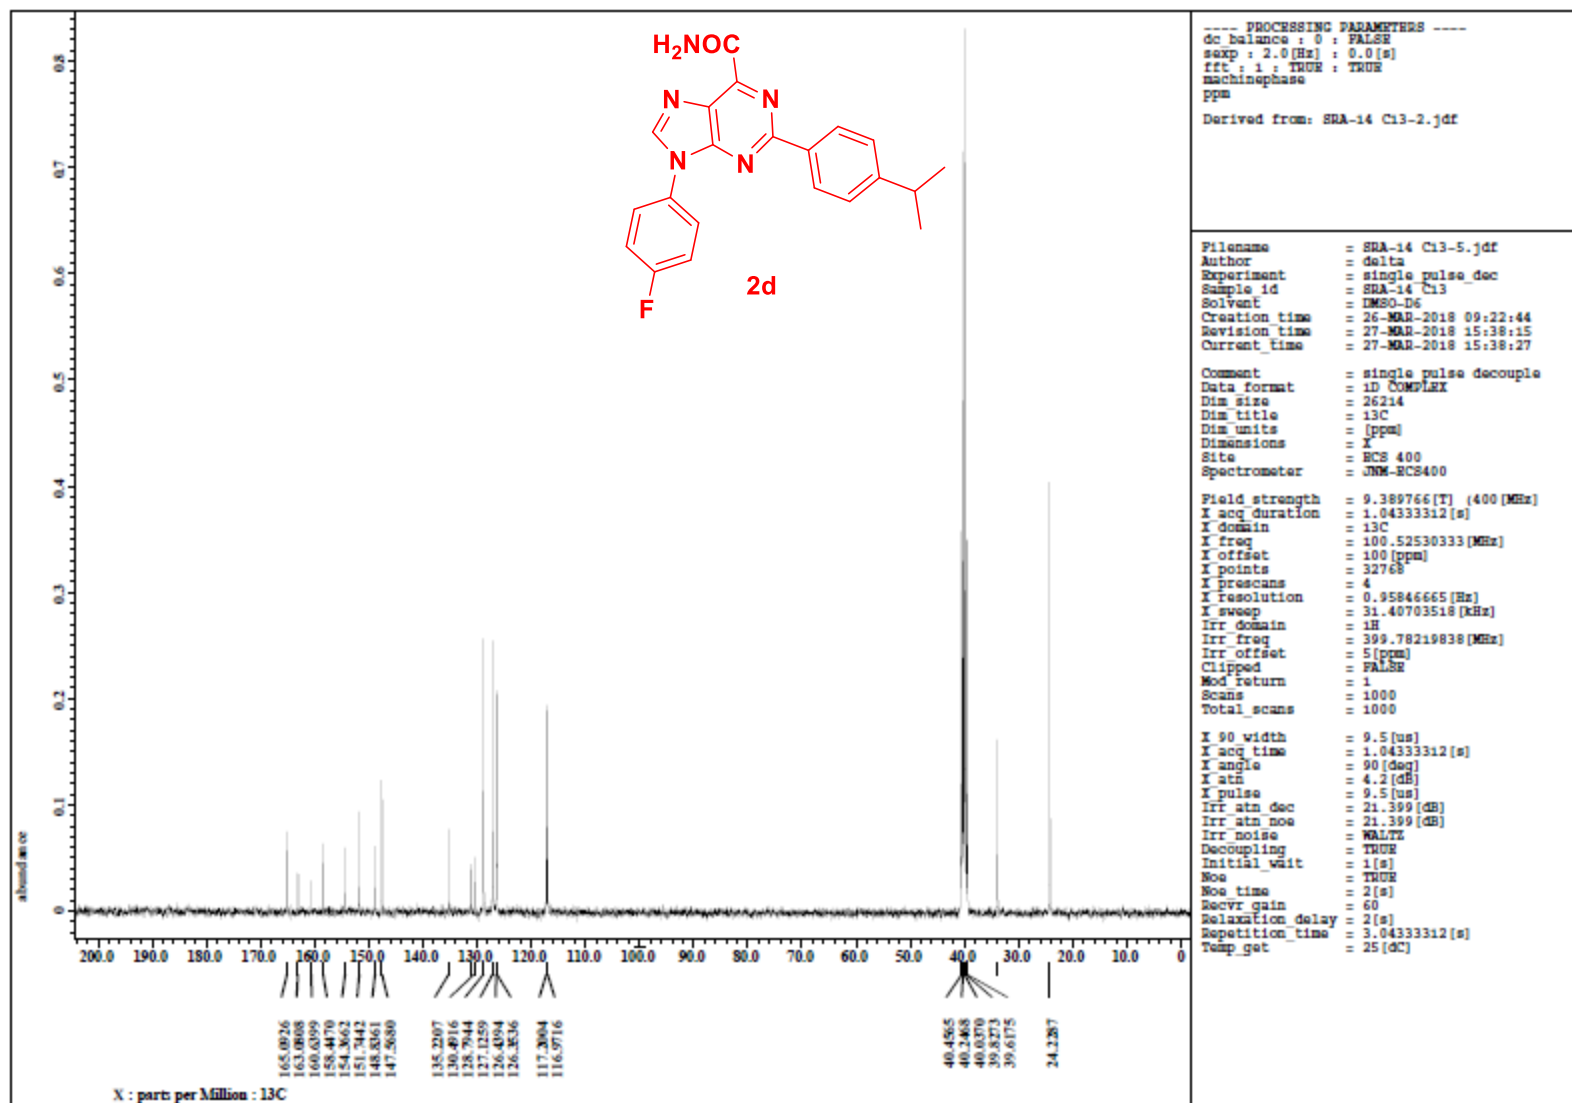

# Elemental Composition Report

Page 1

## Single Mass Analysis

Tolerance = 5.0 PPM / DBE: min = -1.5, max = 50.0

Element prediction: Off

Number of isotope peaks used for i-FIT = 5

Monoisotopic Mass, Even Electron Ions

37 formula(e) evaluated with 1 results within limits (up to 50 best isotopic matches for each mass)

Elements Used:

C: 9-22 H: 6-25 N: 0-5 O: 0-3 F: 0-1

Sample Name : SRA-14

IITRPR

XEVO G2-XS QTOF

Test Name : HRMS-1

160120-SRA-14 16 (0.165)

1: TOF MS ES+

4.43e+007

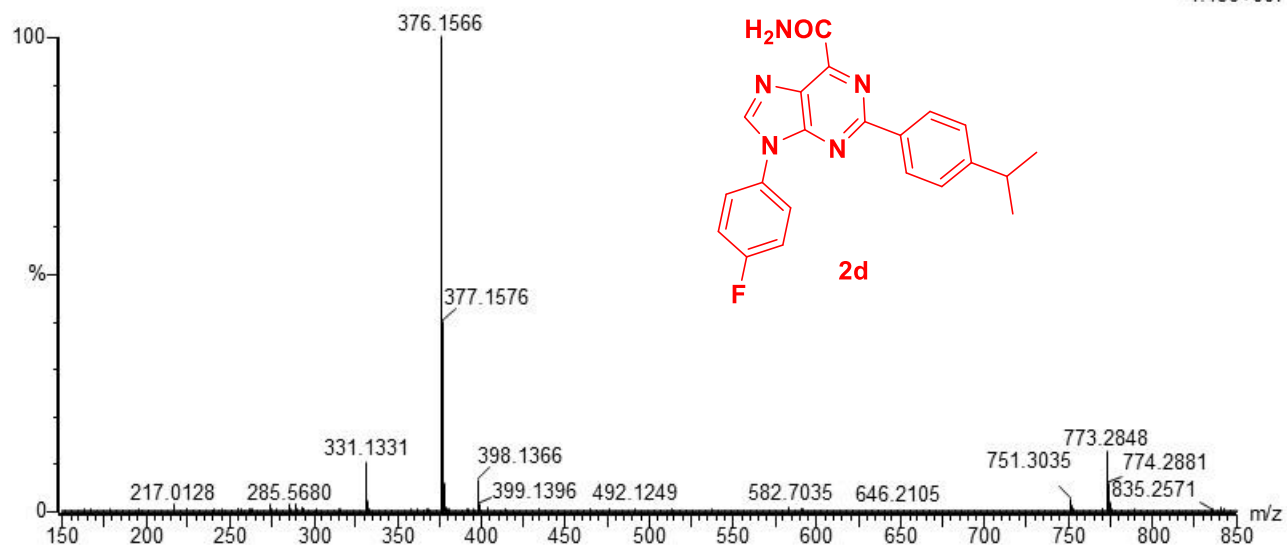

Minimum: -1.5  
Maximum: 5.0 5.0 50.0

| Mass     | Calc. Mass | mDa  | PPM  | DBE  | i-FIT  | Norm | Conf(%) | Formula                                            |
|----------|------------|------|------|------|--------|------|---------|----------------------------------------------------|
| 376.1566 | 376.1574   | -0.8 | -2.1 | 14.5 | 1626.0 | n/a  | n/a     | C <sub>21</sub> H <sub>19</sub> N <sub>5</sub> O F |

Line#2 R.Time:7.485(Scan#:1198)

MassPeaks:487

RawMode:Averaged 7.480-7.490(1197-1199) BasePeak:94(1695199)

BG Mode:Calc. from Peak Group 1 - Event 1

intensity

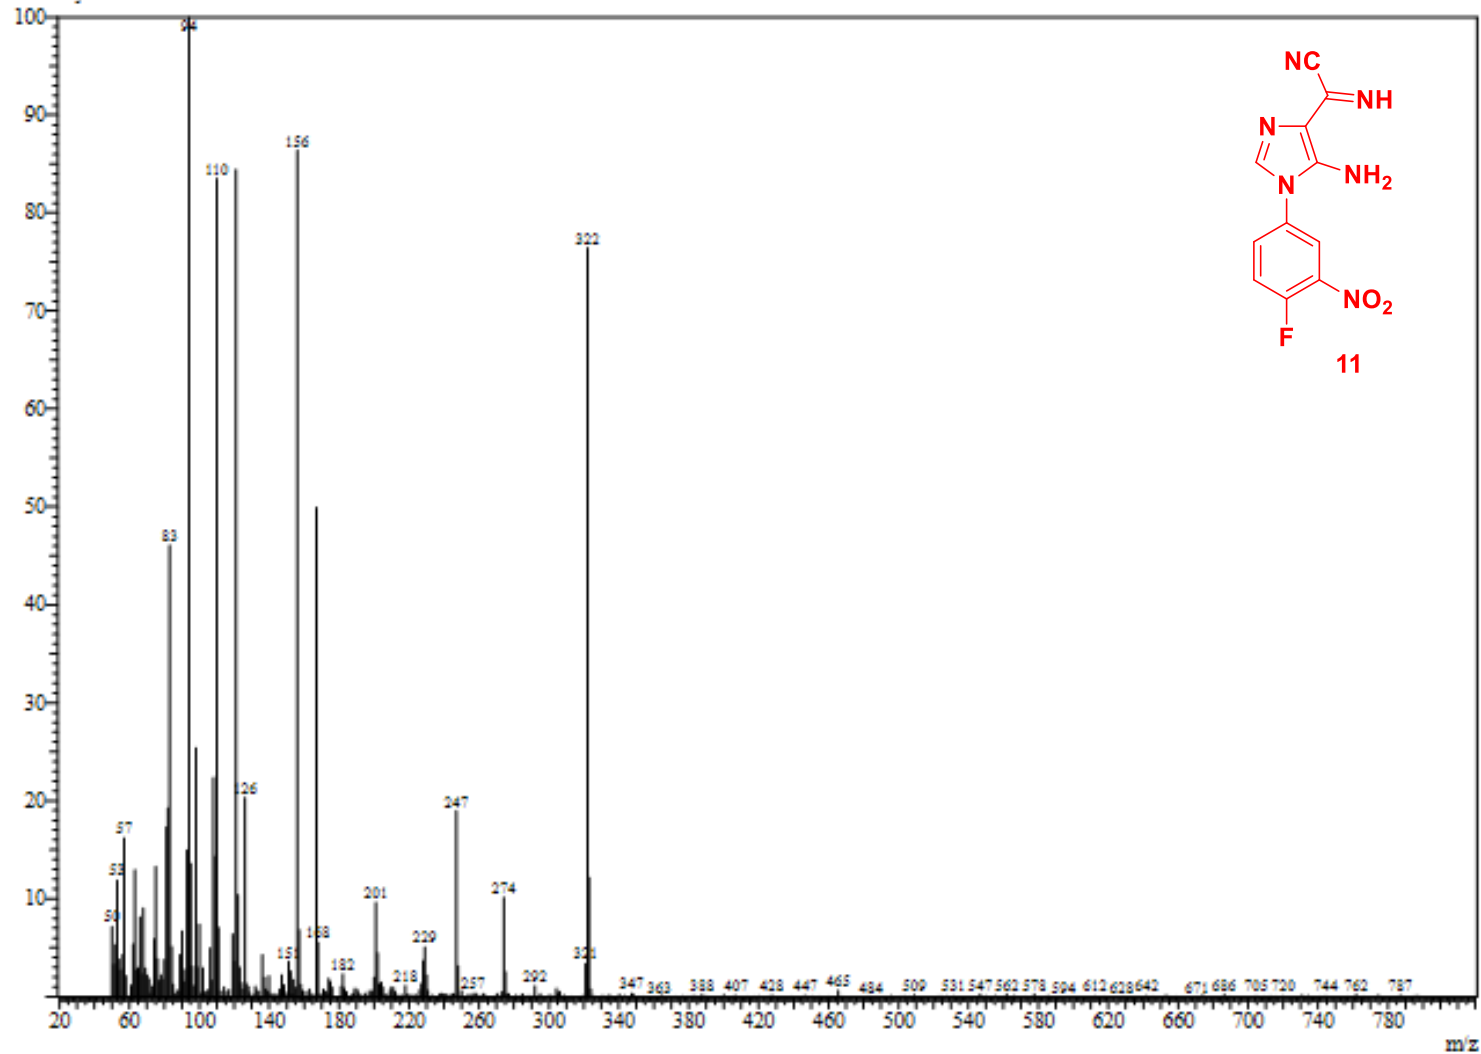

Line#1 R.Time:6.935(Scan#:1088)

MassPeaks:431

RawMode:Averaged 6.930-6.940(1087-1089) BasePeak:156(346019)

BGMode:Calc. from Peak Group 1 - Event 1

intensity

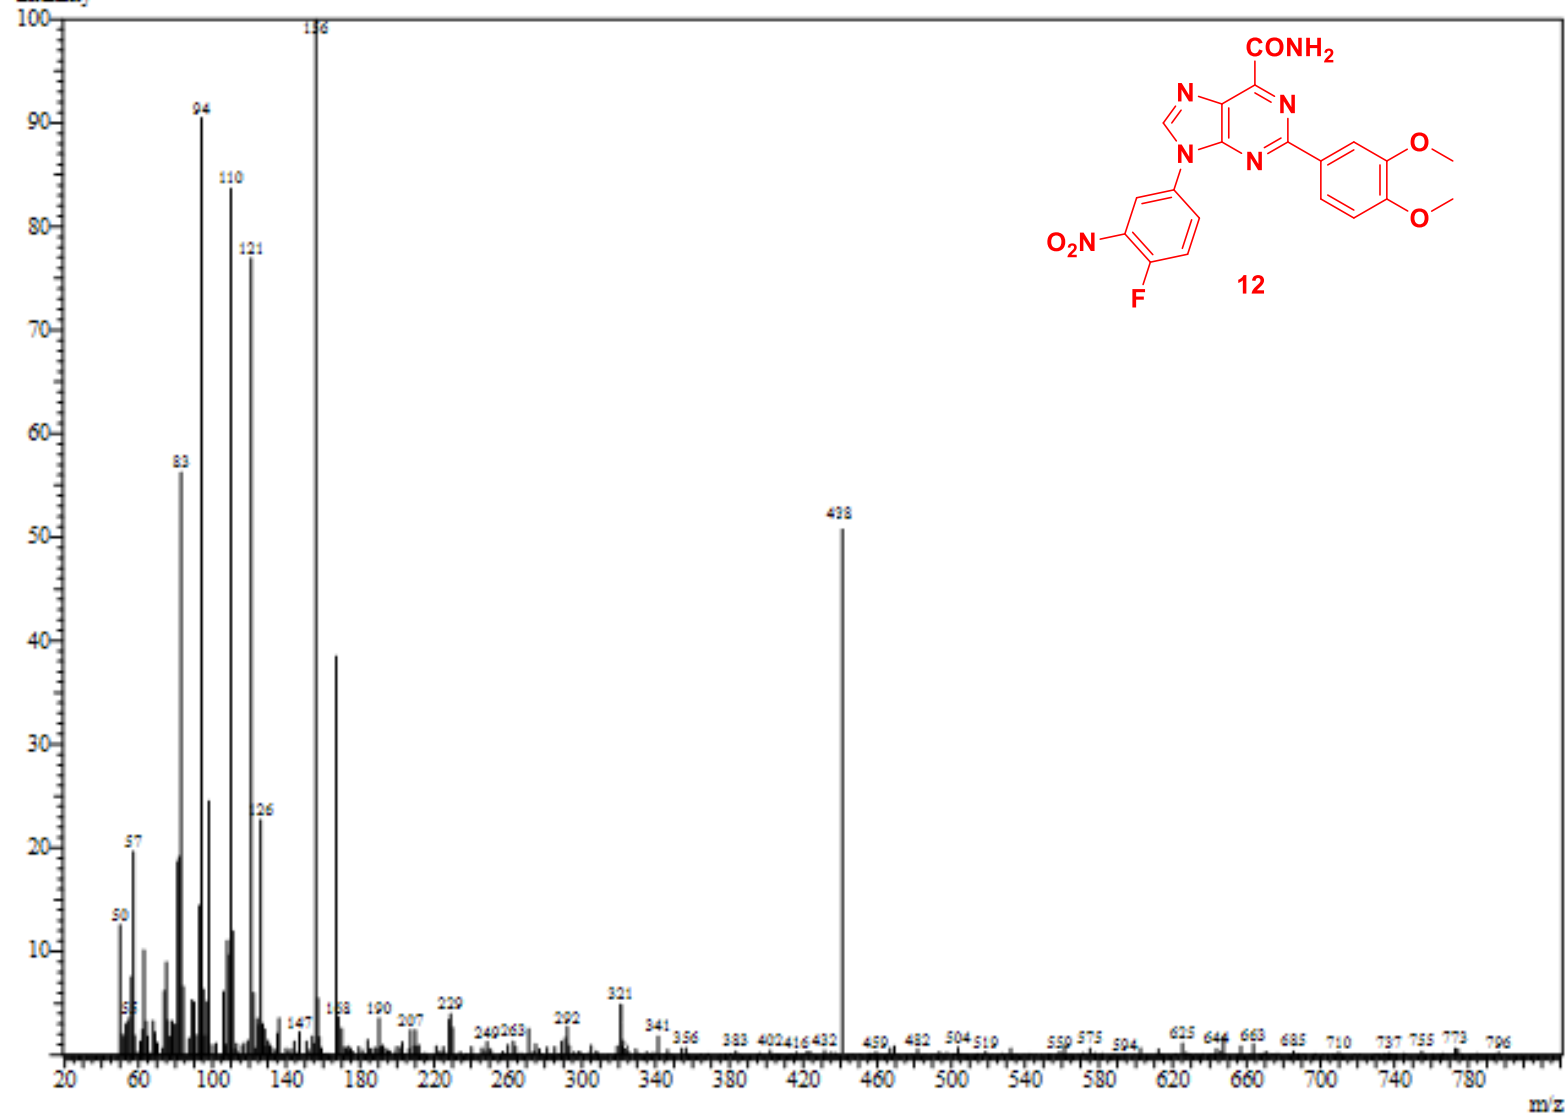

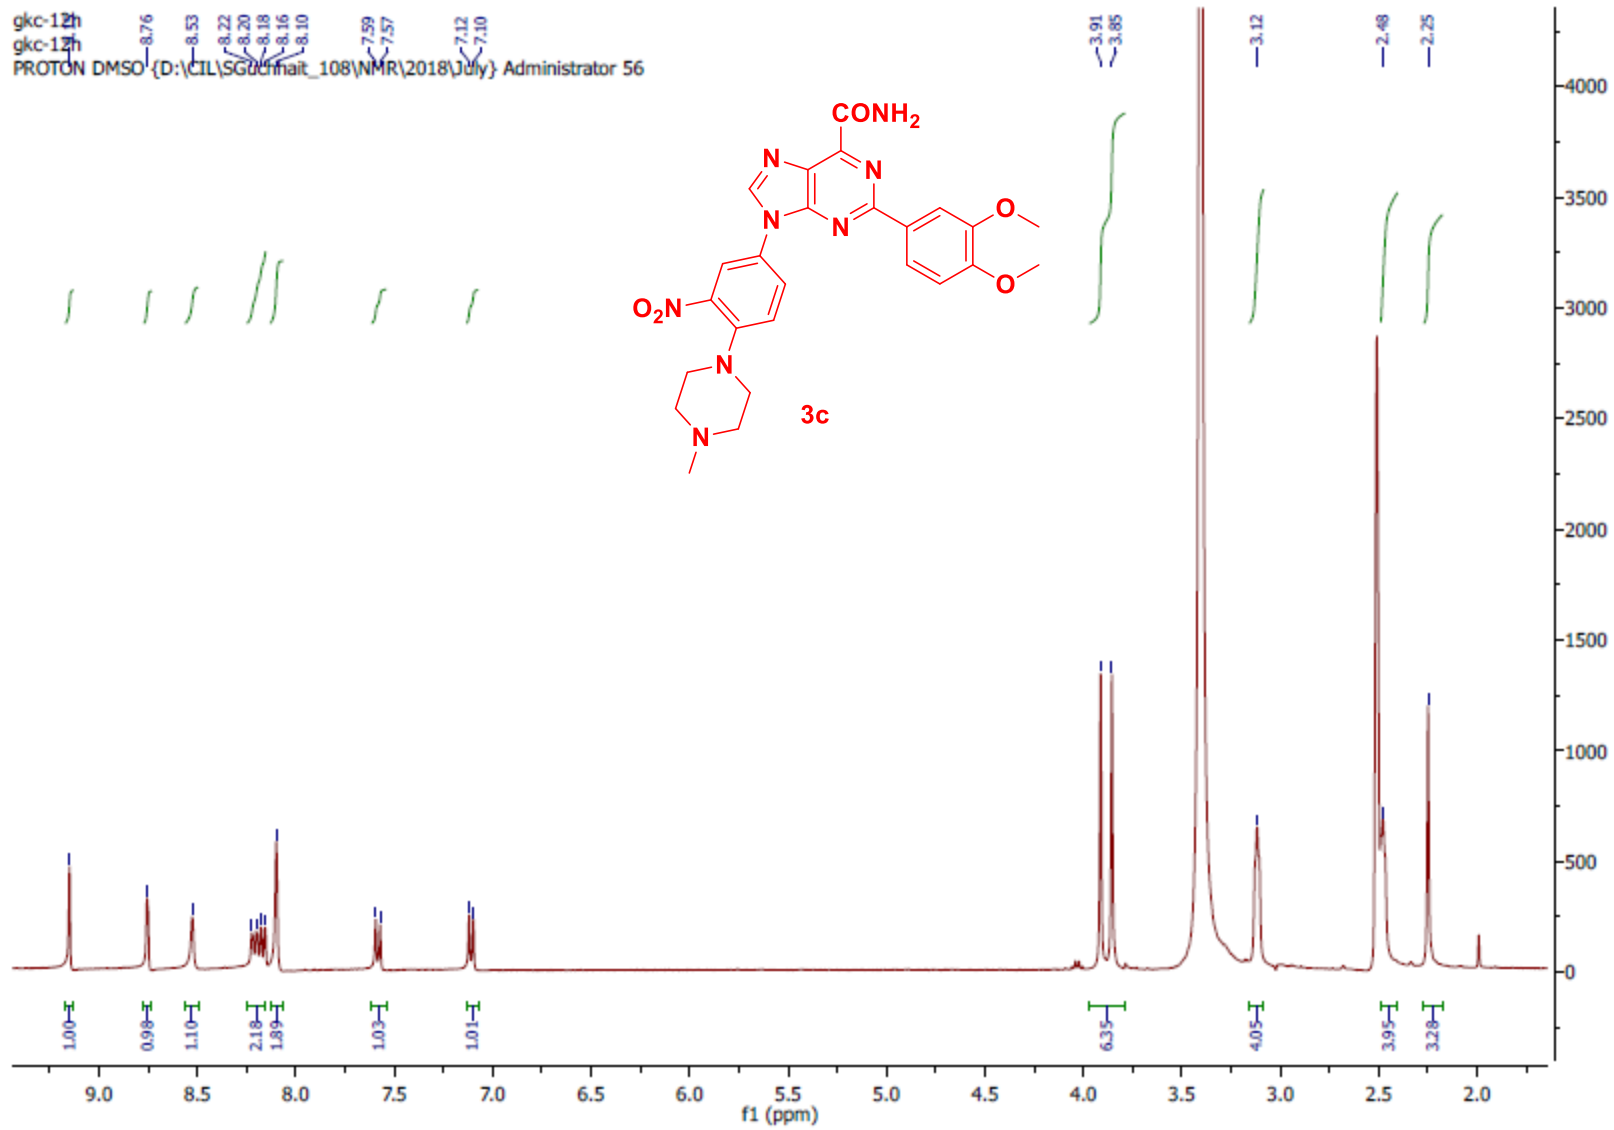

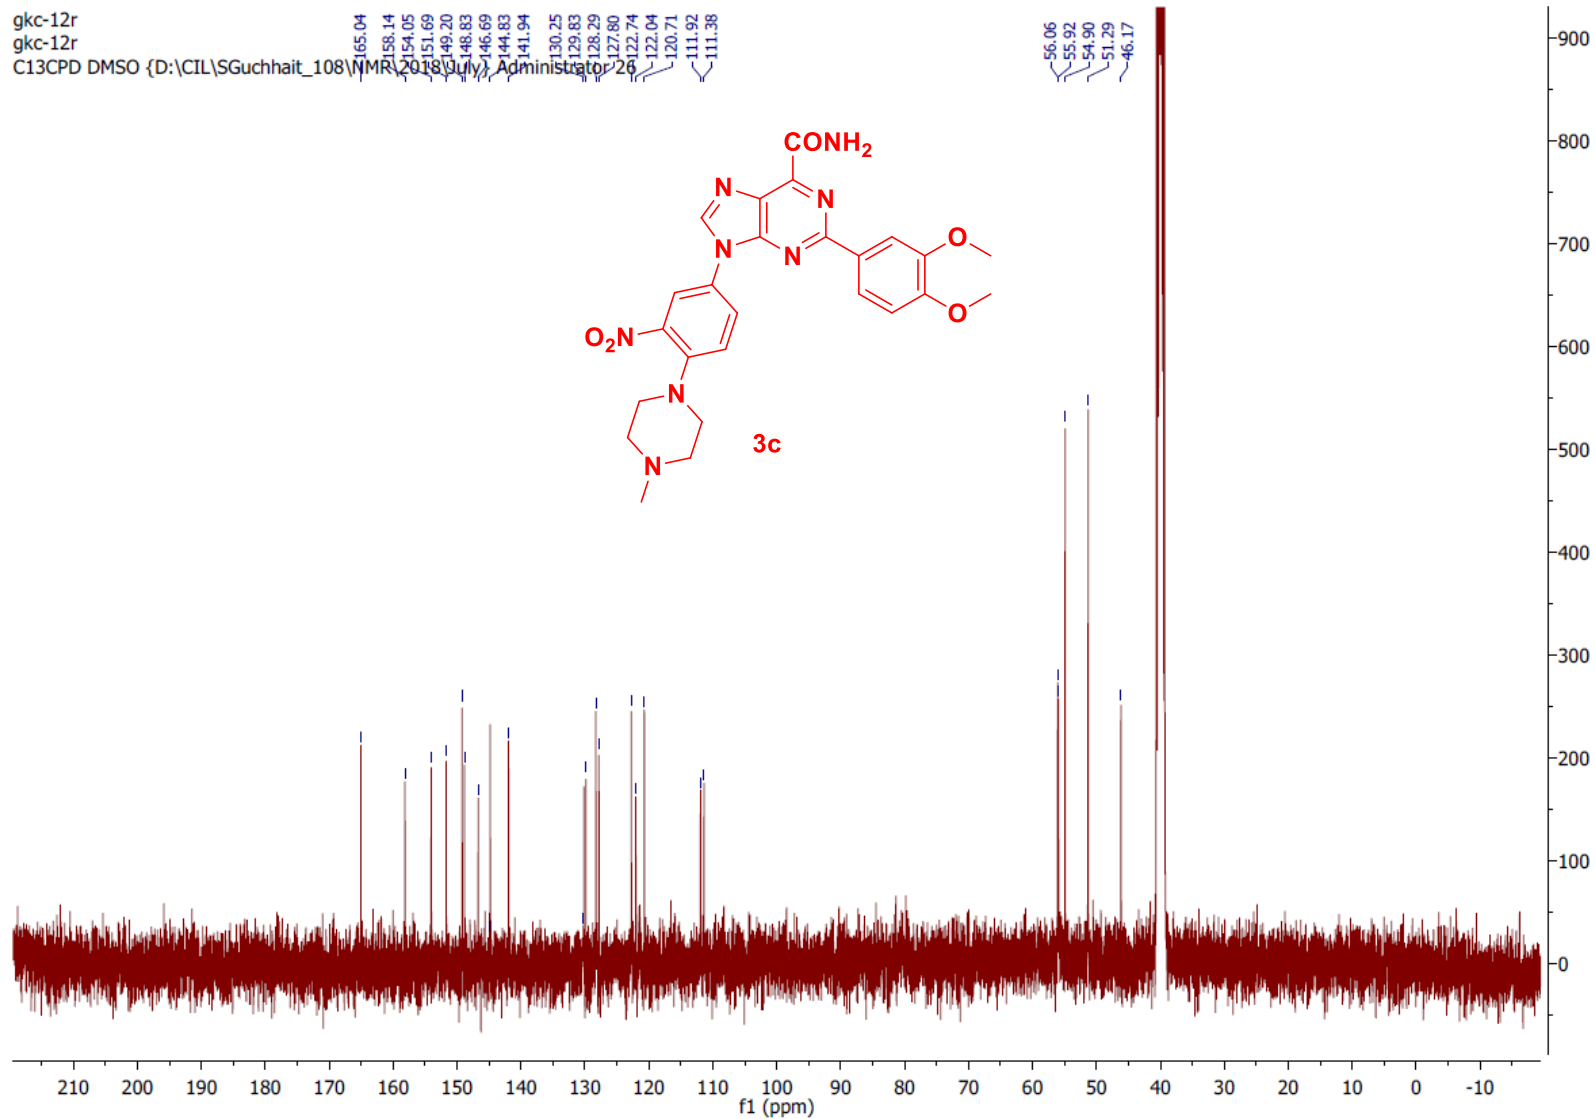

Sample Name : ANP12

Test Name : HRMS-1

020818-ANP12 19 (0.203) AM2 (Ar, 19000.0,0.00,0.00); Cm (19:22)

I.I.T.ROPAR

XEVO G2-XS QTOF

1: TOF MS ES+

7.52e6

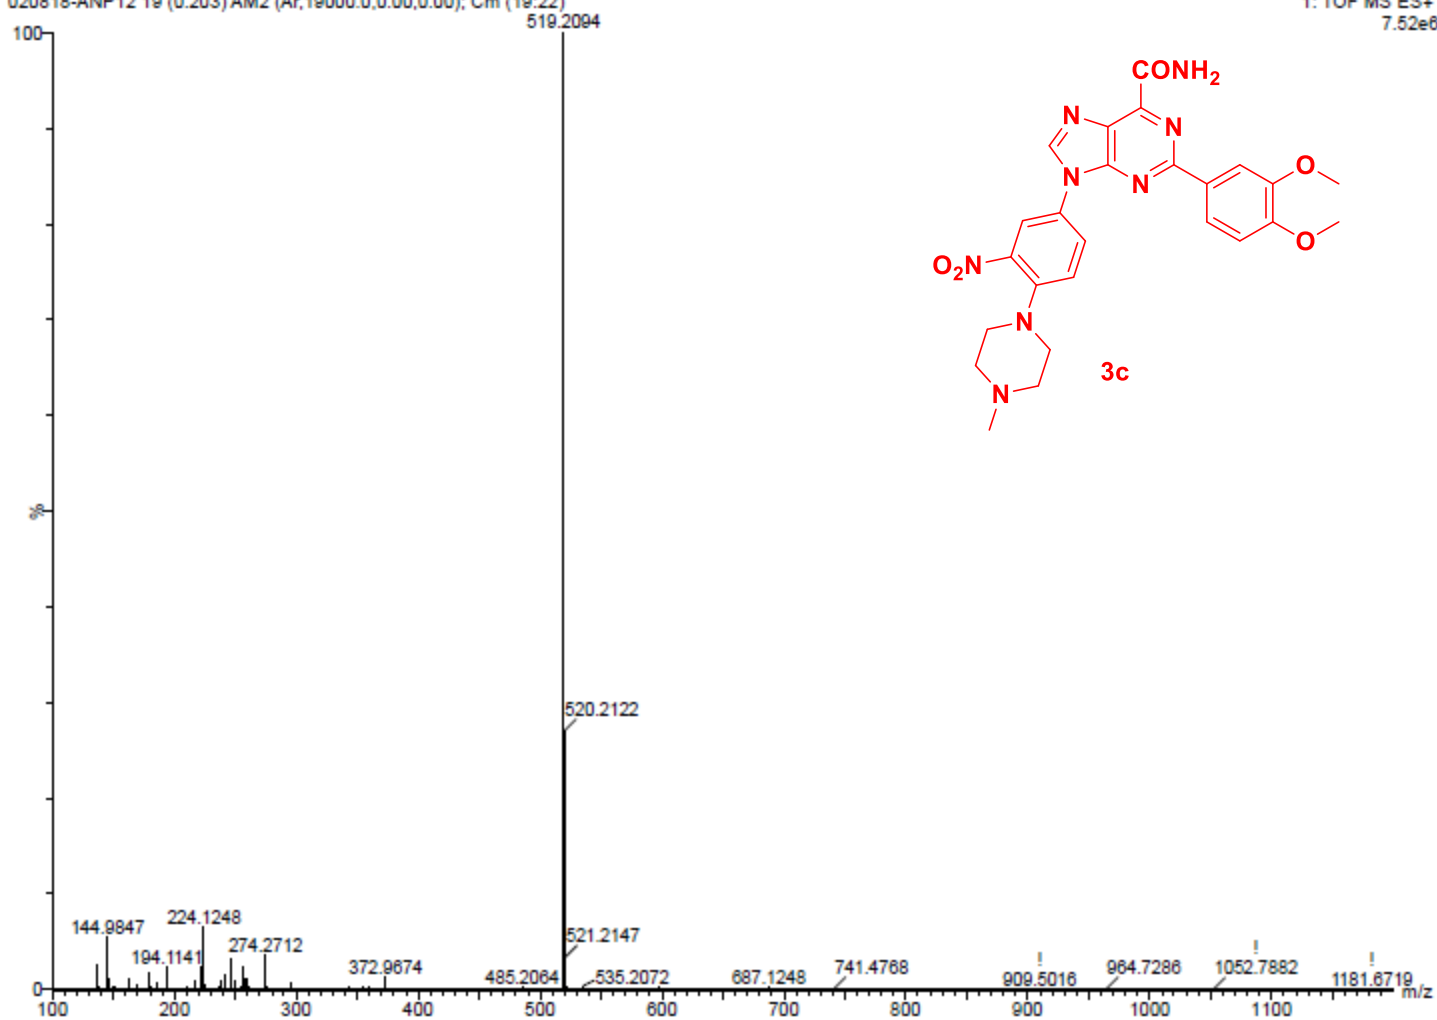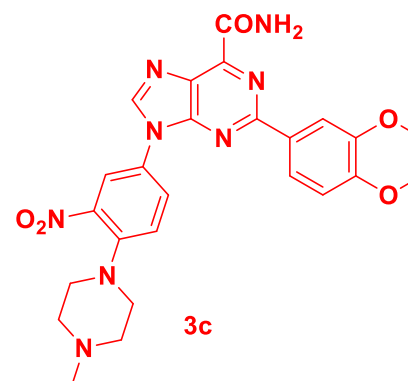

### Molecular docking of 3c in HER-2 and other proteins

We performed molecular docking of most potent compound 3c into the HER-2 kinase and other related proteins such as CDK-2, 4, 6, ER $\alpha$  and PR and results were compared with their positive controls (Table S1). The Figure S1 represents the 3D binding pose of the lapatinib (positive control) and the compound 3c in the active site of the HER-2 (PDB: 3RCD). The lapatinib occupied more surface area of 521.59 Å<sup>2</sup> of binding cavity of HER-2 protein than compound 3c (471.50 Å<sup>2</sup>). This could be due to the presence of an extra fluorenyl ring in lapatinib structure which increases the surface area of lapatinib by 50 Å<sup>2</sup> and supports the crucial  $\pi$ - $\pi$  interaction with PHE891 (Figure S1). Moreover, it was observed that lapatinib binding to active site was favoured by the hydrophobic interaction (LEU796, MET 801 and PHE891) and salt bridge interaction (ASP808) whereas compound 3c showed only one hydrophobic interaction (MET801), one polar interaction (GLN799) and one salt bridge interaction with LYS753 and hence lapatinib showed better dock score (-12.39) than our compound 3c (-6.08).

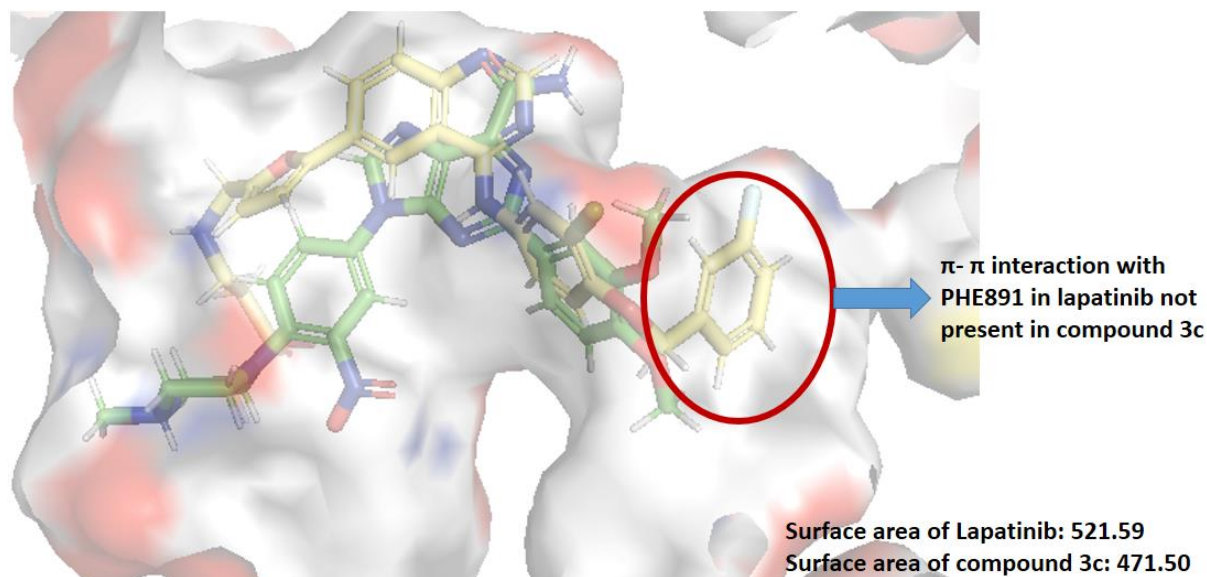

**Figure S1:** Represents the structure of lapatinib (yellow) and compound 3c (green) in HER-2 protein (PDB: 3RCD) with important fluorenyl ring in lapatinib that increases surface area of lapatinib by 50 Å<sup>2</sup> and supports  $\pi$ - $\pi$  interaction with PHE891.

Similarly, docking results of compound **3c** were not favourable with other proteins as well (CDK-2, 4, 6, ER $\alpha$  and PR). We already mentioned in the manuscript that **3c** did not inhibit Cyclin dependant kinases (CDKs) under in vitro condition which could be due to poor binding and docking scores (Table S1). Compound **3c** could not even enter binding cavity of some PR. Therefore, EGDR inhibition could seem to be one of the major anticancer mechanisms.

**Table S1: Docking of compound 3c into other proteins**

| Protein | ID   | Positive Control<br>(Dock Score) | Dock Score<br>(Compound 3c) | 2D interaction with 3c |
|---------|------|----------------------------------|-----------------------------|------------------------|
| CDK2    | 5L2W | Dinaciclib<br>(-13.46)           | -5.47                       |                        |
| CDK4    | 2W9Z | Pablociclib                      | No co-crystallized ligand   | -----                  |

|      |      |                                                  |              |                                                                                     |
|------|------|--------------------------------------------------|--------------|-------------------------------------------------------------------------------------|
|      |      | (NA)                                             |              |                                                                                     |
| CDK6 | 2EUF | <p><b>Pablociclib</b></p> <p><b>(-10.46)</b></p> | <b>-6.82</b> | 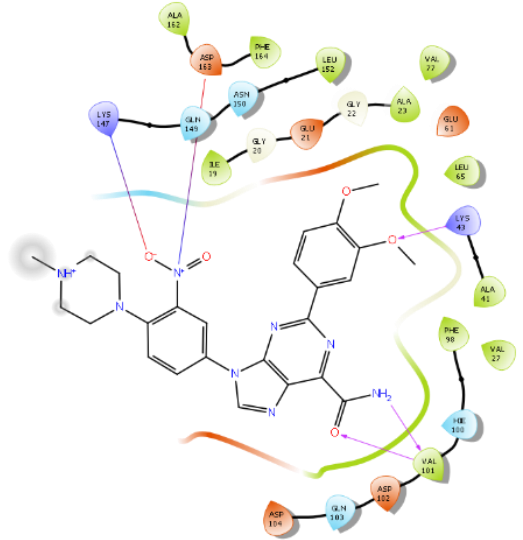 |

|             |             |                                     |              |                                                                                     |
|-------------|-------------|-------------------------------------|--------------|-------------------------------------------------------------------------------------|
| <b>HER2</b> | <b>3RCD</b> | <b>Lapatinib</b><br><b>(-12.39)</b> | <b>-6.03</b> | 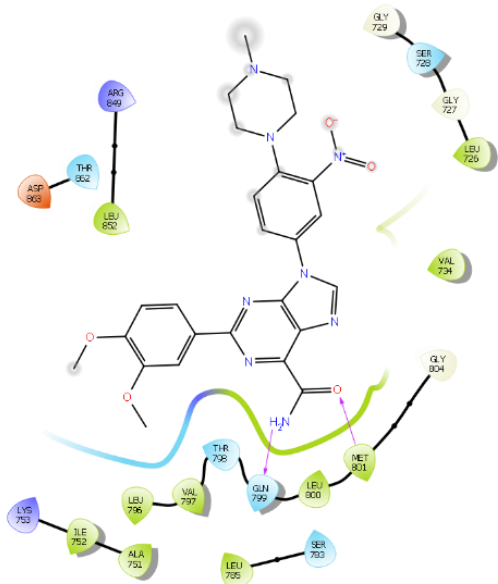 |
|-------------|-------------|-------------------------------------|--------------|-------------------------------------------------------------------------------------|

|             |      |                                   |                       |                                                                                     |
|-------------|------|-----------------------------------|-----------------------|-------------------------------------------------------------------------------------|
| ER $\alpha$ | 5W9C | Tamoxifen<br>(-12.75)             | -2.78                 | 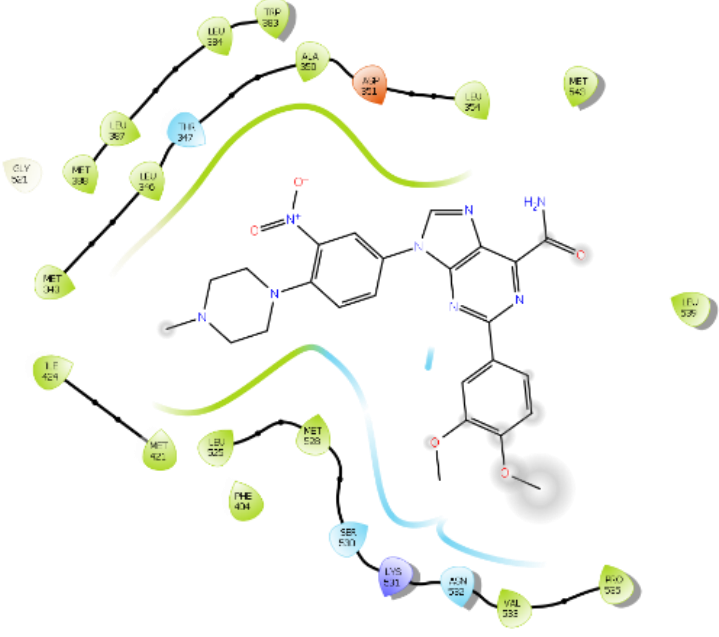 |
| PR          | 2W8Y | <a href="#">Mifepristone</a> (NA) | Not entered in cavity | -----                                                                               |
